# Supplementary material for: Uncovering the Pharmacological Mechanism of Chaibei Zhixian Decoction on Epilepsy by Network Pharmacology Analysis
Source: Evid Based Complement Alternat Med. 2019 May 12;2019:3104741. doi: 10.1155/2019/3104741 (PMC6535852; doi:10.1155/2019/3104741)
Supplement: Supplementary 1 — Supplemental Table 1: 5230 protein targets from the TCMSP database. [file 3104741.f1.xlsx]

## Sheet: Sheet1
Drug	molecule_ID	MOL_ID	molecule_name	target_name	target_ID	drugbank_ID	validated	SVM_score	RF_score
Radix Bupleuri	1109	MOL001109	β-thujene	Gamma-aminobutyric-acid receptor alpha-2 subunit	141	423		0.98359	0.704
Radix Bupleuri	1109	MOL001109	β-thujene	Gamma-aminobutyric acid receptor subunit alpha-1	309	872		0.95828	0.706
Radix Bupleuri	1109	MOL001109	β-thujene	Cytochrome P450-cam	1143	2298		0.93075	0.778
Radix Bupleuri	1109	MOL001109	β-thujene	Progesterone receptor	209	614		0.922503	0.706
Radix Bupleuri	1109	MOL001109	β-thujene	Nuclear receptor coactivator 2	3276	6241		0.802689	0.712
Radix Bupleuri	1121	MOL001121	19894-97-4	Cytochrome P450-cam	1143	2298		0.90756	0.788
Radix Bupleuri	1121	MOL001121	19894-97-4	Gamma-aminobutyric-acid receptor alpha-2 subunit	141	423		0.986076	0.7
Radix Bupleuri	1121	MOL001121	19894-97-4	Gamma-aminobutyric acid receptor subunit alpha-1	309	872		0.965126	0.706
Radix Bupleuri	117	MOL000117	Cymol	Sodium-dependent noradrenaline transporter	186	540		0.81925	0.72
Radix Bupleuri	117	MOL000117	Cymol	Lysozyme	1172	2300		0.825	0.778
Radix Bupleuri	1179	MOL001179	(&#8722;)-Alloaromadendrene	Muscarinic acetylcholine receptor M3	16	51		0.97	0.72
Radix Bupleuri	1179	MOL001179	(&#8722;)-Alloaromadendrene	Muscarinic acetylcholine receptor M1	38	103		0.95811	0.7
Radix Bupleuri	1179	MOL001179	(&#8722;)-Alloaromadendrene	Muscarinic acetylcholine receptor M2	210	617		0.95083	0.728
Radix Bupleuri	1179	MOL001179	(&#8722;)-Alloaromadendrene	Alpha-1B adrenergic receptor	216	632		0.91978	0.704
Radix Bupleuri	1179	MOL001179	(&#8722;)-Alloaromadendrene	Neuronal acetylcholine receptor subunit alpha-2	284	813		0.93611	0.7
Radix Bupleuri	1179	MOL001179	(&#8722;)-Alloaromadendrene	Nuclear receptor coactivator 2	3276	6241		0.843	0.7
Radix Bupleuri	1179	MOL001179	(&#8722;)-Alloaromadendrene	Dopamine D1 receptor	7	23		0.824028	0.702
Radix Bupleuri	1179	MOL001179	(&#8722;)-Alloaromadendrene	Beta-1 adrenergic receptor	63	193		0.829004	0.718
Radix Bupleuri	1179	MOL001179	(&#8722;)-Alloaromadendrene	Retinoic acid receptor RXR-alpha	158	459		0.833726	0.708
Radix Bupleuri	1179	MOL001179	(&#8722;)-Alloaromadendrene	5-hydroxytryptamine 2A receptor	175	502		0.851491	0.71
Radix Bupleuri	1179	MOL001179	(&#8722;)-Alloaromadendrene	Sodium-dependent noradrenaline transporter	186	540		0.830561	0.71
Radix Bupleuri	1179	MOL001179	(&#8722;)-Alloaromadendrene	Alpha-1A adrenergic receptor	191	556		0.8346	0.736
Radix Bupleuri	1179	MOL001179	(&#8722;)-Alloaromadendrene	Gamma-aminobutyric-acid receptor alpha-3 subunit	200	580		0.801967	0.7
Radix Bupleuri	1179	MOL001179	(&#8722;)-Alloaromadendrene	Sodium-dependent dopamine transporter	239	713		0.816399	0.71
Radix Bupleuri	1179	MOL001179	(&#8722;)-Alloaromadendrene	Beta-2 adrenergic receptor	261	766		0.882683	0.734
Radix Bupleuri	1179	MOL001179	(&#8722;)-Alloaromadendrene	Gamma-aminobutyric acid receptor subunit alpha-1	309	872		0.871952	0.754
Radix Bupleuri	1179	MOL001179	(&#8722;)-Alloaromadendrene	Neuronal acetylcholine receptor protein, alpha-7 chain	581	4095		0.80695	0.758
Radix Bupleuri	118	MOL000118	(L)-alpha-Terpineol	Muscarinic acetylcholine receptor M3	16	51		0.91702	0.716
Radix Bupleuri	118	MOL000118	(L)-alpha-Terpineol	Muscarinic acetylcholine receptor M1	38	103		0.93826	0.726
Radix Bupleuri	118	MOL000118	(L)-alpha-Terpineol	Gamma-aminobutyric-acid receptor alpha-2 subunit	141	423		0.96551	0.72
Radix Bupleuri	118	MOL000118	(L)-alpha-Terpineol	Gamma-aminobutyric-acid receptor alpha-5 subunit	181	523		0.95152	0.7
Radix Bupleuri	118	MOL000118	(L)-alpha-Terpineol	Sodium-dependent noradrenaline transporter	186	540		0.90946	0.704
Radix Bupleuri	118	MOL000118	(L)-alpha-Terpineol	Gamma-aminobutyric-acid receptor alpha-3 subunit	200	580		0.9208	0.716
Radix Bupleuri	118	MOL000118	(L)-alpha-Terpineol	Muscarinic acetylcholine receptor M2	210	617		0.95086	0.734
Radix Bupleuri	118	MOL000118	(L)-alpha-Terpineol	Alpha-1B adrenergic receptor	216	632		0.86749	0.706
Radix Bupleuri	118	MOL000118	(L)-alpha-Terpineol	Sodium-dependent dopamine transporter	239	713		0.81137	0.704
Radix Bupleuri	118	MOL000118	(L)-alpha-Terpineol	Gamma-aminobutyric acid receptor subunit alpha-1	309	872		0.91353	0.76
Radix Bupleuri	118	MOL000118	(L)-alpha-Terpineol	Gamma-aminobutyric-acid receptor subunit alpha-6	3284	841		0.92206	0.7
Radix Bupleuri	118	MOL000118	(L)-alpha-Terpineol	Prostaglandin G/H synthase 1	6	20		0.944778	0.718
Radix Bupleuri	118	MOL000118	(L)-alpha-Terpineol	Sodium channel protein type 5 subunit alpha	70	220		0.964973	0.714
Radix Bupleuri	118	MOL000118	(L)-alpha-Terpineol	Coagulation factor Xa	79	239		0.871732	0.706
Radix Bupleuri	118	MOL000118	(L)-alpha-Terpineol	Prostaglandin G/H synthase 2	94	290		0.938267	0.764
Radix Bupleuri	118	MOL000118	(L)-alpha-Terpineol	DNA topoisomerase II	287	817		0.883114	0.726
Radix Bupleuri	118	MOL000118	(L)-alpha-Terpineol	Heat shock protein HSP 90	444	1939		0.967077	0.7
Radix Bupleuri	118	MOL000118	(L)-alpha-Terpineol	Nuclear receptor coactivator 2	3276	6241		0.808453	0.768
Radix Bupleuri	118	MOL000118	(L)-alpha-Terpineol	Calcium-activated potassium channel subunit alpha 1	3727	610		0.938849	0.714
Radix Bupleuri	118	MOL000118	(L)-alpha-Terpineol	Cytochrome P450-cam	1143	2298		0.902258	0.808
Radix Bupleuri	118	MOL000118	(L)-alpha-Terpineol	Alpha-1A adrenergic receptor	191	556		0.802075	0.72
Radix Bupleuri	118	MOL000118	(L)-alpha-Terpineol	Ig gamma-1 chain C region	1201	4785		0.914766	0.718
Radix Bupleuri	120	MOL000120	dec-2-enal	Alcohol dehydrogenase 1B	726	444		0.813	0.716
Radix Bupleuri	120	MOL000120	dec-2-enal	Alcohol dehydrogenase 1C	727	517		0.86404	0.72
Radix Bupleuri	122	MOL000122	1,8-cineole	Nitric-oxide synthase, endothelial	95	291		0.808449	0.712
Radix Bupleuri	122	MOL000122	1,8-cineole	Gamma-aminobutyric-acid receptor alpha-2 subunit	141	423		0.942262	0.714
Radix Bupleuri	122	MOL000122	1,8-cineole	Gamma-aminobutyric acid receptor subunit alpha-1	309	872		0.900876	0.748
Radix Bupleuri	122	MOL000122	1,8-cineole	Cytochrome P450-cam	1143	2298		0.908848	0.772
Radix Bupleuri	122	MOL000122	1,8-cineole	Prostaglandin G/H synthase 2	94	290		0.902996	0.71
Radix Bupleuri	122	MOL000122	1,8-cineole	Gamma-aminobutyric-acid receptor alpha-5 subunit	181	523		0.988745	0.7
Radix Bupleuri	122	MOL000122	1,8-cineole	Alcohol dehydrogenase 1B	726	444		0.843536	0.702
Radix Bupleuri	122	MOL000122	1,8-cineole	Alcohol dehydrogenase 1C	727	517		0.847686	0.74
Radix Bupleuri	122	MOL000122	1,8-cineole	Neuronal acetylcholine receptor subunit alpha-2	284	813		0.93443	0.7
Radix Bupleuri	122	MOL000122	1,8-cineole	Gamma-aminobutyric-acid receptor alpha-3 subunit	200	580		0.980703	0.7
Radix Bupleuri	122	MOL000122	1,8-cineole	Proline dehydrogenase, mitochondrial	4451	h001	validated	null	null
Radix Bupleuri	123	MOL000123	geraniol	Alcohol dehydrogenase 1B	726	444		0.80134	0.7
Radix Bupleuri	123	MOL000123	geraniol	Alcohol dehydrogenase 1C	727	517		0.8334	0.702
Radix Bupleuri	123	MOL000123	geraniol	Progesterone receptor	209	614		0.875784	0.702
Radix Bupleuri	123	MOL000123	geraniol	G1/S-specific cyclin-D1	4214	h001	validated	null	null
Radix Bupleuri	123	MOL000123	geraniol	Mitogen-activated protein kinase 3	421	1714	validated	null	null
Radix Bupleuri	123	MOL000123	geraniol	Cell division protein kinase 4	573	3959	validated	null	null
Radix Bupleuri	123	MOL000123	geraniol	Bcl-2 homologous antagonist/killer	4052	h001	validated	null	null
Radix Bupleuri	123	MOL000123	geraniol	Probable E3 ubiquitin-protein ligase HERC5	4441	h001	validated	null	null
Radix Bupleuri	123	MOL000123	geraniol	Protein kinase C beta type	4470	h001	validated	null	null
Radix Bupleuri	123	MOL000123	geraniol	3-hydroxy-3-methylglutaryl-coenzyme A reductase	1644	3387	validated	null	null
Radix Bupleuri	123	MOL000123	geraniol	Cytochrome P450 2B6	670	6030	validated	null	null
Radix Bupleuri	123	MOL000123	geraniol	Sucrase-isomaltase, intestinal	2984	2129	validated	null	null
Radix Bupleuri	123	MOL000123	geraniol	Lactase-phlorizin hydrolase	719	6847	validated	null	null
Radix Bupleuri	126	MOL000126	(-)-nopinene	Gamma-aminobutyric-acid receptor alpha-2 subunit	141	423		0.97804	0.7
Radix Bupleuri	126	MOL000126	(-)-nopinene	Gamma-aminobutyric acid receptor subunit alpha-1	309	872		0.93932	0.7
Radix Bupleuri	126	MOL000126	(-)-nopinene	Cytochrome P450-cam	1143	2298		0.92736	0.814
Radix Bupleuri	126	MOL000126	(-)-nopinene	Prostaglandin G/H synthase 1	6	20		0.913683	0.702
Radix Bupleuri	126	MOL000126	(-)-nopinene	Muscarinic acetylcholine receptor M3	16	51		0.951598	0.72
Radix Bupleuri	126	MOL000126	(-)-nopinene	Muscarinic acetylcholine receptor M1	38	103		0.939506	0.714
Radix Bupleuri	126	MOL000126	(-)-nopinene	Prostaglandin G/H synthase 2	94	290		0.948739	0.734
Radix Bupleuri	126	MOL000126	(-)-nopinene	Retinoic acid receptor RXR-alpha	158	459		0.923732	0.714
Radix Bupleuri	126	MOL000126	(-)-nopinene	Sodium-dependent noradrenaline transporter	186	540		0.94071	0.7
Radix Bupleuri	126	MOL000126	(-)-nopinene	Gamma-aminobutyric-acid receptor alpha-3 subunit	200	580		0.96585	0.724
Radix Bupleuri	126	MOL000126	(-)-nopinene	Muscarinic acetylcholine receptor M2	210	617		0.938205	0.72
Radix Bupleuri	126	MOL000126	(-)-nopinene	Alpha-1B adrenergic receptor	216	632		0.89441	0.71
Radix Bupleuri	126	MOL000126	(-)-nopinene	Nuclear receptor coactivator 2	3276	6241		0.859167	0.72
Radix Bupleuri	126	MOL000126	(-)-nopinene	Gamma-aminobutyric-acid receptor subunit alpha-6	3284	841		0.95746	0.724
Radix Bupleuri	126	MOL000126	(-)-nopinene	Alpha-2C adrenergic receptor	126	378		0.816124	0.702
Radix Bupleuri	126	MOL000126	(-)-nopinene	Alpha-1A adrenergic receptor	191	556		0.873835	0.716
Radix Bupleuri	126	MOL000126	(-)-nopinene	Sodium-dependent dopamine transporter	239	713		0.889508	0.71
Radix Bupleuri	126	MOL000126	(-)-nopinene	Amine oxidase [flavin-containing] A	566	3941		0.842178	0.712
Radix Bupleuri	126	MOL000126	(-)-nopinene	Lysozyme	1172	2300		0.8239	0.756
Radix Bupleuri	126	MOL000126	(-)-nopinene	Gamma-aminobutyric-acid receptor alpha-5 subunit	181	523		0.930333	0.702
Radix Bupleuri	126	MOL000126	(-)-nopinene	Neuronal acetylcholine receptor subunit alpha-2	284	813		0.87381	0.702
Radix Bupleuri	1273	MOL001273	80-57-9	Muscarinic acetylcholine receptor M3	16	51		0.81013	0.702
Radix Bupleuri	1273	MOL001273	80-57-9	Gamma-aminobutyric-acid receptor alpha-2 subunit	141	423		0.88959	0.742
Radix Bupleuri	1273	MOL001273	80-57-9	Cytochrome P450-cam	1143	2298		0.90876	0.79
Radix Bupleuri	1273	MOL001273	80-57-9	Muscarinic acetylcholine receptor M2	210	617		0.800134	0.71
Radix Bupleuri	128	MOL000128	NERYLACETATE	Cytochrome P450-cam	1143	2298		0.894189	0.798
Radix Bupleuri	1283	MOL001283	C09704	Prostaglandin G/H synthase 2	94	290		0.81475	0.734
Radix Bupleuri	1283	MOL001283	C09704	Nuclear receptor coactivator 2	3276	6241		0.813873	0.714
Radix Bupleuri	131	MOL000131	EIC	Prostaglandin G/H synthase 1	6	20		0.87754	0.764
Radix Bupleuri	131	MOL000131	EIC	Prostaglandin G/H synthase 2	94	290		0.86383	0.772
Radix Bupleuri	131	MOL000131	EIC	Retinoic acid receptor RXR-alpha	158	459		0.93284	0.704
Radix Bupleuri	131	MOL000131	EIC	Nuclear receptor coactivator 2	3276	6241		0.81784	0.718
Radix Bupleuri	131	MOL000131	EIC	Lysozyme	1172	2300		0.866807	0.702
Radix Bupleuri	131	MOL000131	EIC	Nicotinate-nucleotide--dimethylbenzimidazole phosphoribosyltransferase	2262	2264		0.944472	0.71
Radix Bupleuri	131	MOL000131	EIC	Sodium-dependent noradrenaline transporter	186	540		0.8473	0.704
Radix Bupleuri	131	MOL000131	EIC	Ig gamma-1 chain C region	1201	4785		0.96227	0.704
Radix Bupleuri	131	MOL000131	EIC	Gamma-aminobutyric-acid receptor alpha-2 subunit	141	423		0.977307	0.706
Radix Bupleuri	131	MOL000131	EIC	Gamma-aminobutyric acid receptor subunit alpha-1	309	872		0.938922	0.704
Radix Bupleuri	131	MOL000131	EIC	Cytochrome P450-cam	1143	2298		0.928744	0.826
Radix Bupleuri	131	MOL000131	EIC	Transient receptor potential cation channel subfamily V member 1	404	1558		0.91069	0.7
Radix Bupleuri	131	MOL000131	EIC	Muscarinic acetylcholine receptor M1	38	103		0.828769	0.714
Radix Bupleuri	131	MOL000131	EIC	Muscarinic acetylcholine receptor M2	210	617		0.876573	0.73
Radix Bupleuri	131	MOL000131	EIC	Gamma-aminobutyric-acid receptor subunit alpha-6	3284	841		0.826446	0.702
Radix Bupleuri	1386	MOL001386	Methyl laurate	Ig gamma-1 chain C region	1201	4785		0.97266	0.702
Radix Bupleuri	1386	MOL001386	Methyl laurate	Nuclear receptor coactivator 2	3276	6241		0.8952	0.718
Radix Bupleuri	1393	MOL001393	myristic acid	Prostaglandin G/H synthase 1	6	20		0.876438	0.738
Radix Bupleuri	1393	MOL001393	myristic acid	Prostaglandin G/H synthase 2	94	290		0.841877	0.764
Radix Bupleuri	1393	MOL001393	myristic acid	Cholinesterase	559	3923		0.916548	0.702
Radix Bupleuri	1393	MOL001393	myristic acid	Phospholipase A2	708	6500		0.91231	0.728
Radix Bupleuri	1393	MOL001393	myristic acid	Rhinovirus coat protein	709	6521		0.908699	0.716
Radix Bupleuri	1393	MOL001393	myristic acid	Ig gamma-1 chain C region	1201	4785		0.980295	0.728
Radix Bupleuri	1393	MOL001393	myristic acid	Ferrichrome-iron receptor	1306	2427		0.958142	0.74
Radix Bupleuri	1393	MOL001393	myristic acid	3-oxoacyl-[acyl-carrier-protein] synthase 1	1491	889		0.95545	0.708
Radix Bupleuri	1393	MOL001393	myristic acid	Nuclear receptor coactivator 2	3276	6241		0.938735	0.724
Radix Bupleuri	1393	MOL001393	myristic acid	Nuclear receptor coactivator 1	3279	6228		0.885913	0.716
Radix Bupleuri	1393	MOL001393	myristic acid	Phosphatidylcholine-sterol acyltransferase	4426	h001	validated	null	null
Radix Bupleuri	1396	MOL001396	PENTADECYLIC ACID	Prostaglandin G/H synthase 1	6	20		0.828121	0.726
Radix Bupleuri	1396	MOL001396	PENTADECYLIC ACID	Rhodopsin	477	2207		0.951031	0.706
Radix Bupleuri	1396	MOL001396	PENTADECYLIC ACID	Ig gamma-1 chain C region	1201	4785		0.97617	0.716
Radix Bupleuri	1396	MOL001396	PENTADECYLIC ACID	Ferrichrome-iron receptor	1306	2427		0.927518	0.712
Radix Bupleuri	1396	MOL001396	PENTADECYLIC ACID	Nuclear receptor coactivator 2	3276	6241		0.916645	0.722
Radix Bupleuri	1396	MOL001396	PENTADECYLIC ACID	Prostaglandin G/H synthase 2	94	290		0.812487	0.754
Radix Bupleuri	1417	MOL001417	OCTENAL	Alcohol dehydrogenase 1B	726	444		0.84222	0.736
Radix Bupleuri	1417	MOL001417	OCTENAL	Alcohol dehydrogenase 1C	727	517		0.87447	0.732
Radix Bupleuri	1417	MOL001417	OCTENAL	Trypsin-3	3952	2886		0.82145	0.71
Radix Bupleuri	1600	MOL001600	copaene	Prostaglandin G/H synthase 2	94	290		0.90734	0.72
Radix Bupleuri	1600	MOL001600	copaene	Gamma-aminobutyric acid receptor subunit alpha-1	309	872		0.95353	0.72
Radix Bupleuri	1600	MOL001600	copaene	Muscarinic acetylcholine receptor M3	16	51		0.958169	0.728
Radix Bupleuri	1600	MOL001600	copaene	Muscarinic acetylcholine receptor M1	38	103		0.943449	0.716
Radix Bupleuri	1600	MOL001600	copaene	Gamma-aminobutyric-acid receptor alpha-2 subunit	141	423		0.942101	0.704
Radix Bupleuri	1600	MOL001600	copaene	Retinoic acid receptor RXR-alpha	158	459		0.893033	0.706
Radix Bupleuri	1600	MOL001600	copaene	Muscarinic acetylcholine receptor M2	210	617		0.939549	0.726
Radix Bupleuri	1600	MOL001600	copaene	Alpha-1B adrenergic receptor	216	632		0.88554	0.706
Radix Bupleuri	1600	MOL001600	copaene	Cytochrome P450-cam	1143	2298		0.856067	0.7
Radix Bupleuri	1600	MOL001600	copaene	Gamma-aminobutyric-acid receptor subunit alpha-6	3284	841		0.924312	0.7
Radix Bupleuri	1645	MOL001645	Linoleyl acetate	Prostaglandin G/H synthase 1	6	20		0.867601	0.746
Radix Bupleuri	1645	MOL001645	Linoleyl acetate	Prostaglandin G/H synthase 2	94	290		0.855175	0.752
Radix Bupleuri	1645	MOL001645	Linoleyl acetate	Nuclear receptor coactivator 2	3276	6241		0.844292	0.718
Radix Bupleuri	1645	MOL001645	Linoleyl acetate	Retinoic acid receptor RXR-alpha	158	459		0.94114	0.708
Radix Bupleuri	169	MOL000169	alpha-Guaiene	Prostaglandin G/H synthase 1	6	20		0.915842	0.714
Radix Bupleuri	169	MOL000169	alpha-Guaiene	Muscarinic acetylcholine receptor M1	38	103		0.946359	0.702
Radix Bupleuri	169	MOL000169	alpha-Guaiene	Prostaglandin G/H synthase 2	94	290		0.937629	0.75
Radix Bupleuri	169	MOL000169	alpha-Guaiene	Gamma-aminobutyric-acid receptor alpha-2 subunit	141	423		0.970687	0.702
Radix Bupleuri	169	MOL000169	alpha-Guaiene	Retinoic acid receptor RXR-alpha	158	459		0.885509	0.706
Radix Bupleuri	169	MOL000169	alpha-Guaiene	Sodium-dependent noradrenaline transporter	186	540		0.934307	0.71
Radix Bupleuri	169	MOL000169	alpha-Guaiene	Gamma-aminobutyric acid receptor subunit alpha-1	309	872		0.974378	0.72
Radix Bupleuri	169	MOL000169	alpha-Guaiene	Amine oxidase [flavin-containing] B	565	3939		0.81446	0.71
Radix Bupleuri	169	MOL000169	alpha-Guaiene	Nuclear receptor coactivator 2	3276	6241		0.859479	0.718
Radix Bupleuri	169	MOL000169	alpha-Guaiene	Gamma-aminobutyric-acid receptor subunit alpha-6	3284	841		0.953624	0.71
Radix Bupleuri	169	MOL000169	alpha-Guaiene	Muscarinic acetylcholine receptor M3	16	51		0.858305	0.726
Radix Bupleuri	169	MOL000169	alpha-Guaiene	CGMP-inhibited 3',5'-cyclic phosphodiesterase A	172	485		0.837642	0.704
Radix Bupleuri	169	MOL000169	alpha-Guaiene	5-hydroxytryptamine 2A receptor	175	502		0.809785	0.7
Radix Bupleuri	169	MOL000169	alpha-Guaiene	Alpha-1B adrenergic receptor	216	632		0.80543	0.708
Radix Bupleuri	169	MOL000169	alpha-Guaiene	Beta-2 adrenergic receptor	261	766		0.85242	0.726
Radix Bupleuri	169	MOL000169	alpha-Guaiene	Sodium-dependent serotonin transporter	290	824		0.816493	0.702
Radix Bupleuri	1731	MOL001731	Dextrin Corn	Prostaglandin G/H synthase 1	6	20		0.958008	0.778
Radix Bupleuri	1731	MOL001731	Dextrin Corn	Nitric-oxide synthase, brain	28	76		0.94101	0.718
Radix Bupleuri	1731	MOL001731	Dextrin Corn	Prostaglandin G/H synthase 2	94	290		0.9645	0.77
Radix Bupleuri	1731	MOL001731	Dextrin Corn	Glutamate [NMDA] receptor subunit epsilon 1	295	837		0.939766	0.702
Radix Bupleuri	1731	MOL001731	Dextrin Corn	Gamma-aminobutyric acid receptor subunit alpha-1	309	872		0.990557	0.726
Radix Bupleuri	1731	MOL001731	Dextrin Corn	Glycogen phosphorylase, muscle form	350	1152		0.953769	0.722
Radix Bupleuri	1731	MOL001731	Dextrin Corn	Cathepsin D	363	1243		0.972276	0.732
Radix Bupleuri	1731	MOL001731	Dextrin Corn	Pancreatic alpha-amylase	622	4513		0.989489	0.704
Radix Bupleuri	1731	MOL001731	Dextrin Corn	Lactase-phlorizin hydrolase	719	6847		0.991395	0.726
Radix Bupleuri	1731	MOL001731	Dextrin Corn	Cytochrome P450-cam	1143	2298		0.981185	0.704
Radix Bupleuri	1731	MOL001731	Dextrin Corn	Beta-galactosidase	1173	2592		0.984571	0.714
Radix Bupleuri	1731	MOL001731	Dextrin Corn	Ig gamma-1 chain C region	1201	4785		0.984149	0.762
Radix Bupleuri	1731	MOL001731	Dextrin Corn	Ig gamma-2 chain C region	1202	6307		0.972024	0.736
Radix Bupleuri	1731	MOL001731	Dextrin Corn	Neuraminidase	1301	2676		0.991473	0.724
Radix Bupleuri	1731	MOL001731	Dextrin Corn	Ferrichrome-iron receptor	1306	2427		0.997345	0.76
Radix Bupleuri	1731	MOL001731	Dextrin Corn	Cyclomaltodextrin glucanotransferase	1850	2293		0.992567	0.73
Radix Bupleuri	1731	MOL001731	Dextrin Corn	Mannosyl-oligosaccharide alpha-1,2-mannosidase	1863	3258		0.986385	0.71
Radix Bupleuri	1731	MOL001731	Dextrin Corn	Endoglucanase F	1912	2440		0.988754	0.72
Radix Bupleuri	1731	MOL001731	Dextrin Corn	Endoglucanase G	1913	2802		0.99587	0.752
Radix Bupleuri	1731	MOL001731	Dextrin Corn	Bacillolysin	1961	2457		0.997821	0.71
Radix Bupleuri	1731	MOL001731	Dextrin Corn	Mannan endo-1,4-beta-mannosidase	2012	3480		0.990512	0.726
Radix Bupleuri	1731	MOL001731	Dextrin Corn	Chondroitinase AC	2396	2581		0.982473	0.726
Radix Bupleuri	1731	MOL001731	Dextrin Corn	Prostatic acid phosphatase	2998	1859		0.973879	0.708
Radix Bupleuri	1731	MOL001731	Dextrin Corn	Glutamate receptor 2	3216	921		0.976207	0.72
Radix Bupleuri	1731	MOL001731	Dextrin Corn	Gamma-aminobutyric-acid receptor subunit alpha-6	3284	841		0.977562	0.7
Radix Bupleuri	1731	MOL001731	Dextrin Corn	Endoplasmic reticulum mannosyl-oligosaccharide 1,2-alpha-mannosidase	3504	2577		0.984864	0.702
Radix Bupleuri	1731	MOL001731	Dextrin Corn	Alpha-mannosidase 2	3786	5983		0.989805	0.738
Radix Bupleuri	1731	MOL001731	Dextrin Corn	Beta-amylase	1902	3365		0.98213	0.7
Radix Bupleuri	1731	MOL001731	Dextrin Corn	Hyaluronate lyase	2373	2485		0.98007	0.712
Radix Bupleuri	1731	MOL001731	Dextrin Corn	BH0236 protein	2716	4667		0.98456	0.702
Radix Bupleuri	1789	MOL001789	isoliquiritigenin	Prostaglandin G/H synthase 1	6	20		0.879046	0.764
Radix Bupleuri	1789	MOL001789	isoliquiritigenin	Estrogen receptor	46	136		0.921669	0.786
Radix Bupleuri	1789	MOL001789	isoliquiritigenin	Peroxisome proliferator activated receptor gamma	78	238		0.870824	0.758
Radix Bupleuri	1789	MOL001789	isoliquiritigenin	Prostaglandin G/H synthase 2	94	290		0.926081	0.846
Radix Bupleuri	1789	MOL001789	isoliquiritigenin	Carbonic anhydrase II	117	357		0.820359	0.796
Radix Bupleuri	1789	MOL001789	isoliquiritigenin	Beta-2 adrenergic receptor	261	766		0.805155	0.712
Radix Bupleuri	1789	MOL001789	isoliquiritigenin	Estrogen receptor beta	307	869		0.807019	0.718
Radix Bupleuri	1789	MOL001789	isoliquiritigenin	Mitogen-activated protein kinase 14	402	1540		0.897399	0.752
Radix Bupleuri	1789	MOL001789	isoliquiritigenin	Glycogen synthase kinase-3 beta	422	1721		0.875868	0.702
Radix Bupleuri	1789	MOL001789	isoliquiritigenin	Heat shock protein HSP 90	444	1939		0.911192	0.718
Radix Bupleuri	1789	MOL001789	isoliquiritigenin	Cell division protein kinase 2	482	2240		0.871146	0.746
Radix Bupleuri	1789	MOL001789	isoliquiritigenin	Amine oxidase [flavin-containing] B	565	3939		0.912743	0.704
Radix Bupleuri	1789	MOL001789	isoliquiritigenin	mRNA of PKA Catalytic Subunit C-alpha	699	6263		0.891868	0.722
Radix Bupleuri	1789	MOL001789	isoliquiritigenin	cAMP-dependent protein kinase inhibitor alpha	3586	6264		0.804851	0.754
Radix Bupleuri	1789	MOL001789	isoliquiritigenin	Nitric oxide synthase, inducible	3	7		0.871155	0.732
Radix Bupleuri	1789	MOL001789	isoliquiritigenin	Androgen receptor	48	146		0.853478	0.768
Radix Bupleuri	1789	MOL001789	isoliquiritigenin	Phosphatidylinositol-4,5-bisphosphate 3-kinase catalytic subunit, gamma isoform	491	2404		0.931218	0.728
Radix Bupleuri	1789	MOL001789	isoliquiritigenin	Beta-lactamase	499	2478		0.832661	0.714
Radix Bupleuri	1789	MOL001789	isoliquiritigenin	Proto-oncogene serine/threonine-protein kinase Pim-1	2966	2347		0.855908	0.726
Radix Bupleuri	1789	MOL001789	isoliquiritigenin	Cyclin-A2	3025	6235		0.937968	0.704
Radix Bupleuri	1789	MOL001789	isoliquiritigenin	Nuclear receptor coactivator 2	3276	6241		0.801445	0.79
Radix Bupleuri	1789	MOL001789	isoliquiritigenin	Proto-oncogene c-Fos	4478	h001	validated	null	null
Radix Bupleuri	1789	MOL001789	isoliquiritigenin	Apoptosis regulator BAX	4033	h001	validated	null	null
Radix Bupleuri	1789	MOL001789	isoliquiritigenin	E-selectin	427	1756	validated	null	null
Radix Bupleuri	1789	MOL001789	isoliquiritigenin	Vascular cell adhesion protein 1	440	1908	validated	null	null
Radix Bupleuri	1789	MOL001789	isoliquiritigenin	Gamma-aminobutyric acid type B receptor subunit 1	4222	h001	validated	null	null
Radix Bupleuri	1789	MOL001789	isoliquiritigenin	Tyrosinase	4590	h001	validated	null	null
Radix Bupleuri	1789	MOL001789	isoliquiritigenin	Junctional adhesion molecule A	4306	h001	validated	null	null
Radix Bupleuri	1789	MOL001789	isoliquiritigenin	Tyrosine-protein kinase JAK2	601	4173	validated	null	null
Radix Bupleuri	1789	MOL001789	isoliquiritigenin	Metallothionein-2	4345	h001	validated	null	null
Radix Bupleuri	1789	MOL001789	isoliquiritigenin	Solute carrier family 2, facilitated glucose transporter member 1	4533	h001	validated	null	null
Radix Bupleuri	18	MOL000018	(+/-)-Isoborneol	Cytochrome P450-cam	1143	2298		0.92565	0.798
Radix Bupleuri	18	MOL000018	(+/-)-Isoborneol	Gamma-aminobutyric-acid receptor alpha-2 subunit	141	423		0.955653	0.714
Radix Bupleuri	18	MOL000018	(+/-)-Isoborneol	Muscarinic acetylcholine receptor M2	210	617		0.919123	0.7
Radix Bupleuri	18	MOL000018	(+/-)-Isoborneol	Gamma-aminobutyric acid receptor subunit alpha-1	309	872		0.911672	0.746
Radix Bupleuri	18	MOL000018	(+/-)-Isoborneol	Muscarinic acetylcholine receptor M3	16	51		0.97269	0.728
Radix Bupleuri	18	MOL000018	(+/-)-Isoborneol	Muscarinic acetylcholine receptor M1	38	103		0.970655	0.71
Radix Bupleuri	18	MOL000018	(+/-)-Isoborneol	Prostaglandin G/H synthase 2	94	290		0.889333	0.716
Radix Bupleuri	18	MOL000018	(+/-)-Isoborneol	Gamma-aminobutyric-acid receptor alpha-5 subunit	181	523		0.984184	0.708
Radix Bupleuri	18	MOL000018	(+/-)-Isoborneol	Sodium-dependent noradrenaline transporter	186	540		0.969915	0.7
Radix Bupleuri	18	MOL000018	(+/-)-Isoborneol	Alpha-1A adrenergic receptor	191	556		0.895085	0.716
Radix Bupleuri	18	MOL000018	(+/-)-Isoborneol	Gamma-aminobutyric-acid receptor alpha-3 subunit	200	580		0.976011	0.724
Radix Bupleuri	18	MOL000018	(+/-)-Isoborneol	Gamma-aminobutyric-acid receptor subunit alpha-6	3284	841		0.969568	0.722
Radix Bupleuri	18	MOL000018	(+/-)-Isoborneol	Progesterone receptor	209	614		0.901429	0.7
Radix Bupleuri	19	MOL000019	D-Camphene	Gamma-aminobutyric-acid receptor alpha-2 subunit	141	423		0.97279	0.706
Radix Bupleuri	19	MOL000019	D-Camphene	Gamma-aminobutyric acid receptor subunit alpha-1	309	872		0.92752	0.708
Radix Bupleuri	19	MOL000019	D-Camphene	Cytochrome P450-cam	1143	2298		0.90336	0.808
Radix Bupleuri	19	MOL000019	D-Camphene	Potassium voltage-gated channel subfamily H member 2	37	101		0.963193	0.706
Radix Bupleuri	19	MOL000019	D-Camphene	Sodium channel protein type 5 subunit alpha	70	220		0.980498	0.702
Radix Bupleuri	19	MOL000019	D-Camphene	Coagulation factor Xa	79	239		0.92211	0.708
Radix Bupleuri	19	MOL000019	D-Camphene	Prostaglandin G/H synthase 2	94	290		0.918009	0.724
Radix Bupleuri	19	MOL000019	D-Camphene	DNA topoisomerase II	287	817		0.879892	0.704
Radix Bupleuri	19	MOL000019	D-Camphene	Nuclear receptor coactivator 2	3276	6241		0.818001	0.738
Radix Bupleuri	19	MOL000019	D-Camphene	Calcium-activated potassium channel subunit alpha 1	3727	610		0.951105	0.708
Radix Bupleuri	19	MOL000019	D-Camphene	Calmodulin	3907	465		0.814771	0.716
Radix Bupleuri	193	MOL000193	(Z)-caryophyllene	Prostaglandin G/H synthase 1	6	20		0.943684	0.704
Radix Bupleuri	193	MOL000193	(Z)-caryophyllene	Muscarinic acetylcholine receptor M3	16	51		0.972355	0.73
Radix Bupleuri	193	MOL000193	(Z)-caryophyllene	Muscarinic acetylcholine receptor M1	38	103		0.965808	0.722
Radix Bupleuri	193	MOL000193	(Z)-caryophyllene	Prostaglandin G/H synthase 2	94	290		0.961471	0.734
Radix Bupleuri	193	MOL000193	(Z)-caryophyllene	Gamma-aminobutyric-acid receptor alpha-2 subunit	141	423		0.979399	0.718
Radix Bupleuri	193	MOL000193	(Z)-caryophyllene	Sodium-dependent noradrenaline transporter	186	540		0.957032	0.704
Radix Bupleuri	193	MOL000193	(Z)-caryophyllene	Alpha-1A adrenergic receptor	191	556		0.873437	0.706
Radix Bupleuri	193	MOL000193	(Z)-caryophyllene	Muscarinic acetylcholine receptor M2	210	617		0.960055	0.742
Radix Bupleuri	193	MOL000193	(Z)-caryophyllene	Alpha-1B adrenergic receptor	216	632		0.934162	0.736
Radix Bupleuri	193	MOL000193	(Z)-caryophyllene	Gamma-aminobutyric acid receptor subunit alpha-1	309	872		0.984454	0.726
Radix Bupleuri	193	MOL000193	(Z)-caryophyllene	Nuclear receptor coactivator 2	3276	6241		0.888724	0.722
Radix Bupleuri	193	MOL000193	(Z)-caryophyllene	Gamma-aminobutyric-acid receptor subunit alpha-6	3284	841		0.968244	0.718
Radix Bupleuri	193	MOL000193	(Z)-caryophyllene	Beta-2 adrenergic receptor	261	766		0.81229	0.702
Radix Bupleuri	193	MOL000193	(Z)-caryophyllene	Neuronal acetylcholine receptor subunit alpha-2	284	813		0.93619	0.7
Radix Bupleuri	193	MOL000193	(Z)-caryophyllene	Sodium-dependent dopamine transporter	239	713		0.929944	0.702
Radix Bupleuri	196	MOL000196	L-Bornyl acetate	Muscarinic acetylcholine receptor M3	16	51		0.932732	0.748
Radix Bupleuri	196	MOL000196	L-Bornyl acetate	Muscarinic acetylcholine receptor M1	38	103		0.932643	0.734
Radix Bupleuri	196	MOL000196	L-Bornyl acetate	Gamma-aminobutyric-acid receptor alpha-2 subunit	141	423		0.964852	0.734
Radix Bupleuri	196	MOL000196	L-Bornyl acetate	Gamma-aminobutyric-acid receptor alpha-5 subunit	181	523		0.955403	0.7
Radix Bupleuri	196	MOL000196	L-Bornyl acetate	Gamma-aminobutyric-acid receptor alpha-3 subunit	200	580		0.94184	0.716
Radix Bupleuri	196	MOL000196	L-Bornyl acetate	Muscarinic acetylcholine receptor M2	210	617		0.946757	0.738
Radix Bupleuri	196	MOL000196	L-Bornyl acetate	Alpha-1B adrenergic receptor	216	632		0.835731	0.712
Radix Bupleuri	196	MOL000196	L-Bornyl acetate	Gamma-aminobutyric acid receptor subunit alpha-1	309	872		0.953983	0.762
Radix Bupleuri	196	MOL000196	L-Bornyl acetate	Glutamate receptor 2	3216	921		0.922957	0.716
Radix Bupleuri	196	MOL000196	L-Bornyl acetate	Gamma-aminobutyric-acid receptor subunit alpha-6	3284	841		0.931968	0.718
Radix Bupleuri	196	MOL000196	L-Bornyl acetate	Prostaglandin G/H synthase 2	94	290		0.8932	0.71
Radix Bupleuri	196	MOL000196	L-Bornyl acetate	DNA topoisomerase II	287	817		0.864581	0.706
Radix Bupleuri	196	MOL000196	L-Bornyl acetate	Gamma-aminobutyric-acid receptor subunit alpha-4	3529	530		0.9116	0.702
Radix Bupleuri	196	MOL000196	L-Bornyl acetate	Neuronal acetylcholine receptor subunit alpha-2	284	813		0.813062	0.702
Radix Bupleuri	196	MOL000196	L-Bornyl acetate	Cytochrome P450-cam	1143	2298		0.927436	0.754
Radix Bupleuri	196	MOL000196	L-Bornyl acetate	Dopamine D1 receptor	7	23		0.80111	0.708
Radix Bupleuri	196	MOL000196	L-Bornyl acetate	Alpha-2A adrenergic receptor	105	318		0.851708	0.702
Radix Bupleuri	196	MOL000196	L-Bornyl acetate	Sodium-dependent noradrenaline transporter	186	540		0.860861	0.7
Radix Bupleuri	197	MOL000197	Myrcene	Alcohol dehydrogenase 1C	727	517		0.81705	0.712
Radix Bupleuri	197	MOL000197	Myrcene	Gamma-aminobutyric acid receptor subunit alpha-1	309	872		0.857035	0.7
Radix Bupleuri	1972	MOL001972	Pulegone	Gamma-aminobutyric-acid receptor alpha-2 subunit	141	423		0.968347	0.712
Radix Bupleuri	1972	MOL001972	Pulegone	Gamma-aminobutyric acid receptor subunit alpha-1	309	872		0.936734	0.736
Radix Bupleuri	1972	MOL001972	Pulegone	Cytochrome P450-cam	1143	2298		0.90359	0.728
Radix Bupleuri	1972	MOL001972	Pulegone	Gamma-aminobutyric-acid receptor alpha-5 subunit	181	523		0.94834	0.704
Radix Bupleuri	1972	MOL001972	Pulegone	Muscarinic acetylcholine receptor M2	210	617		0.92591	0.7
Radix Bupleuri	1972	MOL001972	Pulegone	Muscarinic acetylcholine receptor M1	38	103		0.93932	0.704
Radix Bupleuri	1972	MOL001972	Pulegone	Sodium-dependent noradrenaline transporter	186	540		0.9404	0.7
Radix Bupleuri	1972	MOL001972	Pulegone	Gamma-aminobutyric-acid receptor subunit alpha-6	3284	841		0.90077	0.702
Radix Bupleuri	198	MOL000198	(R)-linalool	Muscarinic acetylcholine receptor M1	38	103		0.822903	0.718
Radix Bupleuri	198	MOL000198	(R)-linalool	Gamma-aminobutyric-acid receptor alpha-2 subunit	141	423		0.823662	0.71
Radix Bupleuri	198	MOL000198	(R)-linalool	Muscarinic acetylcholine receptor M2	210	617		0.872934	0.728
Radix Bupleuri	198	MOL000198	(R)-linalool	Gamma-aminobutyric-acid receptor alpha-3 subunit	200	580		0.828085	0.704
Radix Bupleuri	198	MOL000198	(R)-linalool	Gamma-aminobutyric-acid receptor subunit alpha-6	3284	841		0.854813	0.706
Radix Bupleuri	198	MOL000198	(R)-linalool	Prostaglandin G/H synthase 1	6	20		0.942767	0.724
Radix Bupleuri	198	MOL000198	(R)-linalool	Potassium voltage-gated channel subfamily H member 2	37	101		0.934488	0.7
Radix Bupleuri	198	MOL000198	(R)-linalool	Sodium channel protein type 5 subunit alpha	70	220		0.96873	0.702
Radix Bupleuri	198	MOL000198	(R)-linalool	Coagulation factor Xa	79	239		0.882487	0.71
Radix Bupleuri	198	MOL000198	(R)-linalool	Prostaglandin G/H synthase 2	94	290		0.940315	0.758
Radix Bupleuri	198	MOL000198	(R)-linalool	Vascular endothelial growth factor receptor 2	139	407		0.935622	0.702
Radix Bupleuri	198	MOL000198	(R)-linalool	DNA topoisomerase II	287	817		0.89719	0.73
Radix Bupleuri	198	MOL000198	(R)-linalool	Heat shock protein HSP 90	444	1939		0.974434	0.704
Radix Bupleuri	198	MOL000198	(R)-linalool	Nuclear receptor coactivator 2	3276	6241		0.804371	0.764
Radix Bupleuri	198	MOL000198	(R)-linalool	Calcium-activated potassium channel subunit alpha 1	3727	610		0.928285	0.702
Radix Bupleuri	198	MOL000198	(R)-linalool	Muscarinic acetylcholine receptor M3	16	51		0.800818	0.71
Radix Bupleuri	198	MOL000198	(R)-linalool	Gamma-aminobutyric-acid receptor alpha-5 subunit	181	523		0.919019	0.704
Radix Bupleuri	198	MOL000198	(R)-linalool	Gamma-aminobutyric acid receptor subunit alpha-1	309	872		0.877385	0.776
Radix Bupleuri	198	MOL000198	(R)-linalool	Sodium-dependent noradrenaline transporter	186	540		0.801123	0.704
Radix Bupleuri	198	MOL000198	(R)-linalool	Progesterone receptor	209	614		0.847707	0.704
Radix Bupleuri	1999	MOL001999	scoparone	Prostaglandin G/H synthase 1	6	20		0.90578	0.796
Radix Bupleuri	1999	MOL001999	scoparone	Thrombin	17	54		0.83321	0.778
Radix Bupleuri	1999	MOL001999	scoparone	Muscarinic acetylcholine receptor M1	38	103		0.81727	0.72
Radix Bupleuri	1999	MOL001999	scoparone	Prostaglandin G/H synthase 2	94	290		0.92072	0.812
Radix Bupleuri	1999	MOL001999	scoparone	Beta-2 adrenergic receptor	261	766		0.8207	0.71
Radix Bupleuri	1999	MOL001999	scoparone	Sodium-dependent serotonin transporter	290	824		0.8134	0.712
Radix Bupleuri	1999	MOL001999	scoparone	Gamma-aminobutyric acid receptor subunit alpha-1	309	872		0.80319	0.732
Radix Bupleuri	1999	MOL001999	scoparone	Leukotriene A-4 hydrolase	521	3060		0.82302	0.71
Radix Bupleuri	1999	MOL001999	scoparone	Amine oxidase [flavin-containing] B	565	3939		0.89247	0.748
Radix Bupleuri	1999	MOL001999	scoparone	mRNA of PKA Catalytic Subunit C-alpha	699	6263		0.83308	0.708
Radix Bupleuri	1999	MOL001999	scoparone	Glutamate receptor 2	3216	921		0.84078	0.702
Radix Bupleuri	1999	MOL001999	scoparone	cAMP-dependent protein kinase inhibitor alpha	3586	6264		0.813153	0.726
Radix Bupleuri	1999	MOL001999	scoparone	Transcription factor p65	4565	h001	validated	null	null
Radix Bupleuri	1999	MOL001999	scoparone	NF-kappa-B inhibitor alpha	4394	h001	validated	null	null
Radix Bupleuri	1999	MOL001999	scoparone	C-C motif chemokine 2	417	1649	validated	null	null
Radix Bupleuri	1999	MOL001999	scoparone	Interleukin-8	4303	h001	validated	null	null
Radix Bupleuri	1999	MOL001999	scoparone	Tyrosinase	4590	h001	validated	null	null
Radix Bupleuri	1999	MOL001999	scoparone	5,6-dihydroxyindole-2-carboxylic acid oxidase	4000	h001	validated	null	null
Radix Bupleuri	1999	MOL001999	scoparone	L-dopachrome tautomerase	4315	h001	validated	null	null
Radix Bupleuri	2002	MOL002002	cis-Carveol	Gamma-aminobutyric-acid receptor alpha-2 subunit	141	423		0.95034	0.702
Radix Bupleuri	2002	MOL002002	cis-Carveol	Sodium-dependent noradrenaline transporter	186	540		0.85345	0.712
Radix Bupleuri	2002	MOL002002	cis-Carveol	Muscarinic acetylcholine receptor M2	210	617		0.82751	0.704
Radix Bupleuri	2002	MOL002002	cis-Carveol	Gamma-aminobutyric acid receptor subunit alpha-1	309	872		0.88948	0.73
Radix Bupleuri	2002	MOL002002	cis-Carveol	Muscarinic acetylcholine receptor M1	38	103		0.84825	0.7
Radix Bupleuri	2002	MOL002002	cis-Carveol	Gamma-aminobutyric-acid receptor alpha-3 subunit	200	580		0.87864	0.7
Radix Bupleuri	2029	MOL002029	()-Cuparene	Muscarinic acetylcholine receptor M3	16	51		0.931709	0.748
Radix Bupleuri	2029	MOL002029	()-Cuparene	Thrombin	17	54		0.872324	0.766
Radix Bupleuri	2029	MOL002029	()-Cuparene	Muscarinic acetylcholine receptor M1	38	103		0.932176	0.744
Radix Bupleuri	2029	MOL002029	()-Cuparene	Gamma-aminobutyric-acid receptor alpha-2 subunit	141	423		0.964194	0.736
Radix Bupleuri	2029	MOL002029	()-Cuparene	Acetylcholinesterase	165	474		0.863858	0.756
Radix Bupleuri	2029	MOL002029	()-Cuparene	Gamma-aminobutyric-acid receptor alpha-5 subunit	181	523		0.954711	0.702
Radix Bupleuri	2029	MOL002029	()-Cuparene	Gamma-aminobutyric-acid receptor alpha-3 subunit	200	580		0.941034	0.718
Radix Bupleuri	2029	MOL002029	()-Cuparene	Muscarinic acetylcholine receptor M2	210	617		0.946158	0.738
Radix Bupleuri	2029	MOL002029	()-Cuparene	Alpha-1B adrenergic receptor	216	632		0.834419	0.714
Radix Bupleuri	2029	MOL002029	()-Cuparene	Gamma-aminobutyric acid receptor subunit alpha-1	309	872		0.953193	0.76
Radix Bupleuri	2029	MOL002029	()-Cuparene	Dipeptidyl peptidase IV	332	952		0.91334	0.756
Radix Bupleuri	2029	MOL002029	()-Cuparene	Glutamate receptor 2	3216	921		0.921286	0.72
Radix Bupleuri	2029	MOL002029	()-Cuparene	Gamma-aminobutyric-acid receptor subunit alpha-6	3284	841		0.931051	0.722
Radix Bupleuri	2029	MOL002029	()-Cuparene	Prostaglandin G/H synthase 1	6	20		0.817048	0.744
Radix Bupleuri	2029	MOL002029	()-Cuparene	Dopamine D1 receptor	7	23		0.876459	0.712
Radix Bupleuri	2029	MOL002029	()-Cuparene	Sodium channel protein type 5 subunit alpha	70	220		0.849319	0.722
Radix Bupleuri	2029	MOL002029	()-Cuparene	Prostaglandin G/H synthase 2	94	290		0.831086	0.784
Radix Bupleuri	2029	MOL002029	()-Cuparene	Retinoic acid receptor RXR-alpha	158	459		0.881654	0.716
Radix Bupleuri	2029	MOL002029	()-Cuparene	Sodium-dependent noradrenaline transporter	186	540		0.925393	0.758
Radix Bupleuri	2029	MOL002029	()-Cuparene	Alpha-1A adrenergic receptor	191	556		0.910746	0.734
Radix Bupleuri	2029	MOL002029	()-Cuparene	Sodium-dependent dopamine transporter	239	713		0.921872	0.734
Radix Bupleuri	2029	MOL002029	()-Cuparene	Beta-2 adrenergic receptor	261	766		0.92507	0.716
Radix Bupleuri	2029	MOL002029	()-Cuparene	Sodium-dependent serotonin transporter	290	824		0.943903	0.728
Radix Bupleuri	2029	MOL002029	()-Cuparene	CGMP-inhibited 3',5'-cyclic phosphodiesterase A	172	485		0.89232	0.7
Radix Bupleuri	2029	MOL002029	()-Cuparene	Alpha-1D adrenergic receptor	272	789		0.85302	0.702
Radix Bupleuri	2029	MOL002029	()-Cuparene	Neuronal acetylcholine receptor subunit alpha-2	284	813		0.83546	0.7
Radix Bupleuri	2029	MOL002029	()-Cuparene	Estrogen receptor	46	136		0.80046	0.738
Radix Bupleuri	2029	MOL002029	()-Cuparene	Alpha-2A adrenergic receptor	105	318		0.86605	0.702
Radix Bupleuri	2042	MOL002042	thymol	Prostaglandin G/H synthase 1	6	20		0.809844	0.712
Radix Bupleuri	2042	MOL002042	thymol	Muscarinic acetylcholine receptor M1	38	103		0.902028	0.7
Radix Bupleuri	2042	MOL002042	thymol	Beta-1 adrenergic receptor	63	193		0.820763	0.706
Radix Bupleuri	2042	MOL002042	thymol	Prostaglandin G/H synthase 2	94	290		0.807131	0.792
Radix Bupleuri	2042	MOL002042	thymol	Alpha-2C adrenergic receptor	126	378		0.851239	0.702
Radix Bupleuri	2042	MOL002042	thymol	Sodium-dependent noradrenaline transporter	186	540		0.913938	0.712
Radix Bupleuri	2042	MOL002042	thymol	Alpha-1A adrenergic receptor	191	556		0.845459	0.708
Radix Bupleuri	2042	MOL002042	thymol	Sodium-dependent dopamine transporter	239	713		0.884231	0.704
Radix Bupleuri	2042	MOL002042	thymol	Beta-2 adrenergic receptor	261	766		0.847808	0.712
Radix Bupleuri	2042	MOL002042	thymol	Lysozyme	1172	2300		0.830971	0.732
Radix Bupleuri	2042	MOL002042	thymol	Muscarinic acetylcholine receptor M3	16	51		0.85278	0.708
Radix Bupleuri	2042	MOL002042	thymol	Muscarinic acetylcholine receptor M2	210	617		0.905679	0.702
Radix Bupleuri	2042	MOL002042	thymol	Alpha-1B adrenergic receptor	216	632		0.885612	0.704
Radix Bupleuri	2042	MOL002042	thymol	Alpha-1D adrenergic receptor	272	789		0.814934	0.7
Radix Bupleuri	2042	MOL002042	thymol	Gamma-aminobutyric-acid receptor alpha-2 subunit	141	423		0.803566	0.702
Radix Bupleuri	2042	MOL002042	thymol	Neutrophil elastase	4392	h001	validated	null	null
Radix Bupleuri	2046	MOL002046	hexanoic acid	Alcohol dehydrogenase 1C	727	517		0.832436	0.752
Radix Bupleuri	2046	MOL002046	hexanoic acid	Trypsin-3	3952	2886		0.802037	0.736
Radix Bupleuri	2046	MOL002046	hexanoic acid	Bacillolysin	1961	2457		0.841836	0.714
Radix Bupleuri	2046	MOL002046	hexanoic acid	Inositol-3-phosphate synthase 1	4272	h001	validated	null	null
Radix Bupleuri	207	MOL000207	Methyleugenol	Prostaglandin G/H synthase 1	6	20		0.86684	0.764
Radix Bupleuri	207	MOL000207	Methyleugenol	Dopamine D1 receptor	7	23		0.88771	0.708
Radix Bupleuri	207	MOL000207	Methyleugenol	Muscarinic acetylcholine receptor M3	16	51		0.8845	0.754
Radix Bupleuri	207	MOL000207	Methyleugenol	Muscarinic acetylcholine receptor M1	38	103		0.92738	0.758
Radix Bupleuri	207	MOL000207	Methyleugenol	Beta-1 adrenergic receptor	63	193		0.90127	0.738
Radix Bupleuri	207	MOL000207	Methyleugenol	Sodium channel protein type 5 subunit alpha	70	220		0.8082	0.722
Radix Bupleuri	207	MOL000207	Methyleugenol	Prostaglandin G/H synthase 2	94	290		0.88619	0.82
Radix Bupleuri	207	MOL000207	Methyleugenol	Nitric-oxide synthase, endothelial	95	291		0.85006	0.774
Radix Bupleuri	207	MOL000207	Methyleugenol	Alpha-2A adrenergic receptor	105	318		0.92906	0.728
Radix Bupleuri	207	MOL000207	Methyleugenol	Alpha-2C adrenergic receptor	126	378		0.89807	0.764
Radix Bupleuri	207	MOL000207	Methyleugenol	5-hydroxytryptamine 2A receptor	175	502		0.87329	0.702
Radix Bupleuri	207	MOL000207	Methyleugenol	Sodium-dependent noradrenaline transporter	186	540		0.93953	0.744
Radix Bupleuri	207	MOL000207	Methyleugenol	Alpha-1A adrenergic receptor	191	556		0.92953	0.762
Radix Bupleuri	207	MOL000207	Methyleugenol	Muscarinic acetylcholine receptor M2	210	617		0.94519	0.722
Radix Bupleuri	207	MOL000207	Methyleugenol	Alpha-2B adrenergic receptor	214	629		0.94302	0.704
Radix Bupleuri	207	MOL000207	Methyleugenol	Alpha-1B adrenergic receptor	216	632		0.91525	0.734
Radix Bupleuri	207	MOL000207	Methyleugenol	Sodium-dependent dopamine transporter	239	713		0.9358	0.73
Radix Bupleuri	207	MOL000207	Methyleugenol	Beta-2 adrenergic receptor	261	766		0.91498	0.728
Radix Bupleuri	207	MOL000207	Methyleugenol	Alpha-1D adrenergic receptor	272	789		0.86057	0.72
Radix Bupleuri	207	MOL000207	Methyleugenol	Beta-lactamase	499	2478		0.85922	0.728
Radix Bupleuri	207	MOL000207	Methyleugenol	Amine oxidase [flavin-containing] B	565	3939		0.90135	0.768
Radix Bupleuri	207	MOL000207	Methyleugenol	Leukotriene A-4 hydrolase	521	3060		0.835885	0.7
Radix Bupleuri	207	MOL000207	Methyleugenol	Sodium-dependent serotonin transporter	290	824		0.92533	0.7
Radix Bupleuri	207	MOL000207	Methyleugenol	Urokinase-type plasminogen activator	346	1074		0.842772	0.712
Radix Bupleuri	207	MOL000207	Methyleugenol	cAMP-dependent protein kinase inhibitor alpha	3586	6264		0.818135	0.72
Radix Bupleuri	2085	MOL002085	alpha-Cubebene	Muscarinic acetylcholine receptor M3	16	51		0.941011	0.706
Radix Bupleuri	2085	MOL002085	alpha-Cubebene	Muscarinic acetylcholine receptor M1	38	103		0.92656	0.706
Radix Bupleuri	2085	MOL002085	alpha-Cubebene	Prostaglandin G/H synthase 2	94	290		0.883578	0.7
Radix Bupleuri	2085	MOL002085	alpha-Cubebene	Muscarinic acetylcholine receptor M2	210	617		0.927785	0.708
Radix Bupleuri	2085	MOL002085	alpha-Cubebene	Neuronal acetylcholine receptor subunit alpha-2	284	813		0.868212	0.7
Radix Bupleuri	2085	MOL002085	alpha-Cubebene	Gamma-aminobutyric acid receptor subunit alpha-1	309	872		0.952892	0.702
Radix Bupleuri	2095	MOL002095	DEP	Muscarinic acetylcholine receptor M3	16	51		0.815835	0.724
Radix Bupleuri	2095	MOL002095	DEP	Muscarinic acetylcholine receptor M1	38	103		0.824322	0.732
Radix Bupleuri	2095	MOL002095	DEP	Alpha-2B adrenergic receptor	214	629		0.829754	0.7
Radix Bupleuri	2095	MOL002095	DEP	Beta-2 adrenergic receptor	261	766		0.80695	0.716
Radix Bupleuri	2095	MOL002095	DEP	Sodium-dependent serotonin transporter	290	824		0.820413	0.72
Radix Bupleuri	2095	MOL002095	DEP	Gamma-aminobutyric acid receptor subunit alpha-1	309	872		0.825089	0.716
Radix Bupleuri	2095	MOL002095	DEP	Sodium-dependent noradrenaline transporter	186	540		0.81371	0.712
Radix Bupleuri	2107	MOL002107	Valerophenone	Prostaglandin G/H synthase 1	6	20		0.85054	0.758
Radix Bupleuri	2107	MOL002107	Valerophenone	Muscarinic acetylcholine receptor M3	16	51		0.83304	0.714
Radix Bupleuri	2107	MOL002107	Valerophenone	Muscarinic acetylcholine receptor M1	38	103		0.91193	0.716
Radix Bupleuri	2107	MOL002107	Valerophenone	Beta-1 adrenergic receptor	63	193		0.90795	0.706
Radix Bupleuri	2107	MOL002107	Valerophenone	Sodium channel protein type 5 subunit alpha	70	220		0.85863	0.72
Radix Bupleuri	2107	MOL002107	Valerophenone	Prostaglandin G/H synthase 2	94	290		0.85911	0.834
Radix Bupleuri	2107	MOL002107	Valerophenone	Alpha-2C adrenergic receptor	126	378		0.88733	0.718
Radix Bupleuri	2107	MOL002107	Valerophenone	Sodium-dependent noradrenaline transporter	186	540		0.9272	0.74
Radix Bupleuri	2107	MOL002107	Valerophenone	Alpha-1A adrenergic receptor	191	556		0.87873	0.726
Radix Bupleuri	2107	MOL002107	Valerophenone	Alpha-1B adrenergic receptor	216	632		0.88137	0.712
Radix Bupleuri	2107	MOL002107	Valerophenone	Sodium-dependent dopamine transporter	239	713		0.91077	0.714
Radix Bupleuri	2107	MOL002107	Valerophenone	Beta-2 adrenergic receptor	261	766		0.87484	0.738
Radix Bupleuri	2107	MOL002107	Valerophenone	Amine oxidase [flavin-containing] B	565	3939		0.84342	0.758
Radix Bupleuri	2107	MOL002107	Valerophenone	Amine oxidase [flavin-containing] A	566	3941		0.85675	0.71
Radix Bupleuri	2111	MOL002111	BdPh	Prostaglandin G/H synthase 1	6	20		0.87744	0.79
Radix Bupleuri	2111	MOL002111	BdPh	Muscarinic acetylcholine receptor M3	16	51		0.85041	0.764
Radix Bupleuri	2111	MOL002111	BdPh	Muscarinic acetylcholine receptor M1	38	103		0.90673	0.754
Radix Bupleuri	2111	MOL002111	BdPh	Beta-1 adrenergic receptor	63	193		0.85427	0.73
Radix Bupleuri	2111	MOL002111	BdPh	Sodium channel protein type 5 subunit alpha	70	220		0.86567	0.756
Radix Bupleuri	2111	MOL002111	BdPh	Prostaglandin G/H synthase 2	94	290		0.89031	0.846
Radix Bupleuri	2111	MOL002111	BdPh	Alpha-2A adrenergic receptor	105	318		0.8495	0.722
Radix Bupleuri	2111	MOL002111	BdPh	Alpha-2C adrenergic receptor	126	378		0.81599	0.762
Radix Bupleuri	2111	MOL002111	BdPh	CGMP-inhibited 3',5'-cyclic phosphodiesterase A	172	485		0.8492	0.714
Radix Bupleuri	2111	MOL002111	BdPh	5-hydroxytryptamine 2A receptor	175	502		0.82714	0.712
Radix Bupleuri	2111	MOL002111	BdPh	Sodium-dependent noradrenaline transporter	186	540		0.88252	0.732
Radix Bupleuri	2111	MOL002111	BdPh	Alpha-1A adrenergic receptor	191	556		0.81253	0.758
Radix Bupleuri	2111	MOL002111	BdPh	Muscarinic acetylcholine receptor M2	210	617		0.88993	0.734
Radix Bupleuri	2111	MOL002111	BdPh	Alpha-2B adrenergic receptor	214	629		0.91331	0.72
Radix Bupleuri	2111	MOL002111	BdPh	Alpha-1B adrenergic receptor	216	632		0.82647	0.748
Radix Bupleuri	2111	MOL002111	BdPh	Sodium-dependent dopamine transporter	239	713		0.83845	0.74
Radix Bupleuri	2111	MOL002111	BdPh	Beta-2 adrenergic receptor	261	766		0.88823	0.746
Radix Bupleuri	2111	MOL002111	BdPh	Sodium-dependent serotonin transporter	290	824		0.86977	0.732
Radix Bupleuri	2111	MOL002111	BdPh	Gamma-aminobutyric acid receptor subunit alpha-1	309	872		0.83907	0.75
Radix Bupleuri	2111	MOL002111	BdPh	Amine oxidase [flavin-containing] B	565	3939		0.84097	0.75
Radix Bupleuri	2111	MOL002111	BdPh	Amine oxidase [flavin-containing] A	566	3941		0.82558	0.716
Radix Bupleuri	2111	MOL002111	BdPh	mRNA of PKA Catalytic Subunit C-alpha	699	6263		0.85045	0.742
Radix Bupleuri	2111	MOL002111	BdPh	Retinoic acid receptor RXR-alpha	158	459		0.83332	0.7
Radix Bupleuri	2111	MOL002111	BdPh	cAMP-dependent protein kinase inhibitor alpha	3586	6264		0.80496	0.742
Radix Bupleuri	2116	MOL002116	(1R,4S,5R)-4-isopropenyl-1,8-dimethylspiro[4.5]dec-8-ene	Prostaglandin G/H synthase 1	6	20		0.944166	0.704
Radix Bupleuri	2116	MOL002116	(1R,4S,5R)-4-isopropenyl-1,8-dimethylspiro[4.5]dec-8-ene	Muscarinic acetylcholine receptor M3	16	51		0.96964	0.71
Radix Bupleuri	2116	MOL002116	(1R,4S,5R)-4-isopropenyl-1,8-dimethylspiro[4.5]dec-8-ene	Muscarinic acetylcholine receptor M1	38	103		0.958593	0.722
Radix Bupleuri	2116	MOL002116	(1R,4S,5R)-4-isopropenyl-1,8-dimethylspiro[4.5]dec-8-ene	Prostaglandin G/H synthase 2	94	290		0.967778	0.738
Radix Bupleuri	2116	MOL002116	(1R,4S,5R)-4-isopropenyl-1,8-dimethylspiro[4.5]dec-8-ene	Gamma-aminobutyric-acid receptor alpha-2 subunit	141	423		0.978237	0.728
Radix Bupleuri	2116	MOL002116	(1R,4S,5R)-4-isopropenyl-1,8-dimethylspiro[4.5]dec-8-ene	Retinoic acid receptor RXR-alpha	158	459		0.936632	0.728
Radix Bupleuri	2116	MOL002116	(1R,4S,5R)-4-isopropenyl-1,8-dimethylspiro[4.5]dec-8-ene	Sodium-dependent noradrenaline transporter	186	540		0.957942	0.72
Radix Bupleuri	2116	MOL002116	(1R,4S,5R)-4-isopropenyl-1,8-dimethylspiro[4.5]dec-8-ene	Alpha-1A adrenergic receptor	191	556		0.866499	0.704
Radix Bupleuri	2116	MOL002116	(1R,4S,5R)-4-isopropenyl-1,8-dimethylspiro[4.5]dec-8-ene	Muscarinic acetylcholine receptor M2	210	617		0.956809	0.718
Radix Bupleuri	2116	MOL002116	(1R,4S,5R)-4-isopropenyl-1,8-dimethylspiro[4.5]dec-8-ene	Alpha-1B adrenergic receptor	216	632		0.929542	0.714
Radix Bupleuri	2116	MOL002116	(1R,4S,5R)-4-isopropenyl-1,8-dimethylspiro[4.5]dec-8-ene	Gamma-aminobutyric acid receptor subunit alpha-1	309	872		0.983845	0.73
Radix Bupleuri	2116	MOL002116	(1R,4S,5R)-4-isopropenyl-1,8-dimethylspiro[4.5]dec-8-ene	Nuclear receptor coactivator 2	3276	6241		0.903376	0.75
Radix Bupleuri	2116	MOL002116	(1R,4S,5R)-4-isopropenyl-1,8-dimethylspiro[4.5]dec-8-ene	Gamma-aminobutyric-acid receptor subunit alpha-6	3284	841		0.970296	0.734
Radix Bupleuri	2138	MOL002138	p-Cymen-8-ol	Muscarinic acetylcholine receptor M1	38	103		0.88101	0.74
Radix Bupleuri	2138	MOL002138	p-Cymen-8-ol	Beta-1 adrenergic receptor	63	193		0.84168	0.722
Radix Bupleuri	2138	MOL002138	p-Cymen-8-ol	Alpha-2C adrenergic receptor	126	378		0.85766	0.716
Radix Bupleuri	2138	MOL002138	p-Cymen-8-ol	Sodium-dependent noradrenaline transporter	186	540		0.87381	0.736
Radix Bupleuri	2138	MOL002138	p-Cymen-8-ol	Alpha-1A adrenergic receptor	191	556		0.86406	0.748
Radix Bupleuri	2138	MOL002138	p-Cymen-8-ol	Muscarinic acetylcholine receptor M2	210	617		0.90164	0.712
Radix Bupleuri	2138	MOL002138	p-Cymen-8-ol	Alpha-2B adrenergic receptor	214	629		0.90565	0.704
Radix Bupleuri	2138	MOL002138	p-Cymen-8-ol	Alpha-1B adrenergic receptor	216	632		0.87857	0.712
Radix Bupleuri	2138	MOL002138	p-Cymen-8-ol	Sodium-dependent dopamine transporter	239	713		0.85785	0.738
Radix Bupleuri	2138	MOL002138	p-Cymen-8-ol	Beta-2 adrenergic receptor	261	766		0.80778	0.754
Radix Bupleuri	2187	MOL002187	Amylbenzene	Sodium-dependent noradrenaline transporter	186	540		0.83882	0.72
Radix Bupleuri	2201	MOL002201	cis-ligustilide	Prostaglandin G/H synthase 2	94	290		0.82494	0.808
Radix Bupleuri	2201	MOL002201	cis-ligustilide	Gamma-aminobutyric acid receptor subunit alpha-1	309	872		0.86631	0.744
Radix Bupleuri	23	MOL000023	Hemo-sol	Prostaglandin G/H synthase 2	94	290		0.855504	0.702
Radix Bupleuri	23	MOL000023	Hemo-sol	Gamma-aminobutyric acid receptor subunit alpha-1	309	872		0.958822	0.702
Radix Bupleuri	23	MOL000023	Hemo-sol	Alcohol dehydrogenase 1B	726	444		0.822685	0.712
Radix Bupleuri	23	MOL000023	Hemo-sol	Alcohol dehydrogenase 1C	727	517		0.827646	0.748
Radix Bupleuri	23	MOL000023	Hemo-sol	Cytochrome P450-cam	1143	2298		0.883042	0.716
Radix Bupleuri	23	MOL000023	Hemo-sol	Nuclear receptor coactivator 2	3276	6241		0.916935	0.746
Radix Bupleuri	23	MOL000023	Hemo-sol	Nuclear receptor coactivator 1	3279	6228		0.935823	0.724
Radix Bupleuri	23	MOL000023	Hemo-sol	Muscarinic acetylcholine receptor M2	210	617		0.810245	0.716
Radix Bupleuri	23	MOL000023	Hemo-sol	Gamma-aminobutyric-acid receptor alpha-2 subunit	141	423		0.977326	0.7
Radix Bupleuri	23	MOL000023	Hemo-sol	Muscarinic acetylcholine receptor M1	38	103		0.888524	0.704
Radix Bupleuri	23	MOL000023	Hemo-sol	Gamma-aminobutyric-acid receptor alpha-5 subunit	181	523		0.938253	0.734
Radix Bupleuri	23	MOL000023	Hemo-sol	Gamma-aminobutyric-acid receptor alpha-3 subunit	200	580		0.895451	0.72
Radix Bupleuri	23	MOL000023	Hemo-sol	Ig gamma-1 chain C region	1201	4785		0.927388	0.716
Radix Bupleuri	23	MOL000023	Hemo-sol	Gamma-aminobutyric-acid receptor subunit alpha-6	3284	841		0.906078	0.724
Radix Bupleuri	233	MOL000233	delta-Terpineol	Muscarinic acetylcholine receptor M3	16	51		0.88925	0.706
Radix Bupleuri	233	MOL000233	delta-Terpineol	Muscarinic acetylcholine receptor M1	38	103		0.91863	0.716
Radix Bupleuri	233	MOL000233	delta-Terpineol	Gamma-aminobutyric-acid receptor alpha-2 subunit	141	423		0.94936	0.71
Radix Bupleuri	233	MOL000233	delta-Terpineol	Gamma-aminobutyric-acid receptor alpha-3 subunit	200	580		0.89151	0.706
Radix Bupleuri	233	MOL000233	delta-Terpineol	Muscarinic acetylcholine receptor M2	210	617		0.93942	0.72
Radix Bupleuri	233	MOL000233	delta-Terpineol	Gamma-aminobutyric acid receptor subunit alpha-1	309	872		0.88171	0.764
Radix Bupleuri	233	MOL000233	delta-Terpineol	Gamma-aminobutyric-acid receptor alpha-5 subunit	181	523		0.93824	0.706
Radix Bupleuri	233	MOL000233	delta-Terpineol	Sodium-dependent noradrenaline transporter	186	540		0.89416	0.704
Radix Bupleuri	233	MOL000233	delta-Terpineol	Alpha-1B adrenergic receptor	216	632		0.84517	0.722
Radix Bupleuri	233	MOL000233	delta-Terpineol	Neuronal acetylcholine receptor subunit alpha-2	284	813		0.80847	0.7
Radix Bupleuri	233	MOL000233	delta-Terpineol	Gamma-aminobutyric-acid receptor subunit alpha-6	3284	841		0.90092	0.714
Radix Bupleuri	2335	MOL002335	beta-Gurjunene	Muscarinic acetylcholine receptor M3	16	51		0.96916	0.72
Radix Bupleuri	2335	MOL002335	beta-Gurjunene	Muscarinic acetylcholine receptor M1	38	103		0.95666	0.706
Radix Bupleuri	2335	MOL002335	beta-Gurjunene	Muscarinic acetylcholine receptor M2	210	617		0.95054	0.73
Radix Bupleuri	2335	MOL002335	beta-Gurjunene	Alpha-1B adrenergic receptor	216	632		0.91725	0.7
Radix Bupleuri	2335	MOL002335	beta-Gurjunene	Gamma-aminobutyric acid receptor subunit alpha-1	309	872		0.97658	0.7
Radix Bupleuri	2335	MOL002335	beta-Gurjunene	Neuronal acetylcholine receptor subunit alpha-2	284	813		0.931931	0.706
Radix Bupleuri	234	MOL000234	L-Limonen	Prostaglandin G/H synthase 2	94	290		0.84555	0.706
Radix Bupleuri	234	MOL000234	L-Limonen	Gamma-aminobutyric acid receptor subunit alpha-1	309	872		0.9604	0.702
Radix Bupleuri	234	MOL000234	L-Limonen	Alcohol dehydrogenase 1C	727	517		0.81202	0.736
Radix Bupleuri	234	MOL000234	L-Limonen	Cytochrome P450-cam	1143	2298		0.87099	0.706
Radix Bupleuri	234	MOL000234	L-Limonen	Alcohol dehydrogenase 1B	726	444		0.8081	0.7
Radix Bupleuri	234	MOL000234	L-Limonen	DNA topoisomerase II	287	817		0.904243	0.71
Radix Bupleuri	2365	MOL002365	(s)-carvone	Gamma-aminobutyric-acid receptor alpha-2 subunit	141	423		0.901684	0.714
Radix Bupleuri	2365	MOL002365	(s)-carvone	Gamma-aminobutyric acid receptor subunit alpha-1	309	872		0.815968	0.746
Radix Bupleuri	2365	MOL002365	(s)-carvone	Cytochrome P450-cam	1143	2298		0.80542	0.704
Radix Bupleuri	2365	MOL002365	(s)-carvone	Glutathione S-transferase P	733	904	validated	null	null
Radix Bupleuri	2365	MOL002365	(s)-carvone	Glutathione reductase, mitochondrial	240	714	validated	null	null
Radix Bupleuri	2375	MOL002375	(-)-isomenthone	Gamma-aminobutyric-acid receptor alpha-2 subunit	141	423		0.98014	0.708
Radix Bupleuri	2375	MOL002375	(-)-isomenthone	Muscarinic acetylcholine receptor M2	210	617		0.94915	0.716
Radix Bupleuri	2375	MOL002375	(-)-isomenthone	Gamma-aminobutyric acid receptor subunit alpha-1	309	872		0.9513	0.732
Radix Bupleuri	2375	MOL002375	(-)-isomenthone	Cytochrome P450-cam	1143	2298		0.9195	0.71
Radix Bupleuri	2375	MOL002375	(-)-isomenthone	Muscarinic acetylcholine receptor M3	16	51		0.949077	0.7
Radix Bupleuri	2375	MOL002375	(-)-isomenthone	Muscarinic acetylcholine receptor M1	38	103		0.955717	0.706
Radix Bupleuri	2375	MOL002375	(-)-isomenthone	Cholinesterase	559	3923		0.938768	0.706
Radix Bupleuri	2375	MOL002375	(-)-isomenthone	Ig gamma-1 chain C region	1201	4785		0.950742	0.704
Radix Bupleuri	2379	MOL002379	PTL	mRNA of PKA Catalytic Subunit C-alpha	699	6263		0.88013	0.76
Radix Bupleuri	244	MOL000244	()-Borneol	Cytochrome P450-cam	1143	2298		0.925979	0.802
Radix Bupleuri	244	MOL000244	()-Borneol	Gamma-aminobutyric-acid receptor alpha-2 subunit	141	423		0.9404	0.744
Radix Bupleuri	244	MOL000244	()-Borneol	Gamma-aminobutyric-acid receptor alpha-5 subunit	181	523		0.917705	0.726
Radix Bupleuri	244	MOL000244	()-Borneol	Gamma-aminobutyric-acid receptor alpha-3 subunit	200	580		0.840916	0.736
Radix Bupleuri	244	MOL000244	()-Borneol	Muscarinic acetylcholine receptor M2	210	617		0.837058	0.712
Radix Bupleuri	244	MOL000244	()-Borneol	Gamma-aminobutyric acid receptor subunit alpha-1	309	872		0.88817	0.77
Radix Bupleuri	244	MOL000244	()-Borneol	Ig gamma-1 chain C region	1201	4785		0.910318	0.718
Radix Bupleuri	244	MOL000244	()-Borneol	Gamma-aminobutyric-acid receptor subunit alpha-6	3284	841		0.869904	0.73
Radix Bupleuri	244	MOL000244	()-Borneol	Prostaglandin G/H synthase 1	6	20		0.906742	0.73
Radix Bupleuri	244	MOL000244	()-Borneol	Prostaglandin G/H synthase 2	94	290		0.952368	0.774
Radix Bupleuri	244	MOL000244	()-Borneol	Sodium-dependent noradrenaline transporter	186	540		0.933447	0.728
Radix Bupleuri	244	MOL000244	()-Borneol	Amine oxidase [flavin-containing] B	565	3939		0.915914	0.722
Radix Bupleuri	244	MOL000244	()-Borneol	Nuclear receptor coactivator 2	3276	6241		0.899921	0.748
Radix Bupleuri	247	MOL000247	(Z,Z)-farnesol	Prostaglandin G/H synthase 1	6	20		0.916948	0.702
Radix Bupleuri	247	MOL000247	(Z,Z)-farnesol	Prostaglandin G/H synthase 2	94	290		0.939121	0.74
Radix Bupleuri	247	MOL000247	(Z,Z)-farnesol	Retinoic acid receptor RXR-alpha	158	459		0.946865	0.722
Radix Bupleuri	247	MOL000247	(Z,Z)-farnesol	Sodium-dependent noradrenaline transporter	186	540		0.947917	0.718
Radix Bupleuri	247	MOL000247	(Z,Z)-farnesol	Amine oxidase [flavin-containing] B	565	3939		0.907868	0.748
Radix Bupleuri	254	MOL000254	eugenol	Prostaglandin G/H synthase 1	6	20		0.88164	0.742
Radix Bupleuri	254	MOL000254	eugenol	Dopamine D1 receptor	7	23		0.88777	0.702
Radix Bupleuri	254	MOL000254	eugenol	Muscarinic acetylcholine receptor M3	16	51		0.81993	0.734
Radix Bupleuri	254	MOL000254	eugenol	Muscarinic acetylcholine receptor M1	38	103		0.89486	0.742
Radix Bupleuri	254	MOL000254	eugenol	Beta-1 adrenergic receptor	63	193		0.88839	0.732
Radix Bupleuri	254	MOL000254	eugenol	Prostaglandin G/H synthase 2	94	290	validated	0.88906	0.814
Radix Bupleuri	254	MOL000254	eugenol	Nitric-oxide synthase, endothelial	95	291		0.8721	0.778
Radix Bupleuri	254	MOL000254	eugenol	Alpha-2A adrenergic receptor	105	318		0.93333	0.718
Radix Bupleuri	254	MOL000254	eugenol	Alpha-2C adrenergic receptor	126	378		0.89577	0.752
Radix Bupleuri	254	MOL000254	eugenol	Sodium-dependent noradrenaline transporter	186	540		0.9238	0.724
Radix Bupleuri	254	MOL000254	eugenol	Alpha-1A adrenergic receptor	191	556		0.9112	0.758
Radix Bupleuri	254	MOL000254	eugenol	Muscarinic acetylcholine receptor M2	210	617		0.91788	0.702
Radix Bupleuri	254	MOL000254	eugenol	Alpha-1B adrenergic receptor	216	632		0.89322	0.72
Radix Bupleuri	254	MOL000254	eugenol	Sodium-dependent dopamine transporter	239	713		0.9202	0.716
Radix Bupleuri	254	MOL000254	eugenol	Beta-2 adrenergic receptor	261	766		0.89236	0.742
Radix Bupleuri	254	MOL000254	eugenol	Beta-lactamase	499	2478		0.88874	0.754
Radix Bupleuri	254	MOL000254	eugenol	Amine oxidase [flavin-containing] B	565	3939	validated	0.92449	0.768
Radix Bupleuri	254	MOL000254	eugenol	Amine oxidase [flavin-containing] A	566	3941	validated	0.94341	0.724
Radix Bupleuri	254	MOL000254	eugenol	Lysozyme	1172	2300		0.84481	0.704
Radix Bupleuri	254	MOL000254	eugenol	Chymotrypsinogen B	1696	6011		0.86514	0.704
Radix Bupleuri	254	MOL000254	eugenol	Alpha-1D adrenergic receptor	272	789		0.86729	0.702
Radix Bupleuri	254	MOL000254	eugenol	Leukotriene A-4 hydrolase	521	3060		0.85522	0.702
Radix Bupleuri	254	MOL000254	eugenol	Alpha-2B adrenergic receptor	214	629		0.9264	0.704
Radix Bupleuri	254	MOL000254	eugenol	Urokinase-type plasminogen activator	346	1074		0.892898	0.71
Radix Bupleuri	254	MOL000254	eugenol	Thermolysin	1179	6285		0.856813	0.706
Radix Bupleuri	254	MOL000254	eugenol	Sodium channel protein type 5 subunit alpha	70	220		0.800654	0.708
Radix Bupleuri	254	MOL000254	eugenol	Transcription factor p65	4565	h001	validated	null	null
Radix Bupleuri	254	MOL000254	eugenol	Cytochrome P450 1A1	4149	h001	validated	null	null
Radix Bupleuri	254	MOL000254	eugenol	Cytochrome P450 1B1	4150	h001	validated	null	null
Radix Bupleuri	254	MOL000254	eugenol	Arachidonate 5-lipoxygenase	88	275	validated	null	null
Radix Bupleuri	254	MOL000254	eugenol	Aryl hydrocarbon receptor	3204	6220	validated	null	null
Radix Bupleuri	254	MOL000254	eugenol	Canalicular multispecific organic anion transporter 1	4079	h001	validated	null	null
Radix Bupleuri	254	MOL000254	eugenol	T-lymphocyte activation antigen CD86	325	942	validated	null	null
Radix Bupleuri	254	MOL000254	eugenol	Serine/threonine-protein phosphatase 2B catalytic subunit alpha isoform	3971	6746	validated	null	null
Radix Bupleuri	254	MOL000254	eugenol	Pepsin A	2877	6231	validated	null	null
Radix Bupleuri	254	MOL000254	eugenol	Mucin-1	4368	h001	validated	null	null
Radix Bupleuri	254	MOL000254	eugenol	Quinone oxidoreductase	3779	2159	validated	null	null
Radix Bupleuri	254	MOL000254	eugenol	Calcium-transporting ATPase type 2C member 1	3610	241	validated	null	null
Radix Bupleuri	254	MOL000254	eugenol	Short transient receptor potential channel 3	4523	h001	validated	null	null
Radix Bupleuri	254	MOL000254	eugenol	Transient receptor potential cation channel subfamily V member 3	651	5838	validated	null	null
Radix Bupleuri	254	MOL000254	eugenol	Ecto-NOX disulfide-thiol exchanger 2	4182	h001	validated	null	null
Radix Bupleuri	2579	MOL002579	capsaicin	Transcription factor p65	4565	h001	validated	null	null
Radix Bupleuri	2579	MOL002579	capsaicin	RAC-alpha serine/threonine-protein kinase	4490	h001	validated	null	null
Radix Bupleuri	2579	MOL002579	capsaicin	Vascular endothelial growth factor A	740	183	validated	null	null
Radix Bupleuri	2579	MOL002579	capsaicin	Apoptosis regulator Bcl-2	86	273	validated	null	null
Radix Bupleuri	2579	MOL002579	capsaicin	Proto-oncogene c-Fos	4478	h001	validated	null	null
Radix Bupleuri	2579	MOL002579	capsaicin	Mitogen-activated protein kinase 1	354	1176	validated	null	null
Radix Bupleuri	2579	MOL002579	capsaicin	Caspase-3	4087	h001	validated	null	null
Radix Bupleuri	2579	MOL002579	capsaicin	Prostaglandin G/H synthase 2	94	290	validated	null	null
Radix Bupleuri	2579	MOL002579	capsaicin	NF-kappa-B inhibitor alpha	4394	h001	validated	null	null
Radix Bupleuri	2579	MOL002579	capsaicin	Interstitial collagenase	353	1167	validated	null	null
Radix Bupleuri	2579	MOL002579	capsaicin	Transcription factor jun-B	4562	h001	validated	null	null
Radix Bupleuri	2579	MOL002579	capsaicin	Heme oxygenase 1	2132	3391	validated	null	null
Radix Bupleuri	2579	MOL002579	capsaicin	Cyclic AMP-responsive element-binding protein 1	4140	h001	validated	null	null
Radix Bupleuri	2579	MOL002579	capsaicin	Neuromodulin	4385	h001	validated	null	null
Radix Bupleuri	2579	MOL002579	capsaicin	Multidrug resistance protein 1	408	1588	validated	null	null
Radix Bupleuri	2579	MOL002579	capsaicin	Arachidonate 5-lipoxygenase	88	275	validated	null	null
Radix Bupleuri	2579	MOL002579	capsaicin	Nuclear factor erythroid 2-related factor 2	4398	h001	validated	null	null
Radix Bupleuri	2579	MOL002579	capsaicin	Glial fibrillary acidic protein	4226	h001	validated	null	null
Radix Bupleuri	2579	MOL002579	capsaicin	Proteinase-activated receptor 2	4463	h001	validated	null	null
Radix Bupleuri	2579	MOL002579	capsaicin	Erythroid transcription factor	4192	h001	validated	null	null
Radix Bupleuri	2579	MOL002579	capsaicin	Glutamine synthetase	3925	3987	validated	null	null
Radix Bupleuri	2579	MOL002579	capsaicin	Protransforming growth factor alpha	4481	h001	validated	null	null
Radix Bupleuri	2579	MOL002579	capsaicin	Prostate-specific antigen	4458	h001	validated	null	null
Radix Bupleuri	2579	MOL002579	capsaicin	Chymotrypsin-C	4122	h001	validated	null	null
Radix Bupleuri	2579	MOL002579	capsaicin	3 beta-hydroxysteroid dehydrogenase/Delta 5-->4-isomerase type 2	3996	h001	validated	null	null
Radix Bupleuri	2579	MOL002579	capsaicin	Transient receptor potential cation channel subfamily V member 1	404	1558	validated	null	null
Radix Bupleuri	2579	MOL002579	capsaicin	Ras-related C3 botulinum toxin substrate 1	3828	1882	validated	null	null
Radix Bupleuri	2579	MOL002579	capsaicin	Pro-opiomelanocortin	4454	h001	validated	null	null
Radix Bupleuri	2579	MOL002579	capsaicin	Mitochondrial brown fat uncoupling protein 1	4354	h001	validated	null	null
Radix Bupleuri	2579	MOL002579	capsaicin	Voltage-dependent T-type calcium channel subunit alpha-1H	336	964	validated	null	null
Radix Bupleuri	2579	MOL002579	capsaicin	Phosphoglycolate phosphatase	4427	h001	validated	null	null
Radix Bupleuri	2579	MOL002579	capsaicin	Hemoglobin subunit beta	4249	h001	validated	null	null
Radix Bupleuri	2579	MOL002579	capsaicin	Glycophorin-A	4233	h001	validated	null	null
Radix Bupleuri	2579	MOL002579	capsaicin	Transcription factor PU.1	4566	h001	validated	null	null
Radix Bupleuri	2579	MOL002579	capsaicin	Protachykinin-1	4459	h001	validated	null	null
Radix Bupleuri	2579	MOL002579	capsaicin	Substance-P receptor	142	427	validated	null	null
Radix Bupleuri	259	MOL000259	o-Thymol	Muscarinic acetylcholine receptor M1	38	103		0.879992	0.716
Radix Bupleuri	259	MOL000259	o-Thymol	Beta-1 adrenergic receptor	63	193		0.830148	0.718
Radix Bupleuri	259	MOL000259	o-Thymol	Alpha-2C adrenergic receptor	126	378		0.84224	0.728
Radix Bupleuri	259	MOL000259	o-Thymol	Sodium-dependent noradrenaline transporter	186	540		0.875903	0.712
Radix Bupleuri	259	MOL000259	o-Thymol	Alpha-1A adrenergic receptor	191	556		0.847433	0.72
Radix Bupleuri	259	MOL000259	o-Thymol	Sodium-dependent dopamine transporter	239	713		0.859269	0.706
Radix Bupleuri	259	MOL000259	o-Thymol	Beta-2 adrenergic receptor	261	766		0.813996	0.728
Radix Bupleuri	259	MOL000259	o-Thymol	Muscarinic acetylcholine receptor M2	210	617		0.87144	0.706
Radix Bupleuri	259	MOL000259	o-Thymol	Alpha-1B adrenergic receptor	216	632		0.85915	0.706
Radix Bupleuri	259	MOL000259	o-Thymol	Alpha-1D adrenergic receptor	272	789		0.801865	0.702
Radix Bupleuri	27	MOL000027	alpha-Curcumene	Muscarinic acetylcholine receptor M1	38	103		0.83473	0.704
Radix Bupleuri	27	MOL000027	alpha-Curcumene	Prostaglandin G/H synthase 2	94	290		0.83134	0.76
Radix Bupleuri	27	MOL000027	alpha-Curcumene	Sodium-dependent noradrenaline transporter	186	540		0.86679	0.746
Radix Bupleuri	27	MOL000027	alpha-Curcumene	Alpha-1A adrenergic receptor	191	556		0.8097	0.718
Radix Bupleuri	27	MOL000027	alpha-Curcumene	Amine oxidase [flavin-containing] B	565	3939		0.83129	0.732
Radix Bupleuri	27	MOL000027	alpha-Curcumene	Sodium-dependent dopamine transporter	239	713		0.867659	0.704
Radix Bupleuri	270	MOL000270	CHEBI:7	Cytochrome P450-cam	1143	2298		0.884219	0.764
Radix Bupleuri	270	MOL000270	CHEBI:7	Muscarinic acetylcholine receptor M3	16	51		0.853735	0.762
Radix Bupleuri	270	MOL000270	CHEBI:7	Muscarinic acetylcholine receptor M1	38	103		0.887887	0.77
Radix Bupleuri	270	MOL000270	CHEBI:7	Muscarinic acetylcholine receptor M4	154	450		0.822584	0.702
Radix Bupleuri	270	MOL000270	CHEBI:7	CGMP-inhibited 3',5'-cyclic phosphodiesterase A	172	485		0.834024	0.716
Radix Bupleuri	270	MOL000270	CHEBI:7	5-hydroxytryptamine 2A receptor	175	502		0.812754	0.72
Radix Bupleuri	270	MOL000270	CHEBI:7	Muscarinic acetylcholine receptor M2	210	617		0.876736	0.716
Radix Bupleuri	270	MOL000270	CHEBI:7	Alpha-1B adrenergic receptor	216	632		0.803634	0.744
Radix Bupleuri	270	MOL000270	CHEBI:7	Beta-2 adrenergic receptor	261	766		0.847462	0.736
Radix Bupleuri	270	MOL000270	CHEBI:7	Sodium-dependent serotonin transporter	290	824		0.817305	0.722
Radix Bupleuri	270	MOL000270	CHEBI:7	Gamma-aminobutyric acid receptor subunit alpha-1	309	872		0.817928	0.75
Radix Bupleuri	270	MOL000270	CHEBI:7	Coagulation factor Xa	79	239		0.939673	0.716
Radix Bupleuri	270	MOL000270	CHEBI:7	Prostaglandin G/H synthase 2	94	290		0.937572	0.722
Radix Bupleuri	270	MOL000270	CHEBI:7	DNA topoisomerase II	287	817		0.9386	0.73
Radix Bupleuri	270	MOL000270	CHEBI:7	Nuclear receptor coactivator 2	3276	6241		0.833156	0.734
Radix Bupleuri	270	MOL000270	CHEBI:7	Calmodulin	3907	465		0.810579	0.734
Radix Bupleuri	271	MOL000271	l-carvone	Gamma-aminobutyric-acid receptor alpha-2 subunit	141	423		0.91538	0.712
Radix Bupleuri	271	MOL000271	l-carvone	Gamma-aminobutyric acid receptor subunit alpha-1	309	872		0.83319	0.736
Radix Bupleuri	271	MOL000271	l-carvone	Cytochrome P450-cam	1143	2298		0.816	0.71
Radix Bupleuri	271	MOL000271	l-carvone	Muscarinic acetylcholine receptor M3	16	51		0.968921	0.706
Radix Bupleuri	271	MOL000271	l-carvone	Prostaglandin G/H synthase 2	94	290		0.919893	0.716
Radix Bupleuri	271	MOL000271	l-carvone	Progonadoliberin-1	4446	h001	validated	null	null
Radix Bupleuri	2776	MOL002776	Baicalin	Coagulation factor Xa	79	239		0.83996	0.722
Radix Bupleuri	2776	MOL002776	Baicalin	mRNA of Protein-tyrosine phosphatase, non-receptor type 1	229	687		0.95372	0.716
Radix Bupleuri	2786	MOL002786	Apocynin	Muscarinic acetylcholine receptor M1	38	103		0.82769	0.722
Radix Bupleuri	2786	MOL002786	Apocynin	Prostaglandin G/H synthase 2	94	290		0.80306	0.844
Radix Bupleuri	2786	MOL002786	Apocynin	Alpha-2A adrenergic receptor	105	318		0.88799	0.706
Radix Bupleuri	2786	MOL002786	Apocynin	Alpha-2C adrenergic receptor	126	378		0.82594	0.754
Radix Bupleuri	2786	MOL002786	Apocynin	Muscarinic acetylcholine receptor M2	210	617		0.81551	0.702
Radix Bupleuri	2786	MOL002786	Apocynin	Alpha-2B adrenergic receptor	214	629		0.85628	0.704
Radix Bupleuri	2786	MOL002786	Apocynin	Alpha-1B adrenergic receptor	216	632		0.80474	0.702
Radix Bupleuri	2786	MOL002786	Apocynin	Amine oxidase [flavin-containing] A	566	3941		0.8586	0.728
Radix Bupleuri	2830	MOL002830	PCR	Alcohol dehydrogenase 1B	726	444		0.8836	0.73
Radix Bupleuri	2830	MOL002830	PCR	Alcohol dehydrogenase 1C	727	517		0.9087	0.778
Radix Bupleuri	2830	MOL002830	PCR	Alcohol dehydrogenase 1A	729	251		0.9013	0.714
Radix Bupleuri	2830	MOL002830	PCR	Nicotinate-nucleotide--dimethylbenzimidazole phosphoribosyltransferase	2262	2264		0.88098	0.784
Radix Bupleuri	2885	MOL002885	WLN: QV4	Alcohol dehydrogenase 1B	726	444		0.81231	0.778
Radix Bupleuri	2885	MOL002885	WLN: QV4	Alcohol dehydrogenase 1C	727	517		0.87249	0.802
Radix Bupleuri	2885	MOL002885	WLN: QV4	Cytochrome P450-cam	1143	2298		0.82391	0.734
Radix Bupleuri	2885	MOL002885	WLN: QV4	Ferrichrome-iron receptor	1306	2427		0.82802	0.72
Radix Bupleuri	2885	MOL002885	WLN: QV4	2-hydroxy-6-oxo-7-methylocta-2,4-dienoate hydrolase	2230	4674		0.90507	0.726
Radix Bupleuri	2885	MOL002885	WLN: QV4	Glycine amidinotransferase, mitochondrial	3553	383		0.86672	0.738
Radix Bupleuri	2885	MOL002885	WLN: QV4	Trypsin-3	3952	2886		0.84747	0.766
Radix Bupleuri	29	MOL000029	beta-Humulene	Prostaglandin G/H synthase 2	94	290		0.94857	0.718
Radix Bupleuri	29	MOL000029	beta-Humulene	Gamma-aminobutyric-acid receptor alpha-2 subunit	141	423		0.97388	0.708
Radix Bupleuri	29	MOL000029	beta-Humulene	Sodium-dependent noradrenaline transporter	186	540		0.94731	0.718
Radix Bupleuri	29	MOL000029	beta-Humulene	Gamma-aminobutyric acid receptor subunit alpha-1	309	872		0.97918	0.716
Radix Bupleuri	29	MOL000029	beta-Humulene	Nuclear receptor coactivator 2	3276	6241		0.86428	0.704
Radix Bupleuri	2936	MOL002936	5,8-Dihydroxy-6,7-dimethoxyflavone	Nitric oxide synthase, inducible	3	7		0.912602	0.742
Radix Bupleuri	2936	MOL002936	5,8-Dihydroxy-6,7-dimethoxyflavone	Prostaglandin G/H synthase 1	6	20		0.892106	0.738
Radix Bupleuri	2936	MOL002936	5,8-Dihydroxy-6,7-dimethoxyflavone	Estrogen receptor	46	136		0.965526	0.816
Radix Bupleuri	2936	MOL002936	5,8-Dihydroxy-6,7-dimethoxyflavone	Androgen receptor	48	146		0.94	0.772
Radix Bupleuri	2936	MOL002936	5,8-Dihydroxy-6,7-dimethoxyflavone	Sodium channel protein type 5 subunit alpha	70	220		0.898167	0.732
Radix Bupleuri	2936	MOL002936	5,8-Dihydroxy-6,7-dimethoxyflavone	Peroxisome proliferator activated receptor gamma	78	238		0.946986	0.734
Radix Bupleuri	2936	MOL002936	5,8-Dihydroxy-6,7-dimethoxyflavone	Prostaglandin G/H synthase 2	94	290		0.926672	0.814
Radix Bupleuri	2936	MOL002936	5,8-Dihydroxy-6,7-dimethoxyflavone	Coagulation factor VII	123	369		0.84529	0.7
Radix Bupleuri	2936	MOL002936	5,8-Dihydroxy-6,7-dimethoxyflavone	Estrogen receptor beta	307	869		0.938352	0.75
Radix Bupleuri	2936	MOL002936	5,8-Dihydroxy-6,7-dimethoxyflavone	Dipeptidyl peptidase IV	332	952		0.924209	0.738
Radix Bupleuri	2936	MOL002936	5,8-Dihydroxy-6,7-dimethoxyflavone	Peroxisome proliferator activated receptor delta	396	1502		0.861802	0.708
Radix Bupleuri	2936	MOL002936	5,8-Dihydroxy-6,7-dimethoxyflavone	Mitogen-activated protein kinase 14	402	1540		0.933247	0.75
Radix Bupleuri	2936	MOL002936	5,8-Dihydroxy-6,7-dimethoxyflavone	Glycogen synthase kinase-3 beta	422	1721		0.944596	0.738
Radix Bupleuri	2936	MOL002936	5,8-Dihydroxy-6,7-dimethoxyflavone	Heat shock protein HSP 90	444	1939		0.970494	0.718
Radix Bupleuri	2936	MOL002936	5,8-Dihydroxy-6,7-dimethoxyflavone	Cell division protein kinase 2	482	2240		0.965128	0.74
Radix Bupleuri	2936	MOL002936	5,8-Dihydroxy-6,7-dimethoxyflavone	Serine/threonine-protein kinase Chk1	647	5790		0.940258	0.712
Radix Bupleuri	2936	MOL002936	5,8-Dihydroxy-6,7-dimethoxyflavone	mRNA of PKA Catalytic Subunit C-alpha	699	6263		0.92165	0.7
Radix Bupleuri	2936	MOL002936	5,8-Dihydroxy-6,7-dimethoxyflavone	Trypsin-1	2928	3176		0.917152	0.764
Radix Bupleuri	2936	MOL002936	5,8-Dihydroxy-6,7-dimethoxyflavone	Nuclear receptor coactivator 2	3276	6241		0.802485	0.812
Radix Bupleuri	2936	MOL002936	5,8-Dihydroxy-6,7-dimethoxyflavone	Nuclear receptor coactivator 1	3279	6228		0.86013	0.714
Radix Bupleuri	2936	MOL002936	5,8-Dihydroxy-6,7-dimethoxyflavone	Calmodulin	3907	465		0.854688	0.754
Radix Bupleuri	2972	MOL002972	(4S)-1-methyl-4-(6-methylhepta-1,5-dien-2-yl)cyclohexene	Prostaglandin G/H synthase 2	94	290		0.96605	0.724
Radix Bupleuri	2972	MOL002972	(4S)-1-methyl-4-(6-methylhepta-1,5-dien-2-yl)cyclohexene	Sodium-dependent noradrenaline transporter	186	540		0.94569	0.716
Radix Bupleuri	2972	MOL002972	(4S)-1-methyl-4-(6-methylhepta-1,5-dien-2-yl)cyclohexene	Amine oxidase [flavin-containing] B	565	3939		0.92609	0.728
Radix Bupleuri	2972	MOL002972	(4S)-1-methyl-4-(6-methylhepta-1,5-dien-2-yl)cyclohexene	Nuclear receptor coactivator 2	3276	6241		0.91899	0.714
Radix Bupleuri	2972	MOL002972	(4S)-1-methyl-4-(6-methylhepta-1,5-dien-2-yl)cyclohexene	Muscarinic acetylcholine receptor M2	210	617		0.82983	0.7
Radix Bupleuri	2983	MOL002983	Guasol	Alcohol dehydrogenase 1C	727	517		0.91201	0.752
Radix Bupleuri	2983	MOL002983	Guasol	Lysozyme	1172	2300		0.91154	0.806
Radix Bupleuri	2983	MOL002983	Guasol	Bacillolysin	1961	2457		0.81868	0.728
Radix Bupleuri	2983	MOL002983	Guasol	Nicotinate-nucleotide--dimethylbenzimidazole phosphoribosyltransferase	2262	2264		0.88701	0.78
Radix Bupleuri	302	MOL000302	Undekansaeure	Phospholipase A2	708	6500		0.91157	0.702
Radix Bupleuri	302	MOL000302	Undekansaeure	Alcohol dehydrogenase 1C	727	517		0.94296	0.702
Radix Bupleuri	302	MOL000302	Undekansaeure	3-oxoacyl-[acyl-carrier-protein] synthase 1	1491	889		0.95617	0.704
Radix Bupleuri	303	MOL000303	caprylic acid	Phospholipase A2	708	6500		0.876159	0.716
Radix Bupleuri	303	MOL000303	caprylic acid	Alcohol dehydrogenase 1B	726	444		0.925978	0.742
Radix Bupleuri	303	MOL000303	caprylic acid	Alcohol dehydrogenase 1C	727	517		0.94383	0.724
Radix Bupleuri	303	MOL000303	caprylic acid	Acyl-CoA thioesterase I precursor	1535	3686		0.856154	0.702
Radix Bupleuri	303	MOL000303	caprylic acid	Trypsin-3	3952	2886		0.945774	0.718
Radix Bupleuri	303	MOL000303	caprylic acid	Interleukin-8	4303	h001	validated	null	null
Radix Bupleuri	303	MOL000303	caprylic acid	Peroxisome proliferator-activated receptor alpha	4420	h001	validated	null	null
Radix Bupleuri	303	MOL000303	caprylic acid	Histone acetyltransferase p300	4255	h001	validated	null	null
Radix Bupleuri	303	MOL000303	caprylic acid	Fatty acid-binding protein, liver	4201	h001	validated	null	null
Radix Bupleuri	303	MOL000303	caprylic acid	Retinol-binding protein 2	4499	h001	validated	null	null
Radix Bupleuri	3040	MOL003040	Amylol	mRNA of PKA Catalytic Subunit C-alpha	699	6263		0.82907	0.726
Radix Bupleuri	3040	MOL003040	Amylol	Alcohol dehydrogenase 1C	727	517		0.85899	0.78
Radix Bupleuri	3040	MOL003040	Amylol	Haloalkane dehalogenase	2020	2281		0.83661	0.718
Radix Bupleuri	3040	MOL003040	Amylol	Trypsin-3	3952	2886		0.8536	0.768
Radix Bupleuri	305	MOL000305	lauric acid	Prostaglandin G/H synthase 1	6	20		0.82742	0.706
Radix Bupleuri	305	MOL000305	lauric acid	Cholinesterase	559	3923		0.83359	0.704
Radix Bupleuri	305	MOL000305	lauric acid	Phospholipase A2	708	6500		0.91763	0.722
Radix Bupleuri	305	MOL000305	lauric acid	Alcohol dehydrogenase 1B	726	444		0.90692	0.7
Radix Bupleuri	305	MOL000305	lauric acid	Alcohol dehydrogenase 1C	727	517		0.93633	0.706
Radix Bupleuri	305	MOL000305	lauric acid	Ig gamma-1 chain C region	1201	4785		0.96438	0.716
Radix Bupleuri	305	MOL000305	lauric acid	Ferrichrome-iron receptor	1306	2427		0.93856	0.722
Radix Bupleuri	305	MOL000305	lauric acid	3-oxoacyl-[acyl-carrier-protein] synthase 1	1491	889		0.95661	0.744
Radix Bupleuri	305	MOL000305	lauric acid	Prostaglandin G/H synthase 2	94	290	validated	0.805368	0.732
Radix Bupleuri	305	MOL000305	lauric acid	Rhinovirus coat protein	709	6521		0.835423	0.7
Radix Bupleuri	305	MOL000305	lauric acid	Transcription factor p65	4565	h001	validated	null	null
Radix Bupleuri	305	MOL000305	lauric acid	RAC-alpha serine/threonine-protein kinase	4490	h001	validated	null	null
Radix Bupleuri	305	MOL000305	lauric acid	Interleukin-6	351	1159	validated	null	null
Radix Bupleuri	305	MOL000305	lauric acid	Interleukin-8	4303	h001	validated	null	null
Radix Bupleuri	305	MOL000305	lauric acid	Dual oxidase 2	4174	h001	validated	null	null
Radix Bupleuri	305	MOL000305	lauric acid	T-lymphocyte activation antigen CD80	326	944	validated	null	null
Radix Bupleuri	305	MOL000305	lauric acid	T-lymphocyte activation antigen CD86	325	942	validated	null	null
Radix Bupleuri	305	MOL000305	lauric acid	Tumor necrosis factor receptor superfamily member 5	4587	h001	validated	null	null
Radix Bupleuri	3050	MOL003050	nonanoic acid	Phospholipase A2	708	6500		0.889169	0.7
Radix Bupleuri	3050	MOL003050	nonanoic acid	Alcohol dehydrogenase 1B	726	444		0.918534	0.738
Radix Bupleuri	3050	MOL003050	nonanoic acid	Alcohol dehydrogenase 1C	727	517		0.941422	0.728
Radix Bupleuri	3050	MOL003050	nonanoic acid	Cathepsin D	363	1243		0.9298	0.704
Radix Bupleuri	3050	MOL003050	nonanoic acid	Inositol-3-phosphate synthase 1	4272	h001	validated	null	null
Radix Bupleuri	32	MOL000032	beta-Eudesmol	Gamma-aminobutyric acid receptor subunit alpha-1	309	872		0.83109	0.746
Radix Bupleuri	32	MOL000032	beta-Eudesmol	Neuronal acetylcholine receptor protein, alpha-7 chain	581	4095		0.80216	0.71
Radix Bupleuri	449	MOL000449	Stigmasterol	Progesterone receptor	209	614		0.91372	0.722
Radix Bupleuri	449	MOL000449	Stigmasterol	Mineralocorticoid receptor	252	737		0.93992	0.704
Radix Bupleuri	449	MOL000449	Stigmasterol	Nuclear receptor coactivator 2	3276	6241		0.80043	0.724
Radix Bupleuri	449	MOL000449	Stigmasterol	Alcohol dehydrogenase 1C	727	517		0.916712	0.718
Radix Bupleuri	449	MOL000449	Stigmasterol	Ig gamma-1 chain C region	1201	4785		0.865274	0.716
Radix Bupleuri	449	MOL000449	Stigmasterol	Retinoic acid receptor RXR-alpha	158	459		0.908315	0.702
Radix Bupleuri	449	MOL000449	Stigmasterol	Nuclear receptor coactivator 1	3279	6228		0.903861	0.738
Radix Bupleuri	449	MOL000449	Stigmasterol	Prostaglandin G/H synthase 1	6	20		0.926223	0.788
Radix Bupleuri	449	MOL000449	Stigmasterol	Prostaglandin G/H synthase 2	94	290		0.952074	0.844
Radix Bupleuri	449	MOL000449	Stigmasterol	Alpha-2A adrenergic receptor	105	318		0.80929	0.718
Radix Bupleuri	449	MOL000449	Stigmasterol	Sodium-dependent noradrenaline transporter	186	540		0.829138	0.708
Radix Bupleuri	449	MOL000449	Stigmasterol	Sodium-dependent dopamine transporter	239	713		0.836413	0.734
Radix Bupleuri	449	MOL000449	Stigmasterol	Beta-2 adrenergic receptor	261	766		0.849795	0.746
Radix Bupleuri	449	MOL000449	Stigmasterol	Aldose reductase	288	822		0.916136	0.712
Radix Bupleuri	449	MOL000449	Stigmasterol	Urokinase-type plasminogen activator	346	1074		0.885465	0.71
Radix Bupleuri	449	MOL000449	Stigmasterol	Leukotriene A-4 hydrolase	521	3060		0.916724	0.734
Radix Bupleuri	449	MOL000449	Stigmasterol	Amine oxidase [flavin-containing] B	565	3939		0.958232	0.77
Radix Bupleuri	449	MOL000449	Stigmasterol	Amine oxidase [flavin-containing] A	566	3941		0.96149	0.72
Radix Bupleuri	449	MOL000449	Stigmasterol	mRNA of PKA Catalytic Subunit C-alpha	699	6263		0.825255	0.722
Radix Bupleuri	449	MOL000449	Stigmasterol	Chymotrypsinogen B	1696	6011		0.825543	0.724
Radix Bupleuri	449	MOL000449	Stigmasterol	Muscarinic acetylcholine receptor M3	16	51		0.909264	0.752
Radix Bupleuri	449	MOL000449	Stigmasterol	Muscarinic acetylcholine receptor M1	38	103		0.917348	0.76
Radix Bupleuri	449	MOL000449	Stigmasterol	Beta-1 adrenergic receptor	63	193		0.833128	0.72
Radix Bupleuri	449	MOL000449	Stigmasterol	Sodium channel protein type 5 subunit alpha	70	220		0.827658	0.7
Radix Bupleuri	449	MOL000449	Stigmasterol	5-hydroxytryptamine 2A receptor	175	502		0.852976	0.712
Radix Bupleuri	449	MOL000449	Stigmasterol	Alpha-1A adrenergic receptor	191	556		0.838547	0.738
Radix Bupleuri	449	MOL000449	Stigmasterol	Gamma-aminobutyric-acid receptor alpha-3 subunit	200	580		0.804967	0.702
Radix Bupleuri	449	MOL000449	Stigmasterol	Muscarinic acetylcholine receptor M2	210	617		0.914792	0.728
Radix Bupleuri	449	MOL000449	Stigmasterol	Alpha-1B adrenergic receptor	216	632		0.87389	0.752
Radix Bupleuri	449	MOL000449	Stigmasterol	Gamma-aminobutyric acid receptor subunit alpha-1	309	872		0.87386	0.756
Radix Bupleuri	449	MOL000449	Stigmasterol	Neuronal acetylcholine receptor protein, alpha-7 chain	581	4095		0.811049	0.754
Radix Bupleuri	3493	MOL003493	naphthalene	Apoptosis regulator Bcl-2	86	273	validated	null	null
Radix Bupleuri	3493	MOL003493	naphthalene	Proto-oncogene c-Fos	4478	h001	validated	null	null
Radix Bupleuri	3493	MOL003493	naphthalene	Eukaryotic translation initiation factor 6	4197	h001	validated	null	null
Radix Bupleuri	3493	MOL003493	naphthalene	Transcription factor AP-1	414	1629	validated	null	null
Radix Bupleuri	3493	MOL003493	naphthalene	RAF proto-oncogene serine/threonine-protein kinase	4491	h001	validated	null	null
Radix Bupleuri	3493	MOL003493	naphthalene	Cytochrome P450 1A1	4149	h001	validated	null	null
Radix Bupleuri	3493	MOL003493	naphthalene	Interleukin-8	4303	h001	validated	null	null
Radix Bupleuri	3493	MOL003493	naphthalene	Myeloperoxidase	428	1757	validated	null	null
Radix Bupleuri	3493	MOL003493	naphthalene	Ubiquitin carboxyl-terminal hydrolase isozyme L1	4598	h001	validated	null	null
Radix Bupleuri	3493	MOL003493	naphthalene	Peroxiredoxin-5, mitochondrial	3771	1119	validated	null	null
Radix Bupleuri	3493	MOL003493	naphthalene	RNA-binding protein FUS	4504	h001	validated	null	null
Radix Bupleuri	3509	MOL003509	Nonanol	Alcohol dehydrogenase 1B	726	444		0.92494	0.73
Radix Bupleuri	3509	MOL003509	Nonanol	Alcohol dehydrogenase 1C	727	517		0.9444	0.724
Radix Bupleuri	7260	MOL007260	Isorhamnetin-3-mono-beta-D-glucoside	Coagulation factor Xa	79	239		0.8653	0.702
Radix Bupleuri	7260	MOL007260	Isorhamnetin-3-mono-beta-D-glucoside	DNA topoisomerase II	287	817		0.91922	0.708
Radix Bupleuri	7260	MOL007260	Isorhamnetin-3-mono-beta-D-glucoside	mRNA of Protein-tyrosine phosphatase, non-receptor type 1	229	687		0.951422	0.706
Radix Bupleuri	354	MOL000354	isorhamnetin	Nitric oxide synthase, inducible	3	7	validated	0.900919	0.714
Radix Bupleuri	354	MOL000354	isorhamnetin	Prostaglandin G/H synthase 1	6	20		0.894453	0.704
Radix Bupleuri	354	MOL000354	isorhamnetin	Estrogen receptor	46	136		0.96214	0.772
Radix Bupleuri	354	MOL000354	isorhamnetin	Androgen receptor	48	146		0.905513	0.768
Radix Bupleuri	354	MOL000354	isorhamnetin	Peroxisome proliferator activated receptor gamma	78	238		0.920647	0.71
Radix Bupleuri	354	MOL000354	isorhamnetin	Prostaglandin G/H synthase 2	94	290		0.938893	0.822
Radix Bupleuri	354	MOL000354	isorhamnetin	mRNA of Protein-tyrosine phosphatase, non-receptor type 1	229	687		0.909198	0.732
Radix Bupleuri	354	MOL000354	isorhamnetin	Estrogen receptor beta	307	869		0.93671	0.732
Radix Bupleuri	354	MOL000354	isorhamnetin	Dipeptidyl peptidase IV	332	952		0.903539	0.716
Radix Bupleuri	354	MOL000354	isorhamnetin	Mitogen-activated protein kinase 14	402	1540		0.937873	0.73
Radix Bupleuri	354	MOL000354	isorhamnetin	Glycogen synthase kinase-3 beta	422	1721		0.940964	0.732
Radix Bupleuri	354	MOL000354	isorhamnetin	Heat shock protein HSP 90	444	1939		0.968009	0.734
Radix Bupleuri	354	MOL000354	isorhamnetin	Cell division protein kinase 2	482	2240		0.950905	0.738
Radix Bupleuri	354	MOL000354	isorhamnetin	Phosphatidylinositol-4,5-bisphosphate 3-kinase catalytic subunit, gamma isoform	491	2404		0.927394	0.708
Radix Bupleuri	354	MOL000354	isorhamnetin	mRNA of PKA Catalytic Subunit C-alpha	699	6263		0.930968	0.702
Radix Bupleuri	354	MOL000354	isorhamnetin	Trypsin-1	2928	3176		0.873324	0.76
Radix Bupleuri	354	MOL000354	isorhamnetin	Proto-oncogene serine/threonine-protein kinase Pim-1	2966	2347		0.873204	0.744
Radix Bupleuri	354	MOL000354	isorhamnetin	Cyclin-A2	3025	6235		0.953801	0.716
Radix Bupleuri	354	MOL000354	isorhamnetin	Nuclear receptor coactivator 2	3276	6241		0.81305	0.808
Radix Bupleuri	354	MOL000354	isorhamnetin	Calmodulin	3907	465		0.828549	0.72
Radix Bupleuri	354	MOL000354	isorhamnetin	Glycogen phosphorylase, muscle form	350	1152		0.890527	0.706
Radix Bupleuri	354	MOL000354	isorhamnetin	Peroxisome proliferator activated receptor delta	396	1502		0.858457	0.702
Radix Bupleuri	354	MOL000354	isorhamnetin	Serine/threonine-protein kinase Chk1	647	5790		0.909534	0.7
Radix Bupleuri	354	MOL000354	isorhamnetin	Aldose reductase	288	822		0.847188	0.706
Radix Bupleuri	354	MOL000354	isorhamnetin	Nuclear receptor coactivator 1	3279	6228		0.842967	0.71
Radix Bupleuri	354	MOL000354	isorhamnetin	Coagulation factor VII	123	369		0.811891	0.7
Radix Bupleuri	354	MOL000354	isorhamnetin	Thrombin	17	54		0.930885	0.81
Radix Bupleuri	354	MOL000354	isorhamnetin	Nitric-oxide synthase, endothelial	95	291		0.927493	0.784
Radix Bupleuri	354	MOL000354	isorhamnetin	Acetylcholinesterase	165	474		0.954016	0.766
Radix Bupleuri	354	MOL000354	isorhamnetin	Gamma-aminobutyric acid receptor subunit alpha-1	309	872		0.939012	0.724
Radix Bupleuri	354	MOL000354	isorhamnetin	Amine oxidase [flavin-containing] B	565	3939		0.906895	0.704
Radix Bupleuri	354	MOL000354	isorhamnetin	Glutamate receptor 2	3216	921		0.860118	0.712
Radix Bupleuri	354	MOL000354	isorhamnetin	Cytochrome P450-cam	1143	2298		0.925441	0.794
Radix Bupleuri	354	MOL000354	isorhamnetin	Transcription factor p65	4565	h001	validated	null	null
Radix Bupleuri	354	MOL000354	isorhamnetin	Xanthine dehydrogenase/oxidase	568	3947	validated	null	null
Radix Bupleuri	354	MOL000354	isorhamnetin	Neutrophil cytosol factor 1	4391	h001	validated	null	null
Radix Bupleuri	354	MOL000354	isorhamnetin	Oxidized low-density lipoprotein receptor 1	4412	h001	validated	null	null
Radix Bupleuri	3573	MOL003573	calacorene	Prostaglandin G/H synthase 1	6	20		0.871761	0.732
Radix Bupleuri	3573	MOL003573	calacorene	Muscarinic acetylcholine receptor M3	16	51		0.944297	0.706
Radix Bupleuri	3573	MOL003573	calacorene	Muscarinic acetylcholine receptor M1	38	103		0.95174	0.73
Radix Bupleuri	3573	MOL003573	calacorene	Estrogen receptor	46	136		0.82611	0.718
Radix Bupleuri	3573	MOL003573	calacorene	Prostaglandin G/H synthase 2	94	290		0.864106	0.768
Radix Bupleuri	3573	MOL003573	calacorene	Nitric-oxide synthase, endothelial	95	291		0.840628	0.71
Radix Bupleuri	3573	MOL003573	calacorene	Alpha-2C adrenergic receptor	126	378		0.808342	0.702
Radix Bupleuri	3573	MOL003573	calacorene	Sodium-dependent noradrenaline transporter	186	540		0.903347	0.74
Radix Bupleuri	3573	MOL003573	calacorene	Alpha-1A adrenergic receptor	191	556		0.904053	0.706
Radix Bupleuri	3573	MOL003573	calacorene	Alpha-1B adrenergic receptor	216	632		0.912347	0.706
Radix Bupleuri	3573	MOL003573	calacorene	Sodium-dependent dopamine transporter	239	713		0.890229	0.7
Radix Bupleuri	3573	MOL003573	calacorene	Alpha-1D adrenergic receptor	272	789		0.827535	0.716
Radix Bupleuri	3573	MOL003573	calacorene	Sodium-dependent serotonin transporter	290	824		0.92837	0.706
Radix Bupleuri	3587	MOL003587	Acoradiene	Prostaglandin G/H synthase 1	6	20		0.94824	0.708
Radix Bupleuri	3587	MOL003587	Acoradiene	Muscarinic acetylcholine receptor M3	16	51		0.9717	0.714
Radix Bupleuri	3587	MOL003587	Acoradiene	Muscarinic acetylcholine receptor M1	38	103		0.96084	0.73
Radix Bupleuri	3587	MOL003587	Acoradiene	Prostaglandin G/H synthase 2	94	290		0.97029	0.742
Radix Bupleuri	3587	MOL003587	Acoradiene	Gamma-aminobutyric-acid receptor alpha-2 subunit	141	423		0.97955	0.73
Radix Bupleuri	3587	MOL003587	Acoradiene	Retinoic acid receptor RXR-alpha	158	459		0.94047	0.73
Radix Bupleuri	3587	MOL003587	Acoradiene	Sodium-dependent noradrenaline transporter	186	540		0.95974	0.71
Radix Bupleuri	3587	MOL003587	Acoradiene	Alpha-1A adrenergic receptor	191	556		0.87125	0.704
Radix Bupleuri	3587	MOL003587	Acoradiene	Muscarinic acetylcholine receptor M2	210	617		0.95874	0.722
Radix Bupleuri	3587	MOL003587	Acoradiene	Alpha-1B adrenergic receptor	216	632		0.93279	0.718
Radix Bupleuri	3587	MOL003587	Acoradiene	Gamma-aminobutyric acid receptor subunit alpha-1	309	872		0.98481	0.73
Radix Bupleuri	3587	MOL003587	Acoradiene	Nuclear receptor coactivator 2	3276	6241		0.90814	0.748
Radix Bupleuri	3587	MOL003587	Acoradiene	Gamma-aminobutyric-acid receptor subunit alpha-6	3284	841		0.97177	0.73
Radix Bupleuri	3587	MOL003587	Acoradiene	Neuronal acetylcholine receptor subunit alpha-2	284	813		0.92905	0.708
Radix Bupleuri	3587	MOL003587	Acoradiene	Gamma-aminobutyric-acid receptor alpha-3 subunit	200	580		0.980752	0.708
Radix Bupleuri	3587	MOL003587	Acoradiene	Sodium-dependent dopamine transporter	239	713		0.939954	0.7
Radix Bupleuri	3590	MOL003590	angelicin	Thrombin	17	54		0.8019	0.766
Radix Bupleuri	3590	MOL003590	angelicin	Cytochrome P450 1A1	4149	h001	validated	null	null
Radix Bupleuri	36	MOL000036	beta-caryophyllene	Prostaglandin G/H synthase 1	6	20		0.94544	0.706
Radix Bupleuri	36	MOL000036	beta-caryophyllene	Muscarinic acetylcholine receptor M3	16	51		0.97323	0.716
Radix Bupleuri	36	MOL000036	beta-caryophyllene	Muscarinic acetylcholine receptor M1	38	103		0.96669	0.71
Radix Bupleuri	36	MOL000036	beta-caryophyllene	Prostaglandin G/H synthase 2	94	290		0.96278	0.736
Radix Bupleuri	36	MOL000036	beta-caryophyllene	Gamma-aminobutyric-acid receptor alpha-2 subunit	141	423		0.97982	0.726
Radix Bupleuri	36	MOL000036	beta-caryophyllene	Retinoic acid receptor RXR-alpha	158	459		0.93105	0.702
Radix Bupleuri	36	MOL000036	beta-caryophyllene	Muscarinic acetylcholine receptor M2	210	617		0.96067	0.724
Radix Bupleuri	36	MOL000036	beta-caryophyllene	Alpha-1B adrenergic receptor	216	632		0.93468	0.716
Radix Bupleuri	36	MOL000036	beta-caryophyllene	Neuronal acetylcholine receptor subunit alpha-2	284	813		0.93684	0.702
Radix Bupleuri	36	MOL000036	beta-caryophyllene	Gamma-aminobutyric acid receptor subunit alpha-1	309	872		0.98475	0.728
Radix Bupleuri	36	MOL000036	beta-caryophyllene	Nuclear receptor coactivator 2	3276	6241		0.88866	0.726
Radix Bupleuri	36	MOL000036	beta-caryophyllene	Gamma-aminobutyric-acid receptor subunit alpha-6	3284	841		0.96845	0.726
Radix Bupleuri	36	MOL000036	beta-caryophyllene	Sodium-dependent noradrenaline transporter	186	540		0.95308	0.702
Radix Bupleuri	36	MOL000036	beta-caryophyllene	Alpha-1A adrenergic receptor	191	556		0.86538	0.708
Radix Bupleuri	36	MOL000036	beta-caryophyllene	Sodium-dependent dopamine transporter	239	713		0.92417	0.7
Radix Bupleuri	36	MOL000036	beta-caryophyllene	Interleukin-6	351	1159	validated	null	null
Radix Bupleuri	3686	MOL003686	Narcissoside	DNA topoisomerase II	287	817		0.852483	0.708
Radix Bupleuri	3786	MOL003786	patchoulane	Muscarinic acetylcholine receptor M3	16	51		0.97944	0.71
Radix Bupleuri	3786	MOL003786	patchoulane	Neuronal acetylcholine receptor subunit alpha-2	284	813		0.95214	0.708
Radix Bupleuri	3786	MOL003786	patchoulane	Gamma-aminobutyric acid receptor subunit alpha-1	309	872		0.97325	0.712
Radix Bupleuri	3786	MOL003786	patchoulane	Nuclear receptor coactivator 2	3276	6241		0.854592	0.7
Radix Bupleuri	382	MOL000382	Arabinose,d	Ferrichrome-iron receptor	1306	2427		0.93509	0.748
Radix Bupleuri	382	MOL000382	Arabinose,d	Bacillolysin	1961	2457		0.90343	0.728
Radix Bupleuri	3837	MOL003837	esculetin	Apoptosis regulator Bcl-2	86	273	validated	null	null
Radix Bupleuri	3837	MOL003837	esculetin	Cyclin-dependent kinase inhibitor 1	4141	h001	validated	null	null
Radix Bupleuri	3837	MOL003837	esculetin	Retinoblastoma-associated protein	2915	3846	validated	null	null
Radix Bupleuri	3837	MOL003837	esculetin	Cell division protein kinase 4	573	3959	validated	null	null
Radix Bupleuri	3837	MOL003837	esculetin	Caspase-3	4087	h001	validated	null	null
Radix Bupleuri	3837	MOL003837	esculetin	Interstitial collagenase	353	1167	validated	null	null
Radix Bupleuri	3837	MOL003837	esculetin	Stromelysin-1	441	1926	validated	null	null
Radix Bupleuri	3837	MOL003837	esculetin	Probable E3 ubiquitin-protein ligase HERC5	4441	h001	validated	null	null
Radix Bupleuri	3837	MOL003837	esculetin	Transcription factor E2F1	4560	h001	validated	null	null
Radix Bupleuri	40	MOL000040	Scopoletol	Prostaglandin G/H synthase 1	6	20		0.93289	0.786
Radix Bupleuri	40	MOL000040	Scopoletol	Thrombin	17	54		0.89645	0.782
Radix Bupleuri	40	MOL000040	Scopoletol	NRH dehydrogenase [quinone] 2	80	243		0.80687	0.708
Radix Bupleuri	40	MOL000040	Scopoletol	Prostaglandin G/H synthase 2	94	290		0.95256	0.828
Radix Bupleuri	40	MOL000040	Scopoletol	Carbonic anhydrase I	97	295		0.80448	0.706
Radix Bupleuri	40	MOL000040	Scopoletol	Beta-2 adrenergic receptor	261	766		0.85755	0.732
Radix Bupleuri	40	MOL000040	Scopoletol	Leukotriene A-4 hydrolase	521	3060		0.87199	0.716
Radix Bupleuri	40	MOL000040	Scopoletol	Amine oxidase [flavin-containing] B	565	3939		0.93876	0.744
Radix Bupleuri	40	MOL000040	Scopoletol	Glutamate receptor 2	3216	921		0.87694	0.704
Radix Bupleuri	40	MOL000040	Scopoletol	mRNA of PKA Catalytic Subunit C-alpha	699	6263		0.8262	0.7
Radix Bupleuri	40	MOL000040	Scopoletol	Sodium-dependent noradrenaline transporter	186	540		0.80058	0.714
Radix Bupleuri	40	MOL000040	Scopoletol	Queuine tRNA-ribosyltransferase	1825	2561		0.894998	0.7
Radix Bupleuri	420	MOL000420	XLS	Ferrichrome-iron receptor	1306	2427		0.93649	0.744
Radix Bupleuri	420	MOL000420	XLS	Bacillolysin	1961	2457		0.90219	0.714
Radix Bupleuri	422	MOL000422	kaempferol	Nitric oxide synthase, inducible	3	7	validated	0.859386	0.724
Radix Bupleuri	422	MOL000422	kaempferol	Prostaglandin G/H synthase 1	6	20		0.902841	0.726
Radix Bupleuri	422	MOL000422	kaempferol	Androgen receptor	48	146		0.857143	0.772
Radix Bupleuri	422	MOL000422	kaempferol	Peroxisome proliferator activated receptor gamma	78	238		0.864235	0.712
Radix Bupleuri	422	MOL000422	kaempferol	Prostaglandin G/H synthase 2	94	290	validated	0.939284	0.818
Radix Bupleuri	422	MOL000422	kaempferol	Heat shock protein HSP 90	444	1939		0.946339	0.728
Radix Bupleuri	422	MOL000422	kaempferol	Phosphatidylinositol-4,5-bisphosphate 3-kinase catalytic subunit, gamma isoform	491	2404		0.91788	0.712
Radix Bupleuri	422	MOL000422	kaempferol	mRNA of PKA Catalytic Subunit C-alpha	699	6263		0.903536	0.708
Radix Bupleuri	422	MOL000422	kaempferol	Nuclear receptor coactivator 2	3276	6241		0.802073	0.802
Radix Bupleuri	422	MOL000422	kaempferol	Dipeptidyl peptidase IV	332	952		0.85	0.7
Radix Bupleuri	422	MOL000422	kaempferol	Trypsin-1	2928	3176		0.88163	0.78
Radix Bupleuri	422	MOL000422	kaempferol	Progesterone receptor	209	614		0.90301	0.74
Radix Bupleuri	422	MOL000422	kaempferol	Thrombin	17	54		0.921031	0.728
Radix Bupleuri	422	MOL000422	kaempferol	Muscarinic acetylcholine receptor M1	38	103		0.923165	0.708
Radix Bupleuri	422	MOL000422	kaempferol	Nitric-oxide synthase, endothelial	95	291		0.88006	0.726
Radix Bupleuri	422	MOL000422	kaempferol	Gamma-aminobutyric-acid receptor alpha-2 subunit	141	423		0.949352	0.704
Radix Bupleuri	422	MOL000422	kaempferol	Acetylcholinesterase	165	474		0.903018	0.754
Radix Bupleuri	422	MOL000422	kaempferol	Sodium-dependent noradrenaline transporter	186	540		0.869197	0.702
Radix Bupleuri	422	MOL000422	kaempferol	Muscarinic acetylcholine receptor M2	210	617		0.939493	0.71
Radix Bupleuri	422	MOL000422	kaempferol	Alpha-1B adrenergic receptor	216	632		0.849848	0.722
Radix Bupleuri	422	MOL000422	kaempferol	Gamma-aminobutyric acid receptor subunit alpha-1	309	872		0.96205	0.728
Radix Bupleuri	422	MOL000422	kaempferol	DNA topoisomerase II	287	817		0.903704	0.708
Radix Bupleuri	422	MOL000422	kaempferol	Coagulation factor VII	123	369		0.842966	0.7
Radix Bupleuri	422	MOL000422	kaempferol	Calmodulin	3907	465		0.805933	0.724
Radix Bupleuri	422	MOL000422	kaempferol	Transcription factor p65	4565	h001	validated	null	null
Radix Bupleuri	422	MOL000422	kaempferol	Inhibitor of nuclear factor kappa-B kinase subunit beta	4271	h001	validated	null	null
Radix Bupleuri	422	MOL000422	kaempferol	RAC-alpha serine/threonine-protein kinase	4490	h001	validated	null	null
Radix Bupleuri	422	MOL000422	kaempferol	Apoptosis regulator Bcl-2	86	273	validated	null	null
Radix Bupleuri	422	MOL000422	kaempferol	Apoptosis regulator BAX	4033	h001	validated	null	null
Radix Bupleuri	422	MOL000422	kaempferol	Tumor necrosis factor	265	777	validated	null	null
Radix Bupleuri	422	MOL000422	kaempferol	Transcription factor AP-1	414	1629	validated	null	null
Radix Bupleuri	422	MOL000422	kaempferol	Activator of 90 kDa heat shock protein ATPase homolog 1	4007	h001	validated	null	null
Radix Bupleuri	422	MOL000422	kaempferol	Caspase-3	4087	h001	validated	null	null
Radix Bupleuri	422	MOL000422	kaempferol	Mitogen-activated protein kinase 8	704	6292	validated	null	null
Radix Bupleuri	422	MOL000422	kaempferol	Xanthine dehydrogenase/oxidase	568	3947	validated	null	null
Radix Bupleuri	422	MOL000422	kaempferol	Interstitial collagenase	353	1167	validated	null	null
Radix Bupleuri	422	MOL000422	kaempferol	Signal transducer and activator of transcription 1-alpha/beta	4525	h001	validated	null	null
Radix Bupleuri	422	MOL000422	kaempferol	Cell division control protein 2 homolog	431	1771	validated	null	null
Radix Bupleuri	422	MOL000422	kaempferol	Peroxisome proliferator-activated receptor gamma	4422	h001	validated	null	null
Radix Bupleuri	422	MOL000422	kaempferol	Heme oxygenase 1	2132	3391	validated	null	null
Radix Bupleuri	422	MOL000422	kaempferol	Cytochrome P450 3A4	621	4512	validated	null	null
Radix Bupleuri	422	MOL000422	kaempferol	Cytochrome P450 1A2	724	4200	validated	null	null
Radix Bupleuri	422	MOL000422	kaempferol	Cytochrome P450 1A1	4149	h001	validated	null	null
Radix Bupleuri	422	MOL000422	kaempferol	Intercellular adhesion molecule 1	4287	h001	validated	null	null
Radix Bupleuri	422	MOL000422	kaempferol	E-selectin	427	1756	validated	null	null
Radix Bupleuri	422	MOL000422	kaempferol	Vascular cell adhesion protein 1	440	1908	validated	null	null
Radix Bupleuri	422	MOL000422	kaempferol	Nuclear receptor subfamily 1 group I member 2	4403	h001	validated	null	null
Radix Bupleuri	422	MOL000422	kaempferol	Cytochrome P450 1B1	4150	h001	validated	null	null
Radix Bupleuri	422	MOL000422	kaempferol	Arachidonate 5-lipoxygenase	88	275	validated	null	null
Radix Bupleuri	422	MOL000422	kaempferol	Hyaluronan synthase 2	4262	h001	validated	null	null
Radix Bupleuri	422	MOL000422	kaempferol	Glutathione S-transferase P	733	904	validated	null	null
Radix Bupleuri	422	MOL000422	kaempferol	Aryl hydrocarbon receptor	3204	6220	validated	null	null
Radix Bupleuri	422	MOL000422	kaempferol	26S proteasome non-ATPase regulatory subunit 3	3993	h001	validated	null	null
Radix Bupleuri	422	MOL000422	kaempferol	Solute carrier family 2, facilitated glucose transporter member 4	4535	h001	validated	null	null
Radix Bupleuri	422	MOL000422	kaempferol	Nuclear receptor subfamily 1 group I member 3	4404	h001	validated	null	null
Radix Bupleuri	422	MOL000422	kaempferol	Insulin receptor	11	36	validated	null	null
Radix Bupleuri	422	MOL000422	kaempferol	Type I iodothyronine deiodinase	4589	h001	validated	null	null
Radix Bupleuri	422	MOL000422	kaempferol	Serine/threonine-protein phosphatase 2B catalytic subunit alpha isoform	3971	6746	validated	null	null
Radix Bupleuri	422	MOL000422	kaempferol	Peroxidase C1A	4418	h001	validated	null	null
Radix Bupleuri	422	MOL000422	kaempferol	Glutathione S-transferase Mu 1	2952	896	validated	null	null
Radix Bupleuri	422	MOL000422	kaempferol	Glutathione S-transferase Mu 2	3688	2165	validated	null	null
Radix Bupleuri	422	MOL000422	kaempferol	Aldo-keto reductase family 1 member C3	222	650	validated	null	null
Radix Bupleuri	422	MOL000422	kaempferol	Antileukoproteinase	4028	h001	validated	null	null
Radix Bupleuri	431	MOL000431	coumarin	Thrombin	17	54		0.89919	0.778
Radix Bupleuri	431	MOL000431	coumarin	Prostaglandin G/H synthase 2	94	290		0.80331	0.816
Radix Bupleuri	431	MOL000431	coumarin	Acetylcholinesterase	165	474		0.84794	0.712
Radix Bupleuri	431	MOL000431	coumarin	Amine oxidase [flavin-containing] B	565	3939		0.88978	0.732
Radix Bupleuri	431	MOL000431	coumarin	Amine oxidase [flavin-containing] A	566	3941		0.92086	0.71
Radix Bupleuri	431	MOL000431	coumarin	Apoptosis regulator BAX	4033	h001	validated	null	null
Radix Bupleuri	431	MOL000431	coumarin	Xanthine dehydrogenase/oxidase	568	3947	validated	null	null
Radix Bupleuri	431	MOL000431	coumarin	Cytochrome P450 3A4	621	4512	validated	null	null
Radix Bupleuri	431	MOL000431	coumarin	Gamma-glutamyltransferase 5	4623	h001	validated	null	null
Radix Bupleuri	431	MOL000431	coumarin	Arachidonate 5-lipoxygenase	88	275	validated	null	null
Radix Bupleuri	431	MOL000431	coumarin	Glutamate--cysteine ligase catalytic subunit	3781	186	validated	null	null
Radix Bupleuri	431	MOL000431	coumarin	Glutathione S-transferase P	733	904	validated	null	null
Radix Bupleuri	431	MOL000431	coumarin	Glutathione S-transferase A2	3674	3932	validated	null	null
Radix Bupleuri	431	MOL000431	coumarin	Aldo-keto reductase family 1 member C1	3236	139	validated	null	null
Radix Bupleuri	431	MOL000431	coumarin	Antizyme inhibitor 1	4029	h001	validated	null	null
Radix Bupleuri	431	MOL000431	coumarin	Cytochrome P450 2A6	642	5718	validated	null	null
Radix Bupleuri	4582	MOL004582	Methyl naphthalene	Amine oxidase [flavin-containing] B	565	3939		0.82527	0.732
Radix Bupleuri	4582	MOL004582	Methyl naphthalene	Lysozyme	1172	2300		0.81946	0.71
Radix Bupleuri	4587	MOL004587	Heptenoic acid	Alcohol dehydrogenase 1B	726	444		0.87724	0.71
Radix Bupleuri	4587	MOL004587	Heptenoic acid	Alcohol dehydrogenase 1C	727	517		0.90557	0.73
Radix Bupleuri	4587	MOL004587	Heptenoic acid	Trypsin-3	3952	2886		0.88598	0.7
Radix Bupleuri	4588	MOL004588	(2R)-2-methylcyclopentan-1-one	Bacillolysin	1961	2457		0.82878	0.722
Radix Bupleuri	4588	MOL004588	(2R)-2-methylcyclopentan-1-one	Trypsin-3	3952	2886		0.82294	0.702
Radix Bupleuri	4589	MOL004589	Methylheptane	Cholinesterase	559	3923		0.880073	0.7
Radix Bupleuri	4589	MOL004589	Methylheptane	mRNA of PKA Catalytic Subunit C-alpha	699	6263		0.83825	0.704
Radix Bupleuri	4589	MOL004589	Methylheptane	Trypsin-3	3952	2886		0.885159	0.704
Radix Bupleuri	4589	MOL004589	Methylheptane	Alcohol dehydrogenase 1B	726	444		0.893987	0.706
Radix Bupleuri	4589	MOL004589	Methylheptane	Alcohol dehydrogenase 1C	727	517		0.914002	0.724
Radix Bupleuri	459	MOL000459	CHEBI:39932	Alcohol dehydrogenase 1C	727	517		0.80728	0.736
Radix Bupleuri	459	MOL000459	CHEBI:39932	Trypsin-3	3952	2886		0.85403	0.7
Radix Bupleuri	4591	MOL004591	Nonenoic acid	Alcohol dehydrogenase 1B	726	444		0.84664	0.732
Radix Bupleuri	4591	MOL004591	Nonenoic acid	Alcohol dehydrogenase 1C	727	517		0.88573	0.73
Radix Bupleuri	4592	MOL004592	2-Octenic acid	Alcohol dehydrogenase 1B	726	444		0.89628	0.716
Radix Bupleuri	4592	MOL004592	2-Octenic acid	Alcohol dehydrogenase 1C	727	517		0.91866	0.714
Radix Bupleuri	4598	MOL004598	3,5,6,7-tetramethoxy-2-(3,4,5-trimethoxyphenyl)chromone	Thrombin	17	54		0.95807	0.714
Radix Bupleuri	4598	MOL004598	3,5,6,7-tetramethoxy-2-(3,4,5-trimethoxyphenyl)chromone	Estrogen receptor	46	136		0.97857	0.738
Radix Bupleuri	4598	MOL004598	3,5,6,7-tetramethoxy-2-(3,4,5-trimethoxyphenyl)chromone	Androgen receptor	48	146		0.97301	0.722
Radix Bupleuri	4598	MOL004598	3,5,6,7-tetramethoxy-2-(3,4,5-trimethoxyphenyl)chromone	Coagulation factor Xa	79	239		0.95163	0.708
Radix Bupleuri	4598	MOL004598	3,5,6,7-tetramethoxy-2-(3,4,5-trimethoxyphenyl)chromone	Prostaglandin G/H synthase 2	94	290		0.93087	0.736
Radix Bupleuri	4598	MOL004598	3,5,6,7-tetramethoxy-2-(3,4,5-trimethoxyphenyl)chromone	Coagulation factor VII	123	369		0.95659	0.7
Radix Bupleuri	4598	MOL004598	3,5,6,7-tetramethoxy-2-(3,4,5-trimethoxyphenyl)chromone	Acetylcholinesterase	165	474		0.93985	0.702
Radix Bupleuri	4598	MOL004598	3,5,6,7-tetramethoxy-2-(3,4,5-trimethoxyphenyl)chromone	DNA topoisomerase II	287	817		0.94981	0.722
Radix Bupleuri	4598	MOL004598	3,5,6,7-tetramethoxy-2-(3,4,5-trimethoxyphenyl)chromone	Estrogen receptor beta	307	869		0.98324	0.7
Radix Bupleuri	4598	MOL004598	3,5,6,7-tetramethoxy-2-(3,4,5-trimethoxyphenyl)chromone	Trypsin-1	2928	3176		0.96448	0.71
Radix Bupleuri	4598	MOL004598	3,5,6,7-tetramethoxy-2-(3,4,5-trimethoxyphenyl)chromone	Nuclear receptor coactivator 2	3276	6241		0.89839	0.752
Radix Bupleuri	4598	MOL004598	3,5,6,7-tetramethoxy-2-(3,4,5-trimethoxyphenyl)chromone	Calmodulin	3907	465		0.8381	0.72
Radix Bupleuri	4599	MOL004599	3,3,5-trimethylheptane	Gamma-aminobutyric acid receptor subunit alpha-1	309	872		0.97546	0.716
Radix Bupleuri	4599	MOL004599	3,3,5-trimethylheptane	Cholinesterase	559	3923		0.99107	0.7
Radix Bupleuri	4604	MOL004604	Heptan-3-on	Alcohol dehydrogenase 1C	727	517		0.81103	0.732
Radix Bupleuri	4608	MOL004608	(5S)-5-butyloxolan-2-one	Alcohol dehydrogenase 1B	726	444		0.863551	0.74
Radix Bupleuri	4608	MOL004608	(5S)-5-butyloxolan-2-one	Alcohol dehydrogenase 1C	727	517		0.876397	0.782
Radix Bupleuri	4608	MOL004608	(5S)-5-butyloxolan-2-one	Alcohol dehydrogenase 1A	729	251		0.859904	0.714
Radix Bupleuri	4608	MOL004608	(5S)-5-butyloxolan-2-one	Nicotinate-nucleotide--dimethylbenzimidazole phosphoribosyltransferase	2262	2264		0.813473	0.768
Radix Bupleuri	4608	MOL004608	(5S)-5-butyloxolan-2-one	Renin, renal	99	298		0.93957	0.702
Radix Bupleuri	4608	MOL004608	(5S)-5-butyloxolan-2-one	Gamma-aminobutyric acid receptor subunit alpha-1	309	872		0.8791	0.748
Radix Bupleuri	4609	MOL004609	Areapillin	Nitric oxide synthase, inducible	3	7		0.92645	0.74
Radix Bupleuri	4609	MOL004609	Areapillin	Thrombin	17	54		0.88134	0.7
Radix Bupleuri	4609	MOL004609	Areapillin	Androgen receptor	48	146		0.95046	0.768
Radix Bupleuri	4609	MOL004609	Areapillin	Sodium channel protein type 5 subunit alpha	70	220		0.92602	0.702
Radix Bupleuri	4609	MOL004609	Areapillin	Coagulation factor Xa	79	239		0.87997	0.72
Radix Bupleuri	4609	MOL004609	Areapillin	Prostaglandin G/H synthase 2	94	290		0.91773	0.77
Radix Bupleuri	4609	MOL004609	Areapillin	Coagulation factor VII	123	369		0.9101	0.734
Radix Bupleuri	4609	MOL004609	Areapillin	mRNA of Protein-tyrosine phosphatase, non-receptor type 1	229	687		0.95039	0.714
Radix Bupleuri	4609	MOL004609	Areapillin	DNA topoisomerase II	287	817		0.92226	0.726
Radix Bupleuri	4609	MOL004609	Areapillin	Estrogen receptor beta	307	869		0.97387	0.706
Radix Bupleuri	4609	MOL004609	Areapillin	Dipeptidyl peptidase IV	332	952		0.92532	0.728
Radix Bupleuri	4609	MOL004609	Areapillin	Heat shock protein HSP 90	444	1939		0.98445	0.722
Radix Bupleuri	4609	MOL004609	Areapillin	Ig gamma-1 chain C region	1201	4785		0.82358	0.7
Radix Bupleuri	4609	MOL004609	Areapillin	Trypsin-1	2928	3176		0.9572	0.774
Radix Bupleuri	4609	MOL004609	Areapillin	Nuclear receptor coactivator 2	3276	6241		0.86385	0.794
Radix Bupleuri	4609	MOL004609	Areapillin	Nuclear receptor coactivator 1	3279	6228		0.93108	0.712
Radix Bupleuri	4609	MOL004609	Areapillin	Calmodulin	3907	465		0.8582	0.726
Radix Bupleuri	4610	MOL004610	gamma-Undecalactone	Prostaglandin G/H synthase 2	94	290		0.865866	0.712
Radix Bupleuri	4610	MOL004610	gamma-Undecalactone	Gamma-aminobutyric acid receptor subunit alpha-1	309	872		0.8039	0.728
Radix Bupleuri	4613	MOL004613	6,7,3',8'-diligustilide	Androgen receptor	48	146		0.88637	0.824
Radix Bupleuri	4613	MOL004613	6,7,3',8'-diligustilide	Prostaglandin G/H synthase 2	94	290		0.82638	0.734
Radix Bupleuri	4613	MOL004613	6,7,3',8'-diligustilide	Mineralocorticoid receptor	252	737		0.85636	0.712
Radix Bupleuri	4613	MOL004613	6,7,3',8'-diligustilide	Glucocorticoid receptor	308	871		0.83796	0.712
Radix Bupleuri	4613	MOL004613	6,7,3',8'-diligustilide	Nuclear receptor coactivator 2	3276	6241		0.80059	0.72
Radix Bupleuri	4616	MOL004616	7-Octen-4-ol	Alcohol dehydrogenase 1B	726	444		0.85664	0.71
Radix Bupleuri	4616	MOL004616	7-Octen-4-ol	Alcohol dehydrogenase 1C	727	517		0.89999	0.732
Radix Bupleuri	4616	MOL004616	7-Octen-4-ol	Trypsin-3	3952	2886		0.92393	0.706
Radix Bupleuri	4617	MOL004617	Ayapanin	Prostaglandin G/H synthase 1	6	20		0.91154	0.782
Radix Bupleuri	4617	MOL004617	Ayapanin	Thrombin	17	54		0.89262	0.81
Radix Bupleuri	4617	MOL004617	Ayapanin	Prostaglandin G/H synthase 2	94	290		0.92158	0.834
Radix Bupleuri	4617	MOL004617	Ayapanin	Alpha-2A adrenergic receptor	105	318		0.83002	0.702
Radix Bupleuri	4617	MOL004617	Ayapanin	Sodium-dependent dopamine transporter	239	713		0.81119	0.714
Radix Bupleuri	4617	MOL004617	Ayapanin	Beta-2 adrenergic receptor	261	766		0.83659	0.726
Radix Bupleuri	4617	MOL004617	Ayapanin	Sodium-dependent serotonin transporter	290	824		0.80523	0.714
Radix Bupleuri	4617	MOL004617	Ayapanin	Leukotriene A-4 hydrolase	521	3060		0.85642	0.718
Radix Bupleuri	4617	MOL004617	Ayapanin	Amine oxidase [flavin-containing] B	565	3939		0.93617	0.754
Radix Bupleuri	4617	MOL004617	Ayapanin	Amine oxidase [flavin-containing] A	566	3941		0.93125	0.702
Radix Bupleuri	4617	MOL004617	Ayapanin	mRNA of PKA Catalytic Subunit C-alpha	699	6263		0.80209	0.704
Radix Bupleuri	4617	MOL004617	Ayapanin	Muscarinic acetylcholine receptor M1	38	103		0.81541	0.738
Radix Bupleuri	4617	MOL004617	Ayapanin	Alpha-1A adrenergic receptor	191	556		0.80003	0.726
Radix Bupleuri	4617	MOL004617	Ayapanin	Dipeptidyl peptidase IV	332	952		0.80587	0.718
Radix Bupleuri	4617	MOL004617	Ayapanin	cAMP-dependent protein kinase inhibitor alpha	3586	6264		0.80966	0.716
Radix Bupleuri	4619	MOL004619	8-NONENOIC ACID	Phospholipase A2	708	6500		0.86634	0.712
Radix Bupleuri	4619	MOL004619	8-NONENOIC ACID	Alcohol dehydrogenase 1B	726	444		0.91938	0.746
Radix Bupleuri	4619	MOL004619	8-NONENOIC ACID	Alcohol dehydrogenase 1C	727	517		0.94053	0.742
Radix Bupleuri	4619	MOL004619	8-NONENOIC ACID	Trypsin-3	3952	2886		0.95252	0.7
Radix Bupleuri	13187	MOL013187	Cubebin	Prostaglandin G/H synthase 1	6	20		0.891807	0.704
Radix Bupleuri	13187	MOL013187	Cubebin	Coagulation factor Xa	79	239		0.807321	0.714
Radix Bupleuri	13187	MOL013187	Cubebin	Prostaglandin G/H synthase 2	94	290		0.910665	0.766
Radix Bupleuri	13187	MOL013187	Cubebin	Beta-2 adrenergic receptor	261	766		0.942821	0.702
Radix Bupleuri	13187	MOL013187	Cubebin	Heat shock protein HSP 90	444	1939		0.914351	0.714
Radix Bupleuri	4623	MOL004623	Encecalin	Nitric oxide synthase, inducible	3	7		0.85146	0.77
Radix Bupleuri	4623	MOL004623	Encecalin	Prostaglandin G/H synthase 1	6	20		0.9064	0.788
Radix Bupleuri	4623	MOL004623	Encecalin	Dopamine D1 receptor	7	23		0.86675	0.74
Radix Bupleuri	4623	MOL004623	Encecalin	Muscarinic acetylcholine receptor M3	16	51		0.90491	0.77
Radix Bupleuri	4623	MOL004623	Encecalin	Muscarinic acetylcholine receptor M1	38	103		0.92799	0.774
Radix Bupleuri	4623	MOL004623	Encecalin	Estrogen receptor	46	136		0.91841	0.784
Radix Bupleuri	4623	MOL004623	Encecalin	Sodium channel protein type 5 subunit alpha	70	220		0.83105	0.734
Radix Bupleuri	4623	MOL004623	Encecalin	Prostaglandin G/H synthase 2	94	290		0.91949	0.818
Radix Bupleuri	4623	MOL004623	Encecalin	Nitric-oxide synthase, endothelial	95	291		0.81504	0.774
Radix Bupleuri	4623	MOL004623	Encecalin	Alpha-2A adrenergic receptor	105	318		0.80472	0.712
Radix Bupleuri	4623	MOL004623	Encecalin	Muscarinic acetylcholine receptor M4	154	450		0.87812	0.726
Radix Bupleuri	4623	MOL004623	Encecalin	Retinoic acid receptor RXR-alpha	158	459		0.92137	0.722
Radix Bupleuri	4623	MOL004623	Encecalin	CGMP-inhibited 3',5'-cyclic phosphodiesterase A	172	485		0.87081	0.73
Radix Bupleuri	4623	MOL004623	Encecalin	5-hydroxytryptamine 2A receptor	175	502		0.92048	0.708
Radix Bupleuri	4623	MOL004623	Encecalin	Sodium-dependent noradrenaline transporter	186	540		0.92218	0.722
Radix Bupleuri	4623	MOL004623	Encecalin	Alpha-1A adrenergic receptor	191	556		0.89457	0.732
Radix Bupleuri	4623	MOL004623	Encecalin	5-hydroxytryptamine 2C receptor	203	590		0.88606	0.704
Radix Bupleuri	4623	MOL004623	Encecalin	Muscarinic acetylcholine receptor M2	210	617		0.93577	0.744
Radix Bupleuri	4623	MOL004623	Encecalin	Alpha-2B adrenergic receptor	214	629		0.86323	0.702
Radix Bupleuri	4623	MOL004623	Encecalin	Alpha-1B adrenergic receptor	216	632		0.84742	0.758
Radix Bupleuri	4623	MOL004623	Encecalin	Sodium-dependent dopamine transporter	239	713		0.91846	0.728
Radix Bupleuri	4623	MOL004623	Encecalin	Beta-2 adrenergic receptor	261	766		0.93841	0.764
Radix Bupleuri	4623	MOL004623	Encecalin	Sodium-dependent serotonin transporter	290	824		0.94245	0.744
Radix Bupleuri	4623	MOL004623	Encecalin	Mu-type opioid receptor	299	847		0.85366	0.716
Radix Bupleuri	4623	MOL004623	Encecalin	Gamma-aminobutyric acid receptor subunit alpha-1	309	872		0.84902	0.748
Radix Bupleuri	4623	MOL004623	Encecalin	Heat shock protein HSP 90	444	1939		0.92401	0.706
Radix Bupleuri	4623	MOL004623	Encecalin	Beta-lactamase	499	2478		0.85683	0.706
Radix Bupleuri	4623	MOL004623	Encecalin	Neuronal acetylcholine receptor protein, alpha-7 chain	581	4095		0.83152	0.71
Radix Bupleuri	4623	MOL004623	Encecalin	Glutamate receptor 2	3216	921		0.80949	0.704
Radix Bupleuri	4623	MOL004623	Encecalin	Muscarinic acetylcholine receptor M5	87	274		0.82772	0.7
Radix Bupleuri	4624	MOL004624	Longikaurin A	Muscarinic acetylcholine receptor M1	38	103		0.839827	0.726
Radix Bupleuri	4624	MOL004624	Longikaurin A	Gamma-aminobutyric-acid receptor alpha-2 subunit	141	423		0.8608	0.722
Radix Bupleuri	4624	MOL004624	Longikaurin A	Gamma-aminobutyric-acid receptor alpha-3 subunit	200	580		0.828086	0.704
Radix Bupleuri	4624	MOL004624	Longikaurin A	Muscarinic acetylcholine receptor M2	210	617		0.887024	0.764
Radix Bupleuri	4624	MOL004624	Longikaurin A	Trypsin-1	2928	3176		0.878001	0.724
Radix Bupleuri	4624	MOL004624	Longikaurin A	Gamma-aminobutyric-acid receptor subunit alpha-6	3284	841		0.854813	0.706
Radix Bupleuri	4627	MOL004627	Methyl hexoate	Alcohol dehydrogenase 1C	727	517		0.84375	0.716
Radix Bupleuri	4627	MOL004627	Methyl hexoate	Bacillolysin	1961	2457		0.88105	0.708
Radix Bupleuri	4627	MOL004627	Methyl hexoate	Trypsin-3	3952	2886		0.85127	0.71
Radix Bupleuri	4629	MOL004629	PAC	Sodium-dependent dopamine transporter	239	713		0.86617	0.724
Radix Bupleuri	4629	MOL004629	PAC	Beta-lactamase	499	2478		0.91065	0.704
Radix Bupleuri	4629	MOL004629	PAC	Amine oxidase [flavin-containing] B	565	3939		0.86894	0.716
Radix Bupleuri	4629	MOL004629	PAC	Amine oxidase [flavin-containing] A	566	3941		0.9264	0.724
Radix Bupleuri	4629	MOL004629	PAC	Alcohol dehydrogenase 1B	726	444		0.95533	0.714
Radix Bupleuri	4629	MOL004629	PAC	Alcohol dehydrogenase 1C	727	517		0.95695	0.764
Radix Bupleuri	4629	MOL004629	PAC	Lysozyme	1172	2300		0.86643	0.782
Radix Bupleuri	4629	MOL004629	PAC	Bacillolysin	1961	2457		0.94059	0.708
Radix Bupleuri	4629	MOL004629	PAC	Nicotinate-nucleotide--dimethylbenzimidazole phosphoribosyltransferase	2262	2264		0.93946	0.74
Radix Bupleuri	4629	MOL004629	PAC	Trypsin-3	3952	2886		0.91402	0.72
Radix Bupleuri	12297	MOL012297	puerarin	Estrogen receptor	46	136		0.938044	0.71
Radix Bupleuri	12297	MOL012297	puerarin	Androgen receptor	48	146		0.83891	0.75
Radix Bupleuri	12297	MOL012297	puerarin	Prostaglandin G/H synthase 2	94	290		0.887687	0.728
Radix Bupleuri	12297	MOL012297	puerarin	Carbonic anhydrase II	117	357		0.802351	0.766
Radix Bupleuri	12297	MOL012297	puerarin	mRNA of Protein-tyrosine phosphatase, non-receptor type 1	229	687		0.896974	0.724
Radix Bupleuri	12297	MOL012297	puerarin	Glycogen synthase kinase-3 beta	422	1721		0.904291	0.704
Radix Bupleuri	12297	MOL012297	puerarin	Proto-oncogene serine/threonine-protein kinase Pim-1	2966	2347		0.882245	0.708
Radix Bupleuri	12297	MOL012297	puerarin	Calmodulin	3907	465		0.825801	0.702
Radix Bupleuri	12297	MOL012297	puerarin	Transcription factor p65	4565	h001	validated	null	null
Radix Bupleuri	12297	MOL012297	puerarin	Signal transducer and activator of transcription 3	4526	h001	validated	null	null
Radix Bupleuri	12297	MOL012297	puerarin	RAC-alpha serine/threonine-protein kinase	4490	h001	validated	null	null
Radix Bupleuri	12297	MOL012297	puerarin	Vascular endothelial growth factor A	740	183	validated	null	null
Radix Bupleuri	12297	MOL012297	puerarin	Apoptosis regulator Bcl-2	86	273	validated	null	null
Radix Bupleuri	12297	MOL012297	puerarin	Proto-oncogene c-Fos	4478	h001	validated	null	null
Radix Bupleuri	12297	MOL012297	puerarin	Apoptosis regulator BAX	4033	h001	validated	null	null
Radix Bupleuri	12297	MOL012297	puerarin	Caspase-9	4090	h001	validated	null	null
Radix Bupleuri	12297	MOL012297	puerarin	72 kDa type IV collagenase	238	707	validated	null	null
Radix Bupleuri	12297	MOL012297	puerarin	Matrix metalloproteinase-9	4334	h001	validated	null	null
Radix Bupleuri	12297	MOL012297	puerarin	Tumor necrosis factor	265	777	validated	null	null
Radix Bupleuri	12297	MOL012297	puerarin	Transcription factor AP-1	414	1629	validated	null	null
Radix Bupleuri	12297	MOL012297	puerarin	Nitric oxide synthase, inducible	3	7	validated	null	null
Radix Bupleuri	12297	MOL012297	puerarin	Caspase-3	4087	h001	validated	null	null
Radix Bupleuri	12297	MOL012297	puerarin	NF-kappa-B inhibitor alpha	4394	h001	validated	null	null
Radix Bupleuri	12297	MOL012297	puerarin	Caspase-8	4089	h001	validated	null	null
Radix Bupleuri	12297	MOL012297	puerarin	Bcl2 antagonist of cell death	4050	h001	validated	null	null
Radix Bupleuri	12297	MOL012297	puerarin	Superoxide dismutase [Cu-Zn]	597	4152	validated	null	null
Radix Bupleuri	12297	MOL012297	puerarin	Protein kinase C alpha type	4469	h001	validated	null	null
Radix Bupleuri	12297	MOL012297	puerarin	Metalloproteinase inhibitor 2	4342	h001	validated	null	null
Radix Bupleuri	12297	MOL012297	puerarin	Hypoxia-inducible factor 1-alpha	4263	h001	validated	null	null
Radix Bupleuri	12297	MOL012297	puerarin	Tumor necrosis factor receptor superfamily member 6	4588	h001	validated	null	null
Radix Bupleuri	12297	MOL012297	puerarin	Peroxisome proliferator-activated receptor gamma	4422	h001	validated	null	null
Radix Bupleuri	12297	MOL012297	puerarin	Vascular cell adhesion protein 1	440	1908	validated	null	null
Radix Bupleuri	12297	MOL012297	puerarin	Mitogen-activated protein kinase 9	700	6274	validated	null	null
Radix Bupleuri	12297	MOL012297	puerarin	Baculoviral IAP repeat-containing protein 5	4044	h001	validated	null	null
Radix Bupleuri	12297	MOL012297	puerarin	Nitric oxide synthase, endothelial	4395	h001	validated	null	null
Radix Bupleuri	12297	MOL012297	puerarin	Tissue-type plasminogen activator	434	1792	validated	null	null
Radix Bupleuri	12297	MOL012297	puerarin	Cytochrome P450 19A1	4148	h001	validated	null	null
Radix Bupleuri	12297	MOL012297	puerarin	Glutathione S-transferase P	733	904	validated	null	null
Radix Bupleuri	12297	MOL012297	puerarin	Serine/threonine-protein kinase Chk2	4513	h001	validated	null	null
Radix Bupleuri	12297	MOL012297	puerarin	P-selectin	462	2058	validated	null	null
Radix Bupleuri	12297	MOL012297	puerarin	Type-1 angiotensin II receptor	25	70	validated	null	null
Radix Bupleuri	12297	MOL012297	puerarin	Aldose reductase	288	822	validated	null	null
Radix Bupleuri	12297	MOL012297	puerarin	Interferon beta	777	1184	validated	null	null
Radix Bupleuri	12297	MOL012297	puerarin	Platelet-derived growth factor subunit A	4430	h001	validated	null	null
Radix Bupleuri	12297	MOL012297	puerarin	Angiotensin-converting enzyme 2	3936	1385	validated	null	null
Radix Bupleuri	12297	MOL012297	puerarin	Alanine aminotransferase 1	3145	735	validated	null	null
Radix Bupleuri	12297	MOL012297	puerarin	Phosphoglycolate phosphatase	4427	h001	validated	null	null
Radix Bupleuri	12297	MOL012297	puerarin	Tyrosine-protein kinase JAK3	659	5963	validated	null	null
Radix Bupleuri	12297	MOL012297	puerarin	Cyclin-dependent kinase inhibitor 1B	4142	h001	validated	null	null
Radix Bupleuri	12297	MOL012297	puerarin	CDKN2A-interacting protein	4110	h001	validated	null	null
Radix Bupleuri	12297	MOL012297	puerarin	Interferon alpha-1/13	4288	h001	validated	null	null
Radix Bupleuri	12297	MOL012297	puerarin	Integrin beta-5	4286	h001	validated	null	null
Radix Bupleuri	12297	MOL012297	puerarin	Leptin receptor	4318	h001	validated	null	null
Radix Bupleuri	12297	MOL012297	puerarin	Perilipin-2	4417	h001	validated	null	null
Radix Bupleuri	12297	MOL012297	puerarin	Proteinase-activated receptor 1	4462	h001	validated	null	null
Radix Bupleuri	4631	MOL004631	7,8,4'-Trihydroxyisoflavone	Prostaglandin G/H synthase 1	6	20		0.82372	0.736
Radix Bupleuri	4631	MOL004631	7,8,4'-Trihydroxyisoflavone	Estrogen receptor	46	136		0.93544	0.81
Radix Bupleuri	4631	MOL004631	7,8,4'-Trihydroxyisoflavone	Androgen receptor	48	146		0.84204	0.752
Radix Bupleuri	4631	MOL004631	7,8,4'-Trihydroxyisoflavone	Peroxisome proliferator activated receptor gamma	78	238		0.92488	0.724
Radix Bupleuri	4631	MOL004631	7,8,4'-Trihydroxyisoflavone	Prostaglandin G/H synthase 2	94	290		0.91172	0.814
Radix Bupleuri	4631	MOL004631	7,8,4'-Trihydroxyisoflavone	Estrogen receptor beta	307	869		0.90708	0.734
Radix Bupleuri	4631	MOL004631	7,8,4'-Trihydroxyisoflavone	Mitogen-activated protein kinase 14	402	1540		0.90977	0.754
Radix Bupleuri	4631	MOL004631	7,8,4'-Trihydroxyisoflavone	Heat shock protein HSP 90	444	1939		0.96665	0.71
Radix Bupleuri	4631	MOL004631	7,8,4'-Trihydroxyisoflavone	Cell division protein kinase 2	482	2240		0.93382	0.752
Radix Bupleuri	4631	MOL004631	7,8,4'-Trihydroxyisoflavone	Serine/threonine-protein kinase Chk1	647	5790		0.83916	0.712
Radix Bupleuri	4631	MOL004631	7,8,4'-Trihydroxyisoflavone	mRNA of PKA Catalytic Subunit C-alpha	699	6263		0.90251	0.706
Radix Bupleuri	4631	MOL004631	7,8,4'-Trihydroxyisoflavone	Trypsin-1	2928	3176		0.89253	0.78
Radix Bupleuri	4631	MOL004631	7,8,4'-Trihydroxyisoflavone	Proto-oncogene serine/threonine-protein kinase Pim-1	2966	2347		0.82891	0.712
Radix Bupleuri	4631	MOL004631	7,8,4'-Trihydroxyisoflavone	Cyclin-A2	3025	6235		0.9363	0.722
Radix Bupleuri	4631	MOL004631	7,8,4'-Trihydroxyisoflavone	Nuclear receptor coactivator 2	3276	6241		0.83334	0.832
Radix Bupleuri	4635	MOL004635	saikosaponin a	Apoptosis regulator Bcl-2	86	273	validated	null	null
Radix Bupleuri	4635	MOL004635	saikosaponin a	Apoptosis regulator BAX	4033	h001	validated	null	null
Radix Bupleuri	4635	MOL004635	saikosaponin a	Retinoblastoma-associated protein	2915	3846	validated	null	null
Radix Bupleuri	4635	MOL004635	saikosaponin a	Cyclin-dependent kinase inhibitor 2A, isoforms 1/2/3	4144	h001	validated	null	null
Radix Bupleuri	4635	MOL004635	saikosaponin a	Caspase-3	4087	h001	validated	null	null
Radix Bupleuri	4635	MOL004635	saikosaponin a	Myc proto-oncogene protein	4372	h001	validated	null	null
Radix Bupleuri	4635	MOL004635	saikosaponin a	NTF2-related export protein 1	4397	h001	validated	null	null
Radix Bupleuri	4647	MOL004647	TDA	Prostaglandin G/H synthase 1	6	20		0.81762	0.702
Radix Bupleuri	4647	MOL004647	TDA	Phospholipase A2	708	6500		0.913856	0.736
Radix Bupleuri	4647	MOL004647	TDA	Rhinovirus coat protein	709	6521		0.868622	0.708
Radix Bupleuri	4647	MOL004647	TDA	Ig gamma-1 chain C region	1201	4785		0.970632	0.702
Radix Bupleuri	4647	MOL004647	TDA	Ferrichrome-iron receptor	1306	2427		0.926879	0.714
Radix Bupleuri	4647	MOL004647	TDA	3-oxoacyl-[acyl-carrier-protein] synthase 1	1491	889		0.948325	0.722
Radix Bupleuri	4647	MOL004647	TDA	Nuclear receptor coactivator 2	3276	6241		0.900744	0.712
Radix Bupleuri	4650	MOL004650	Acetovanillin	Prostaglandin G/H synthase 1	6	20		0.947314	0.798
Radix Bupleuri	4650	MOL004650	Acetovanillin	Prostaglandin G/H synthase 2	94	290		0.962792	0.838
Radix Bupleuri	4650	MOL004650	Acetovanillin	Carbonic anhydrase I	97	295		0.86024	0.724
Radix Bupleuri	4650	MOL004650	Acetovanillin	Alpha-2A adrenergic receptor	105	318		0.833424	0.716
Radix Bupleuri	4650	MOL004650	Acetovanillin	Sodium-dependent noradrenaline transporter	186	540		0.865799	0.708
Radix Bupleuri	4650	MOL004650	Acetovanillin	Sodium-dependent dopamine transporter	239	713		0.84271	0.726
Radix Bupleuri	4650	MOL004650	Acetovanillin	Beta-2 adrenergic receptor	261	766		0.841722	0.722
Radix Bupleuri	4650	MOL004650	Acetovanillin	Gamma-aminobutyric acid receptor subunit alpha-1	309	872		0.90398	0.748
Radix Bupleuri	4650	MOL004650	Acetovanillin	Leukotriene A-4 hydrolase	521	3060		0.948011	0.724
Radix Bupleuri	4650	MOL004650	Acetovanillin	Amine oxidase [flavin-containing] B	565	3939		0.952785	0.744
Radix Bupleuri	4650	MOL004650	Acetovanillin	mRNA of PKA Catalytic Subunit C-alpha	699	6263		0.88485	0.712
Radix Bupleuri	4650	MOL004650	Acetovanillin	Chymotrypsinogen B	1696	6011		0.853396	0.708
Radix Bupleuri	4650	MOL004650	Acetovanillin	CGMP-inhibited 3',5'-cyclic phosphodiesterase A	172	485		0.881371	0.702
Radix Bupleuri	4650	MOL004650	Acetovanillin	Glutamate receptor 2	3216	921		0.956183	0.7
Radix Bupleuri	4651	MOL004651	cis-2-Undecenal	Alcohol dehydrogenase 1C	727	517		0.82189	0.708
Radix Bupleuri	4653	MOL004653	(+)-Anomalin	Thrombin	17	54		0.93952	0.73
Radix Bupleuri	4653	MOL004653	(+)-Anomalin	Potassium voltage-gated channel subfamily H member 2	37	101		0.91819	0.708
Radix Bupleuri	4653	MOL004653	(+)-Anomalin	Coagulation factor Xa	79	239		0.90411	0.72
Radix Bupleuri	4653	MOL004653	(+)-Anomalin	Prostaglandin G/H synthase 2	94	290		0.93609	0.736
Radix Bupleuri	4653	MOL004653	(+)-Anomalin	DNA topoisomerase II	287	817		0.90891	0.718
Radix Bupleuri	4653	MOL004653	(+)-Anomalin	Dipeptidyl peptidase IV	332	952		0.93224	0.702
Radix Bupleuri	4656	MOL004656	(5R)-5-isopropyl-2-methyl-1-cyclohex-2-enone	Gamma-aminobutyric-acid receptor alpha-2 subunit	141	423		0.92493	0.706
Radix Bupleuri	4656	MOL004656	(5R)-5-isopropyl-2-methyl-1-cyclohex-2-enone	Sodium-dependent noradrenaline transporter	186	540		0.81037	0.708
Radix Bupleuri	4656	MOL004656	(5R)-5-isopropyl-2-methyl-1-cyclohex-2-enone	Muscarinic acetylcholine receptor M2	210	617		0.80855	0.702
Radix Bupleuri	4656	MOL004656	(5R)-5-isopropyl-2-methyl-1-cyclohex-2-enone	Gamma-aminobutyric acid receptor subunit alpha-1	309	872		0.83413	0.74
Radix Bupleuri	4657	MOL004657	caryophyllene oxide	Muscarinic acetylcholine receptor M3	16	51		0.89386	0.722
Radix Bupleuri	4657	MOL004657	caryophyllene oxide	Thrombin	17	54		0.88322	0.716
Radix Bupleuri	4657	MOL004657	caryophyllene oxide	Muscarinic acetylcholine receptor M1	38	103		0.8967	0.724
Radix Bupleuri	4657	MOL004657	caryophyllene oxide	Prostaglandin G/H synthase 2	94	290		0.81381	0.71
Radix Bupleuri	4657	MOL004657	caryophyllene oxide	Acetylcholinesterase	165	474		0.88755	0.762
Radix Bupleuri	4657	MOL004657	caryophyllene oxide	Muscarinic acetylcholine receptor M2	210	617		0.91681	0.73
Radix Bupleuri	4657	MOL004657	caryophyllene oxide	Gamma-aminobutyric acid receptor subunit alpha-1	309	872		0.94169	0.712
Radix Bupleuri	4657	MOL004657	caryophyllene oxide	Dipeptidyl peptidase IV	332	952		0.89641	0.712
Radix Bupleuri	4658	MOL004658	cedrenol	Muscarinic acetylcholine receptor M3	16	51		0.83092	0.742
Radix Bupleuri	4658	MOL004658	cedrenol	Muscarinic acetylcholine receptor M1	38	103		0.82597	0.708
Radix Bupleuri	4658	MOL004658	cedrenol	Muscarinic acetylcholine receptor M2	210	617		0.87118	0.722
Radix Bupleuri	4658	MOL004658	cedrenol	Gamma-aminobutyric acid receptor subunit alpha-1	309	872		0.88426	0.718
Radix Bupleuri	4658	MOL004658	cedrenol	Neuronal acetylcholine receptor protein, alpha-7 chain	581	4095		0.88432	0.716
Radix Bupleuri	4662	MOL004662	Cyclohexylisocyanate	Alcohol dehydrogenase 1B	726	444		0.90311	0.758
Radix Bupleuri	4662	MOL004662	Cyclohexylisocyanate	Alcohol dehydrogenase 1C	727	517		0.91725	0.79
Radix Bupleuri	4662	MOL004662	Cyclohexylisocyanate	Alcohol dehydrogenase 1A	729	251		0.90385	0.716
Radix Bupleuri	4663	MOL004663	Vinylxylene	Lysozyme	1172	2300		0.87821	0.796
Radix Bupleuri	4664	MOL004664	heptanoic acid	Inositol-3-phosphate synthase 1	4272	h001	validated	null	null
Radix Bupleuri	4666	MOL004666	Ethyl protocatechuate	Prostaglandin G/H synthase 1	6	20		0.87597	0.774
Radix Bupleuri	4666	MOL004666	Ethyl protocatechuate	Prostaglandin G/H synthase 2	94	290		0.9112	0.83
Radix Bupleuri	4666	MOL004666	Ethyl protocatechuate	Alpha-2A adrenergic receptor	105	318		0.81069	0.72
Radix Bupleuri	4666	MOL004666	Ethyl protocatechuate	Beta-2 adrenergic receptor	261	766		0.81353	0.73
Radix Bupleuri	4666	MOL004666	Ethyl protocatechuate	Amine oxidase [flavin-containing] B	565	3939		0.88287	0.736
Radix Bupleuri	4666	MOL004666	Ethyl protocatechuate	Sodium-dependent dopamine transporter	239	713		0.801315	0.724
Radix Bupleuri	4667	MOL004667	fraxetin	Nitric oxide synthase, inducible	3	7		0.92529	0.768
Radix Bupleuri	4667	MOL004667	fraxetin	Prostaglandin G/H synthase 1	6	20		0.93633	0.804
Radix Bupleuri	4667	MOL004667	fraxetin	Thrombin	17	54		0.90368	0.748
Radix Bupleuri	4667	MOL004667	fraxetin	Estrogen receptor	46	136		0.85402	0.72
Radix Bupleuri	4667	MOL004667	fraxetin	Prostaglandin G/H synthase 2	94	290		0.9593	0.828
Radix Bupleuri	4667	MOL004667	fraxetin	Nitric-oxide synthase, endothelial	95	291		0.9048	0.778
Radix Bupleuri	4667	MOL004667	fraxetin	Carbonic anhydrase I	97	295		0.80257	0.716
Radix Bupleuri	4667	MOL004667	fraxetin	Carbonic anhydrase IV	204	592		0.8654	0.714
Radix Bupleuri	4667	MOL004667	fraxetin	Beta-2 adrenergic receptor	261	766		0.88271	0.702
Radix Bupleuri	4667	MOL004667	fraxetin	Dipeptidyl peptidase IV	332	952		0.87088	0.716
Radix Bupleuri	4667	MOL004667	fraxetin	Amine oxidase [flavin-containing] B	565	3939		0.93888	0.718
Radix Bupleuri	4667	MOL004667	fraxetin	mRNA of PKA Catalytic Subunit C-alpha	699	6263		0.86359	0.7
Radix Bupleuri	4667	MOL004667	fraxetin	Trypsin-1	2928	3176		0.8332	0.72
Radix Bupleuri	4667	MOL004667	fraxetin	Glutamate receptor 2	3216	921		0.8934	0.7
Radix Bupleuri	4667	MOL004667	fraxetin	Tumor necrosis factor	265	777	validated	null	null
Radix Bupleuri	4667	MOL004667	fraxetin	Caspase-3	4087	h001	validated	null	null
Radix Bupleuri	4667	MOL004667	fraxetin	Caspase-8	4089	h001	validated	null	null
Radix Bupleuri	4667	MOL004667	fraxetin	Fatty acid synthase	374	1295	validated	null	null
Radix Bupleuri	4667	MOL004667	fraxetin	Bone morphogenetic protein 4	4066	h001	validated	null	null
Radix Bupleuri	4668	MOL004668	GLB	Prostaglandin G/H synthase 1	6	20		0.95348	0.778
Radix Bupleuri	4668	MOL004668	GLB	Nitric-oxide synthase, brain	28	76		0.93609	0.724
Radix Bupleuri	4668	MOL004668	GLB	Arachidonate 5-lipoxygenase	88	275		0.95208	0.706
Radix Bupleuri	4668	MOL004668	GLB	Prostaglandin G/H synthase 2	94	290		0.96079	0.776
Radix Bupleuri	4668	MOL004668	GLB	Gamma-aminobutyric-acid receptor alpha-2 subunit	141	423		0.99499	0.7
Radix Bupleuri	4668	MOL004668	GLB	Glutamate [NMDA] receptor subunit epsilon 1	295	837		0.93488	0.71
Radix Bupleuri	4668	MOL004668	GLB	Gamma-aminobutyric acid receptor subunit alpha-1	309	872		0.98981	0.722
Radix Bupleuri	4668	MOL004668	GLB	Glycogen phosphorylase, muscle form	350	1152		0.94544	0.722
Radix Bupleuri	4668	MOL004668	GLB	Cathepsin D	363	1243		0.97135	0.73
Radix Bupleuri	4668	MOL004668	GLB	Lactotransferrin	390	1439		0.97055	0.702
Radix Bupleuri	4668	MOL004668	GLB	Cholinesterase	559	3923		0.97618	0.702
Radix Bupleuri	4668	MOL004668	GLB	Pancreatic alpha-amylase	622	4513		0.98914	0.716
Radix Bupleuri	4668	MOL004668	GLB	Lactase-phlorizin hydrolase	719	6847		0.99058	0.728
Radix Bupleuri	4668	MOL004668	GLB	Cytochrome P450-cam	1143	2298		0.9808	0.72
Radix Bupleuri	4668	MOL004668	GLB	Beta-galactosidase	1173	2592		0.98237	0.724
Radix Bupleuri	4668	MOL004668	GLB	Ig gamma-1 chain C region	1201	4785		0.98317	0.778
Radix Bupleuri	4668	MOL004668	GLB	Ig gamma-2 chain C region	1202	6307		0.97036	0.75
Radix Bupleuri	4668	MOL004668	GLB	Neuraminidase	1301	2676		0.99116	0.72
Radix Bupleuri	4668	MOL004668	GLB	Ferrichrome-iron receptor	1306	2427		0.99712	0.764
Radix Bupleuri	4668	MOL004668	GLB	Cyclomaltodextrin glucanotransferase	1850	2293		0.99265	0.726
Radix Bupleuri	4668	MOL004668	GLB	Mannosyl-oligosaccharide alpha-1,2-mannosidase	1863	3258		0.98522	0.706
Radix Bupleuri	4668	MOL004668	GLB	Beta-amylase	1902	3365		0.98283	0.71
Radix Bupleuri	4668	MOL004668	GLB	Endoglucanase F	1912	2440		0.98802	0.724
Radix Bupleuri	4668	MOL004668	GLB	Endoglucanase G	1913	2802		0.9957	0.752
Radix Bupleuri	4668	MOL004668	GLB	Bacillolysin	1961	2457		0.99774	0.72
Radix Bupleuri	4668	MOL004668	GLB	Mannan endo-1,4-beta-mannosidase	2012	3480		0.99021	0.724
Radix Bupleuri	4668	MOL004668	GLB	Hyaluronate lyase	2373	2485		0.9805	0.702
Radix Bupleuri	4668	MOL004668	GLB	Chondroitinase AC	2396	2581		0.97949	0.724
Radix Bupleuri	4668	MOL004668	GLB	Glycogen phosphorylase, liver form	2918	10		0.92398	0.702
Radix Bupleuri	4668	MOL004668	GLB	Prostatic acid phosphatase	2998	1859		0.97037	0.716
Radix Bupleuri	4668	MOL004668	GLB	Glutamate receptor 2	3216	921		0.97345	0.718
Radix Bupleuri	4668	MOL004668	GLB	Gamma-aminobutyric-acid receptor subunit alpha-6	3284	841		0.97689	0.702
Radix Bupleuri	4668	MOL004668	GLB	Endoplasmic reticulum mannosyl-oligosaccharide 1,2-alpha-mannosidase	3504	2577		0.98273	0.702
Radix Bupleuri	4668	MOL004668	GLB	Alpha-mannosidase 2	3786	5983		0.98853	0.74
Radix Bupleuri	4368	MOL004368	Hyperin	DNA topoisomerase II	287	817		0.903592	0.706
Radix Bupleuri	4368	MOL004368	Hyperin	mRNA of Protein-tyrosine phosphatase, non-receptor type 1	229	687		0.9328	0.702
Radix Bupleuri	4368	MOL004368	Hyperin	Trypsin-1	2928	3176		0.85925	0.702
Radix Bupleuri	4368	MOL004368	Hyperin	Nitric oxide synthase, inducible	3	7		0.877711	0.726
Radix Bupleuri	4368	MOL004368	Hyperin	Prostaglandin G/H synthase 1	6	20		0.908482	0.714
Radix Bupleuri	4368	MOL004368	Hyperin	Prostaglandin G/H synthase 2	94	290		0.945887	0.814
Radix Bupleuri	4368	MOL004368	Hyperin	Heat shock protein HSP 90	444	1939		0.96639	0.716
Radix Bupleuri	4368	MOL004368	Hyperin	Phosphatidylinositol-4,5-bisphosphate 3-kinase catalytic subunit, gamma isoform	491	2404		0.936774	0.736
Radix Bupleuri	4368	MOL004368	Hyperin	Nuclear receptor coactivator 2	3276	6241		0.808403	0.788
Radix Bupleuri	4670	MOL004670	cis-pinocampheol	Cytochrome P450-cam	1143	2298		0.90352	0.788
Radix Bupleuri	4671	MOL004671	ISOPULEGOL	Muscarinic acetylcholine receptor M1	38	103		0.96079	0.708
Radix Bupleuri	4671	MOL004671	ISOPULEGOL	Gamma-aminobutyric-acid receptor alpha-2 subunit	141	423		0.98269	0.714
Radix Bupleuri	4671	MOL004671	ISOPULEGOL	Muscarinic acetylcholine receptor M2	210	617		0.95629	0.718
Radix Bupleuri	4671	MOL004671	ISOPULEGOL	Gamma-aminobutyric acid receptor subunit alpha-1	309	872		0.95791	0.75
Radix Bupleuri	4671	MOL004671	ISOPULEGOL	Ig gamma-1 chain C region	1201	4785		0.95288	0.722
Radix Bupleuri	437	MOL000437	Hirsutrin	DNA topoisomerase II	287	817		0.900995	0.714
Radix Bupleuri	437	MOL000437	Hirsutrin	mRNA of Protein-tyrosine phosphatase, non-receptor type 1	229	687		0.934035	0.704
Radix Bupleuri	437	MOL000437	Hirsutrin	Coagulation factor Xa	79	239		0.82487	0.702
Radix Bupleuri	4673	MOL004673	kaempferitrin	DNA topoisomerase II	287	817		0.881067	0.714
Radix Bupleuri	4675	MOL004675	kaempferol-7-O-rhamnoside	Prostaglandin G/H synthase 2	94	290		0.86641	0.716
Radix Bupleuri	4677	MOL004677	ledol	Muscarinic acetylcholine receptor M3	16	51		0.878675	0.716
Radix Bupleuri	4677	MOL004677	ledol	Muscarinic acetylcholine receptor M1	38	103		0.866633	0.712
Radix Bupleuri	4677	MOL004677	ledol	Muscarinic acetylcholine receptor M2	210	617		0.906378	0.706
Radix Bupleuri	4677	MOL004677	ledol	Gamma-aminobutyric acid receptor subunit alpha-1	309	872		0.915473	0.704
Radix Bupleuri	4678	MOL004678	Limetin	Prostaglandin G/H synthase 1	6	20		0.886759	0.8
Radix Bupleuri	4678	MOL004678	Limetin	Thrombin	17	54		0.864261	0.772
Radix Bupleuri	4678	MOL004678	Limetin	Muscarinic acetylcholine receptor M1	38	103		0.838745	0.704
Radix Bupleuri	4678	MOL004678	Limetin	Prostaglandin G/H synthase 2	94	290		0.897828	0.828
Radix Bupleuri	4678	MOL004678	Limetin	Nitric-oxide synthase, endothelial	95	291		0.846307	0.78
Radix Bupleuri	4678	MOL004678	Limetin	CGMP-inhibited 3',5'-cyclic phosphodiesterase A	172	485		0.839729	0.71
Radix Bupleuri	4678	MOL004678	Limetin	Gamma-aminobutyric acid receptor subunit alpha-1	309	872		0.822314	0.736
Radix Bupleuri	4678	MOL004678	Limetin	Amine oxidase [flavin-containing] B	565	3939		0.881813	0.734
Radix Bupleuri	4678	MOL004678	Limetin	mRNA of PKA Catalytic Subunit C-alpha	699	6263		0.827259	0.728
Radix Bupleuri	4678	MOL004678	Limetin	Beta-2 adrenergic receptor	261	766		0.81744	0.704
Radix Bupleuri	4678	MOL004678	Limetin	Leukotriene A-4 hydrolase	521	3060		0.84328	0.704
Radix Bupleuri	4679	MOL004679	longifolene	Muscarinic acetylcholine receptor M3	16	51		0.97026	0.738
Radix Bupleuri	4679	MOL004679	longifolene	Muscarinic acetylcholine receptor M1	38	103		0.95637	0.7
Radix Bupleuri	4679	MOL004679	longifolene	Gamma-aminobutyric-acid receptor alpha-2 subunit	141	423		0.97003	0.7
Radix Bupleuri	4679	MOL004679	longifolene	Muscarinic acetylcholine receptor M2	210	617		0.94259	0.734
Radix Bupleuri	4679	MOL004679	longifolene	Neuronal acetylcholine receptor subunit alpha-2	284	813		0.93496	0.702
Radix Bupleuri	4679	MOL004679	longifolene	Gamma-aminobutyric acid receptor subunit alpha-1	309	872		0.96814	0.72
Radix Bupleuri	4680	MOL004680	cis-p-2-Menthen-1-ol	Muscarinic acetylcholine receptor M1	38	103		0.92204	0.718
Radix Bupleuri	4680	MOL004680	cis-p-2-Menthen-1-ol	Gamma-aminobutyric-acid receptor alpha-2 subunit	141	423		0.93791	0.718
Radix Bupleuri	4680	MOL004680	cis-p-2-Menthen-1-ol	Gamma-aminobutyric-acid receptor alpha-5 subunit	181	523		0.92331	0.712
Radix Bupleuri	4680	MOL004680	cis-p-2-Menthen-1-ol	Sodium-dependent noradrenaline transporter	186	540		0.85051	0.7
Radix Bupleuri	4680	MOL004680	cis-p-2-Menthen-1-ol	Alpha-1A adrenergic receptor	191	556		0.80784	0.704
Radix Bupleuri	4680	MOL004680	cis-p-2-Menthen-1-ol	Gamma-aminobutyric-acid receptor alpha-3 subunit	200	580		0.88643	0.71
Radix Bupleuri	4680	MOL004680	cis-p-2-Menthen-1-ol	Muscarinic acetylcholine receptor M2	210	617		0.9428	0.724
Radix Bupleuri	4680	MOL004680	cis-p-2-Menthen-1-ol	Gamma-aminobutyric acid receptor subunit alpha-1	309	872		0.86497	0.754
Radix Bupleuri	4680	MOL004680	cis-p-2-Menthen-1-ol	Ig gamma-1 chain C region	1201	4785		0.88918	0.7
Radix Bupleuri	4682	MOL004682	Methyl octylate	Alcohol dehydrogenase 1B	726	444		0.871739	0.736
Radix Bupleuri	4682	MOL004682	Methyl octylate	Alcohol dehydrogenase 1C	727	517		0.910326	0.73
Radix Bupleuri	4683	MOL004683	methyl (2E,4E)-octadeca-2,4-dienoate	Nuclear receptor coactivator 2	3276	6241		0.814347	0.71
Radix Bupleuri	4687	MOL004687	2-octanone	Arachidonate 5-lipoxygenase	88	275	validated	null	null
Radix Bupleuri	4688	MOL004688	Cumic acid	Muscarinic acetylcholine receptor M1	38	103		0.80544	0.728
Radix Bupleuri	4688	MOL004688	Cumic acid	Beta-1 adrenergic receptor	63	193		0.83583	0.732
Radix Bupleuri	4688	MOL004688	Cumic acid	Alpha-2A adrenergic receptor	105	318		0.87998	0.704
Radix Bupleuri	4688	MOL004688	Cumic acid	Alpha-2C adrenergic receptor	126	378		0.80832	0.742
Radix Bupleuri	4688	MOL004688	Cumic acid	Alpha-1A adrenergic receptor	191	556		0.85087	0.738
Radix Bupleuri	4688	MOL004688	Cumic acid	Muscarinic acetylcholine receptor M2	210	617		0.86257	0.702
Radix Bupleuri	4688	MOL004688	Cumic acid	Alpha-2B adrenergic receptor	214	629		0.87686	0.7
Radix Bupleuri	4688	MOL004688	Cumic acid	Alpha-1B adrenergic receptor	216	632		0.81876	0.72
Radix Bupleuri	4688	MOL004688	Cumic acid	Sodium-dependent dopamine transporter	239	713		0.90212	0.708
Radix Bupleuri	4688	MOL004688	Cumic acid	Beta-2 adrenergic receptor	261	766		0.82878	0.748
Radix Bupleuri	4688	MOL004688	Cumic acid	Amine oxidase [flavin-containing] B	565	3939		0.86084	0.738
Radix Bupleuri	4688	MOL004688	Cumic acid	Amine oxidase [flavin-containing] A	566	3941		0.89159	0.706
Radix Bupleuri	4688	MOL004688	Cumic acid	Sodium-dependent noradrenaline transporter	186	540		0.898463	0.7
Radix Bupleuri	2141	MOL002141	PLO	Retinoic acid receptor RXR-alpha	158	459		0.930037	0.718
Radix Bupleuri	2141	MOL002141	PLO	Progesterone receptor	209	614		0.95109	0.762
Radix Bupleuri	2141	MOL002141	PLO	Mineralocorticoid receptor	252	737		0.926406	0.722
Radix Bupleuri	2141	MOL002141	PLO	Nuclear receptor coactivator 2	3276	6241		0.84983	0.79
Radix Bupleuri	2141	MOL002141	PLO	Nuclear receptor coactivator 1	3279	6228		0.895163	0.738
Radix Bupleuri	4690	MOL004690	RNS	Ferrichrome-iron receptor	1306	2427		0.8485	0.708
Radix Bupleuri	4691	MOL004691	aldehydo-D-ribose	Ferrichrome-iron receptor	1306	2427		0.93833	0.75
Radix Bupleuri	4691	MOL004691	aldehydo-D-ribose	Bacillolysin	1961	2457		0.91074	0.716
Radix Bupleuri	415	MOL000415	rutin	DNA topoisomerase II	287	817		0.84344	0.706
Radix Bupleuri	415	MOL000415	rutin	Transcription factor p65	4565	h001	validated	null	null
Radix Bupleuri	415	MOL000415	rutin	Tumor necrosis factor	265	777	validated	null	null
Radix Bupleuri	415	MOL000415	rutin	Interleukin-6	351	1159	validated	null	null
Radix Bupleuri	415	MOL000415	rutin	Caspase-3	4087	h001	validated	null	null
Radix Bupleuri	415	MOL000415	rutin	NADPH--cytochrome P450 reductase	744	4120	validated	null	null
Radix Bupleuri	415	MOL000415	rutin	Superoxide dismutase [Cu-Zn]	597	4152	validated	null	null
Radix Bupleuri	415	MOL000415	rutin	Catalase	735	2230	validated	null	null
Radix Bupleuri	415	MOL000415	rutin	Interleukin-1 beta	418	1654	validated	null	null
Radix Bupleuri	415	MOL000415	rutin	Interleukin-8	4303	h001	validated	null	null
Radix Bupleuri	415	MOL000415	rutin	Protein kinase C beta type	4470	h001	validated	null	null
Radix Bupleuri	415	MOL000415	rutin	Arachidonate 5-lipoxygenase	88	275	validated	null	null
Radix Bupleuri	415	MOL000415	rutin	3-hydroxy-3-methylglutaryl-coenzyme A reductase	1644	3387	validated	null	null
Radix Bupleuri	415	MOL000415	rutin	Hyaluronan synthase 2	4262	h001	validated	null	null
Radix Bupleuri	415	MOL000415	rutin	Glutathione S-transferase P	733	904	validated	null	null
Radix Bupleuri	415	MOL000415	rutin	Type I iodothyronine deiodinase	4589	h001	validated	null	null
Radix Bupleuri	415	MOL000415	rutin	C5a anaphylatoxin chemotactic receptor	4072	h001	validated	null	null
Radix Bupleuri	415	MOL000415	rutin	Insulin	2882	5961	validated	null	null
Radix Bupleuri	415	MOL000415	rutin	Low affinity immunoglobulin epsilon Fc receptor	4326	h001	validated	null	null
Radix Bupleuri	415	MOL000415	rutin	Integrin beta-2	415	1630	validated	null	null
Radix Bupleuri	415	MOL000415	rutin	Thromboxane A2 receptor	294	835	validated	null	null
Radix Bupleuri	4705	MOL004705	(3E,6S,7R)-3-butylidene-6,7-dihydroxy-4,5,6,7-tetrahydroisobenzofuran-1-one	Prostaglandin G/H synthase 1	6	20		0.82564	0.752
Radix Bupleuri	4705	MOL004705	(3E,6S,7R)-3-butylidene-6,7-dihydroxy-4,5,6,7-tetrahydroisobenzofuran-1-one	Prostaglandin G/H synthase 2	94	290		0.93946	0.806
Radix Bupleuri	4705	MOL004705	(3E,6S,7R)-3-butylidene-6,7-dihydroxy-4,5,6,7-tetrahydroisobenzofuran-1-one	Gamma-aminobutyric acid receptor subunit alpha-1	309	872		0.94673	0.736
Radix Bupleuri	4705	MOL004705	(3E,6S,7R)-3-butylidene-6,7-dihydroxy-4,5,6,7-tetrahydroisobenzofuran-1-one	Glutamate receptor 2	3216	921		0.87375	0.714
Radix Bupleuri	4705	MOL004705	(3E,6S,7R)-3-butylidene-6,7-dihydroxy-4,5,6,7-tetrahydroisobenzofuran-1-one	Gamma-aminobutyric-acid receptor subunit alpha-6	3284	841		0.8647	0.708
Radix Bupleuri	4706	MOL004706	spathulenol	Muscarinic acetylcholine receptor M3	16	51		0.89781	0.728
Radix Bupleuri	4706	MOL004706	spathulenol	Muscarinic acetylcholine receptor M1	38	103		0.89459	0.706
Radix Bupleuri	4706	MOL004706	spathulenol	Muscarinic acetylcholine receptor M2	210	617		0.88904	0.734
Radix Bupleuri	4706	MOL004706	spathulenol	Gamma-aminobutyric acid receptor subunit alpha-1	309	872		0.94034	0.71
Radix Bupleuri	4707	MOL004707	tau-cadinol	Muscarinic acetylcholine receptor M3	16	51		0.91366	0.712
Radix Bupleuri	4707	MOL004707	tau-cadinol	Muscarinic acetylcholine receptor M1	38	103		0.91502	0.716
Radix Bupleuri	4707	MOL004707	tau-cadinol	Gamma-aminobutyric-acid receptor alpha-2 subunit	141	423		0.93264	0.702
Radix Bupleuri	4707	MOL004707	tau-cadinol	Muscarinic acetylcholine receptor M2	210	617		0.93822	0.702
Radix Bupleuri	4707	MOL004707	tau-cadinol	Alpha-1B adrenergic receptor	216	632		0.82367	0.712
Radix Bupleuri	4707	MOL004707	tau-cadinol	Gamma-aminobutyric acid receptor subunit alpha-1	309	872		0.94029	0.744
Radix Bupleuri	4707	MOL004707	tau-cadinol	Neuronal acetylcholine receptor protein, alpha-7 chain	581	4095		0.8839	0.7
Radix Bupleuri	4707	MOL004707	tau-cadinol	Gamma-aminobutyric-acid receptor subunit alpha-6	3284	841		0.90081	0.736
Radix Bupleuri	4708	MOL004708	δ-cadinol	Muscarinic acetylcholine receptor M3	16	51		0.902172	0.706
Radix Bupleuri	4708	MOL004708	δ-cadinol	Muscarinic acetylcholine receptor M1	38	103		0.906327	0.712
Radix Bupleuri	4708	MOL004708	δ-cadinol	Sodium-dependent noradrenaline transporter	186	540		0.813135	0.704
Radix Bupleuri	4708	MOL004708	δ-cadinol	Alpha-1B adrenergic receptor	216	632		0.807414	0.712
Radix Bupleuri	4708	MOL004708	δ-cadinol	Gamma-aminobutyric acid receptor subunit alpha-1	309	872		0.934012	0.736
Radix Bupleuri	4708	MOL004708	δ-cadinol	Gamma-aminobutyric-acid receptor subunit alpha-6	3284	841		0.887435	0.72
Radix Bupleuri	4709	MOL004709	(+)-trans-Carveol	Muscarinic acetylcholine receptor M1	38	103		0.8539	0.702
Radix Bupleuri	4709	MOL004709	(+)-trans-Carveol	Gamma-aminobutyric-acid receptor alpha-2 subunit	141	423		0.95359	0.71
Radix Bupleuri	4709	MOL004709	(+)-trans-Carveol	Sodium-dependent noradrenaline transporter	186	540		0.87345	0.712
Radix Bupleuri	4709	MOL004709	(+)-trans-Carveol	Muscarinic acetylcholine receptor M2	210	617		0.84167	0.708
Radix Bupleuri	4709	MOL004709	(+)-trans-Carveol	Gamma-aminobutyric acid receptor subunit alpha-1	309	872		0.8963	0.73
Radix Bupleuri	4710	MOL004710	DTR	Prostaglandin G/H synthase 1	6	20		0.91431	0.758
Radix Bupleuri	4710	MOL004710	DTR	Prostaglandin G/H synthase 2	94	290		0.91591	0.822
Radix Bupleuri	4710	MOL004710	DTR	mRNA of Protein-tyrosine phosphatase, non-receptor type 1	229	687		0.86098	0.72
Radix Bupleuri	4710	MOL004710	DTR	Gamma-aminobutyric acid receptor subunit alpha-1	309	872		0.80704	0.718
Radix Bupleuri	4710	MOL004710	DTR	Leukotriene A-4 hydrolase	521	3060		0.93347	0.714
Radix Bupleuri	4710	MOL004710	DTR	Amine oxidase [flavin-containing] B	565	3939		0.95501	0.73
Radix Bupleuri	4710	MOL004710	DTR	mRNA of PKA Catalytic Subunit C-alpha	699	6263		0.95405	0.736
Radix Bupleuri	4710	MOL004710	DTR	cAMP-dependent protein kinase inhibitor alpha	3586	6264		0.8358	0.734
Radix Bupleuri	4713	MOL004713	alpha-Eudesmol	Gamma-aminobutyric acid receptor subunit alpha-1	309	872		0.843576	0.746
Radix Bupleuri	4713	MOL004713	alpha-Eudesmol	Neuronal acetylcholine receptor protein, alpha-7 chain	581	4095		0.807944	0.702
Radix Bupleuri	4714	MOL004714	(1R,4S)-7,7-dimethyl-2-methylenenorbornane	Gamma-aminobutyric acid receptor subunit alpha-1	309	872		0.93089	0.7
Radix Bupleuri	4714	MOL004714	(1R,4S)-7,7-dimethyl-2-methylenenorbornane	Cytochrome P450-cam	1143	2298		0.92591	0.818
Radix Bupleuri	4715	MOL004715	(4aS,9aS)-2,9,9-trimethyl-5-methylene-4,4a,6,7,8,9a-hexahydro-3H-benzo[7]annulene	Muscarinic acetylcholine receptor M3	16	51		0.97222	0.706
Radix Bupleuri	4715	MOL004715	(4aS,9aS)-2,9,9-trimethyl-5-methylene-4,4a,6,7,8,9a-hexahydro-3H-benzo[7]annulene	Muscarinic acetylcholine receptor M1	38	103		0.96088	0.714
Radix Bupleuri	4715	MOL004715	(4aS,9aS)-2,9,9-trimethyl-5-methylene-4,4a,6,7,8,9a-hexahydro-3H-benzo[7]annulene	Prostaglandin G/H synthase 2	94	290		0.94316	0.73
Radix Bupleuri	4715	MOL004715	(4aS,9aS)-2,9,9-trimethyl-5-methylene-4,4a,6,7,8,9a-hexahydro-3H-benzo[7]annulene	Muscarinic acetylcholine receptor M2	210	617		0.9577	0.714
Radix Bupleuri	4715	MOL004715	(4aS,9aS)-2,9,9-trimethyl-5-methylene-4,4a,6,7,8,9a-hexahydro-3H-benzo[7]annulene	Alpha-1B adrenergic receptor	216	632		0.92908	0.718
Radix Bupleuri	4715	MOL004715	(4aS,9aS)-2,9,9-trimethyl-5-methylene-4,4a,6,7,8,9a-hexahydro-3H-benzo[7]annulene	Gamma-aminobutyric acid receptor subunit alpha-1	309	872		0.98107	0.7
Radix Bupleuri	4715	MOL004715	(4aS,9aS)-2,9,9-trimethyl-5-methylene-4,4a,6,7,8,9a-hexahydro-3H-benzo[7]annulene	Nuclear receptor coactivator 2	3276	6241		0.85417	0.7
Radix Bupleuri	4715	MOL004715	(4aS,9aS)-2,9,9-trimethyl-5-methylene-4,4a,6,7,8,9a-hexahydro-3H-benzo[7]annulene	Gamma-aminobutyric-acid receptor subunit alpha-6	3284	841		0.96467	0.7
Radix Bupleuri	4716	MOL004716	(1S,4R)-2,3-dimethylbicyclo[2.2.1]hept-2-ene	Alcohol dehydrogenase 1B	726	444		0.81629	0.704
Radix Bupleuri	4716	MOL004716	(1S,4R)-2,3-dimethylbicyclo[2.2.1]hept-2-ene	Cytochrome P450-cam	1143	2298		0.93904	0.804
Radix Bupleuri	4717	MOL004717	(3R,4aR,8aR)-3-isopropenyl-5,8a-dimethyl-2,3,4,4a,7,8-hexahydro-1H-naphthalene	Prostaglandin G/H synthase 1	6	20		0.89536	0.712
Radix Bupleuri	4717	MOL004717	(3R,4aR,8aR)-3-isopropenyl-5,8a-dimethyl-2,3,4,4a,7,8-hexahydro-1H-naphthalene	Muscarinic acetylcholine receptor M3	16	51		0.91883	0.738
Radix Bupleuri	4717	MOL004717	(3R,4aR,8aR)-3-isopropenyl-5,8a-dimethyl-2,3,4,4a,7,8-hexahydro-1H-naphthalene	Muscarinic acetylcholine receptor M1	38	103		0.91568	0.744
Radix Bupleuri	4717	MOL004717	(3R,4aR,8aR)-3-isopropenyl-5,8a-dimethyl-2,3,4,4a,7,8-hexahydro-1H-naphthalene	Prostaglandin G/H synthase 2	94	290		0.94114	0.77
Radix Bupleuri	4717	MOL004717	(3R,4aR,8aR)-3-isopropenyl-5,8a-dimethyl-2,3,4,4a,7,8-hexahydro-1H-naphthalene	Gamma-aminobutyric-acid receptor alpha-2 subunit	141	423		0.94409	0.704
Radix Bupleuri	4717	MOL004717	(3R,4aR,8aR)-3-isopropenyl-5,8a-dimethyl-2,3,4,4a,7,8-hexahydro-1H-naphthalene	Retinoic acid receptor RXR-alpha	158	459		0.9084	0.73
Radix Bupleuri	4717	MOL004717	(3R,4aR,8aR)-3-isopropenyl-5,8a-dimethyl-2,3,4,4a,7,8-hexahydro-1H-naphthalene	Sodium-dependent noradrenaline transporter	186	540		0.91639	0.726
Radix Bupleuri	4717	MOL004717	(3R,4aR,8aR)-3-isopropenyl-5,8a-dimethyl-2,3,4,4a,7,8-hexahydro-1H-naphthalene	Muscarinic acetylcholine receptor M2	210	617		0.9147	0.73
Radix Bupleuri	4717	MOL004717	(3R,4aR,8aR)-3-isopropenyl-5,8a-dimethyl-2,3,4,4a,7,8-hexahydro-1H-naphthalene	Alpha-1B adrenergic receptor	216	632		0.84293	0.722
Radix Bupleuri	4717	MOL004717	(3R,4aR,8aR)-3-isopropenyl-5,8a-dimethyl-2,3,4,4a,7,8-hexahydro-1H-naphthalene	Sodium-dependent dopamine transporter	239	713		0.86545	0.706
Radix Bupleuri	4717	MOL004717	(3R,4aR,8aR)-3-isopropenyl-5,8a-dimethyl-2,3,4,4a,7,8-hexahydro-1H-naphthalene	Gamma-aminobutyric acid receptor subunit alpha-1	309	872		0.96299	0.726
Radix Bupleuri	4717	MOL004717	(3R,4aR,8aR)-3-isopropenyl-5,8a-dimethyl-2,3,4,4a,7,8-hexahydro-1H-naphthalene	Nuclear receptor coactivator 2	3276	6241		0.83317	0.746
Radix Bupleuri	4717	MOL004717	(3R,4aR,8aR)-3-isopropenyl-5,8a-dimethyl-2,3,4,4a,7,8-hexahydro-1H-naphthalene	Gamma-aminobutyric-acid receptor subunit alpha-6	3284	841		0.93457	0.716
Radix Bupleuri	4718	MOL004718	α-spinasterol	Progesterone receptor	209	614		0.92249	0.716
Radix Bupleuri	4718	MOL004718	α-spinasterol	Mineralocorticoid receptor	252	737		0.9432	0.706
Radix Bupleuri	4718	MOL004718	α-spinasterol	Nuclear receptor coactivator 2	3276	6241		0.8094	0.722
Radix Bupleuri	4720	MOL004720	β-cedrene	Muscarinic acetylcholine receptor M3	16	51		0.97152	0.742
Radix Bupleuri	4720	MOL004720	β-cedrene	Muscarinic acetylcholine receptor M1	38	103		0.95399	0.716
Radix Bupleuri	4720	MOL004720	β-cedrene	Prostaglandin G/H synthase 2	94	290		0.92287	0.7
Radix Bupleuri	4720	MOL004720	β-cedrene	Gamma-aminobutyric-acid receptor alpha-2 subunit	141	423		0.97094	0.71
Radix Bupleuri	4720	MOL004720	β-cedrene	Retinoic acid receptor RXR-alpha	158	459		0.90224	0.704
Radix Bupleuri	4720	MOL004720	β-cedrene	Gamma-aminobutyric-acid receptor alpha-3 subunit	200	580		0.96397	0.7
Radix Bupleuri	4720	MOL004720	β-cedrene	Muscarinic acetylcholine receptor M2	210	617		0.9485	0.744
Radix Bupleuri	4720	MOL004720	β-cedrene	Alpha-1B adrenergic receptor	216	632		0.91585	0.704
Radix Bupleuri	4720	MOL004720	β-cedrene	Neuronal acetylcholine receptor subunit alpha-2	284	813		0.92513	0.72
Radix Bupleuri	4720	MOL004720	β-cedrene	Gamma-aminobutyric acid receptor subunit alpha-1	309	872		0.97077	0.74
Radix Bupleuri	4720	MOL004720	β-cedrene	Neuronal acetylcholine receptor protein, alpha-7 chain	581	4095		0.94614	0.7
Radix Bupleuri	4720	MOL004720	β-cedrene	Nuclear receptor coactivator 2	3276	6241		0.82583	0.716
Radix Bupleuri	4720	MOL004720	β-cedrene	Gamma-aminobutyric-acid receptor subunit alpha-6	3284	841		0.95191	0.702
Radix Bupleuri	4721	MOL004721	β-fenchene	Gamma-aminobutyric-acid receptor alpha-2 subunit	141	423		0.98137	0.7
Radix Bupleuri	4721	MOL004721	β-fenchene	Gamma-aminobutyric acid receptor subunit alpha-1	309	872		0.94721	0.716
Radix Bupleuri	4721	MOL004721	β-fenchene	Cytochrome P450-cam	1143	2298		0.93595	0.816
Radix Bupleuri	4722	MOL004722	β-oplopenone	Muscarinic acetylcholine receptor M3	16	51		0.87199	0.764
Radix Bupleuri	4722	MOL004722	β-oplopenone	Muscarinic acetylcholine receptor M1	38	103		0.89811	0.77
Radix Bupleuri	4722	MOL004722	β-oplopenone	Gamma-aminobutyric-acid receptor alpha-2 subunit	141	423		0.90908	0.728
Radix Bupleuri	4722	MOL004722	β-oplopenone	Gamma-aminobutyric-acid receptor alpha-3 subunit	200	580		0.9057	0.714
Radix Bupleuri	4722	MOL004722	β-oplopenone	Muscarinic acetylcholine receptor M2	210	617		0.92544	0.772
Radix Bupleuri	4722	MOL004722	β-oplopenone	Alpha-1B adrenergic receptor	216	632		0.81022	0.758
Radix Bupleuri	4722	MOL004722	β-oplopenone	Gamma-aminobutyric acid receptor subunit alpha-1	309	872		0.93153	0.774
Radix Bupleuri	4722	MOL004722	β-oplopenone	Neuronal acetylcholine receptor protein, alpha-7 chain	581	4095		0.88493	0.72
Radix Bupleuri	4722	MOL004722	β-oplopenone	Gamma-aminobutyric-acid receptor subunit alpha-6	3284	841		0.87594	0.74
Radix Bupleuri	4723	MOL004723	beta-Terpinene	Prostaglandin G/H synthase 1	6	20		0.939973	0.7
Radix Bupleuri	4723	MOL004723	beta-Terpinene	Muscarinic acetylcholine receptor M3	16	51		0.971915	0.714
Radix Bupleuri	4723	MOL004723	beta-Terpinene	Muscarinic acetylcholine receptor M1	38	103		0.964935	0.71
Radix Bupleuri	4723	MOL004723	beta-Terpinene	Prostaglandin G/H synthase 2	94	290		0.957297	0.734
Radix Bupleuri	4723	MOL004723	beta-Terpinene	Gamma-aminobutyric-acid receptor alpha-2 subunit	141	423		0.979141	0.722
Radix Bupleuri	4723	MOL004723	beta-Terpinene	Muscarinic acetylcholine receptor M2	210	617		0.959185	0.72
Radix Bupleuri	4723	MOL004723	beta-Terpinene	Alpha-1B adrenergic receptor	216	632		0.930492	0.718
Radix Bupleuri	4723	MOL004723	beta-Terpinene	Neuronal acetylcholine receptor subunit alpha-2	284	813		0.929196	0.7
Radix Bupleuri	4723	MOL004723	beta-Terpinene	Gamma-aminobutyric acid receptor subunit alpha-1	309	872		0.98398	0.728
Radix Bupleuri	4723	MOL004723	beta-Terpinene	Nuclear receptor coactivator 2	3276	6241		0.875597	0.734
Radix Bupleuri	4723	MOL004723	beta-Terpinene	Gamma-aminobutyric-acid receptor subunit alpha-6	3284	841		0.96751	0.728
Radix Bupleuri	4723	MOL004723	beta-Terpinene	Cytochrome P450-cam	1143	2298		0.85411	0.71
Radix Bupleuri	4723	MOL004723	beta-Terpinene	Alcohol dehydrogenase 1C	727	517		0.80371	0.726
Radix Bupleuri	4725	MOL004725	(5S)-5-hexyloxolan-2-one	Prostaglandin G/H synthase 2	94	290		0.85004	0.73
Radix Bupleuri	4725	MOL004725	(5S)-5-hexyloxolan-2-one	Sodium-dependent noradrenaline transporter	186	540		0.87966	0.704
Radix Bupleuri	4725	MOL004725	(5S)-5-hexyloxolan-2-one	Gamma-aminobutyric acid receptor subunit alpha-1	309	872		0.83221	0.738
Radix Bupleuri	4725	MOL004725	(5S)-5-hexyloxolan-2-one	Alcohol dehydrogenase 1C	727	517		0.83368	0.706
Radix Bupleuri	4725	MOL004725	(5S)-5-hexyloxolan-2-one	Prostaglandin G/H synthase 1	6	20		0.855343	0.7
Radix Bupleuri	4726	MOL004726	(5S)-5-propyloxolan-2-one	Alcohol dehydrogenase 1B	726	444		0.81029	0.706
Radix Bupleuri	4726	MOL004726	(5S)-5-propyloxolan-2-one	Alcohol dehydrogenase 1C	727	517		0.83519	0.748
Radix Bupleuri	4726	MOL004726	(5S)-5-propyloxolan-2-one	Bacillolysin	1961	2457		0.94757	0.716
Radix Bupleuri	4727	MOL004727	(1R,4aR,8aS)-1-isopropyl-7-methyl-4-methylene-2,3,4a,5,6,8a-hexahydro-1H-naphthalene	Prostaglandin G/H synthase 1	6	20		0.905552	0.72
Radix Bupleuri	4727	MOL004727	(1R,4aR,8aS)-1-isopropyl-7-methyl-4-methylene-2,3,4a,5,6,8a-hexahydro-1H-naphthalene	Muscarinic acetylcholine receptor M1	38	103		0.949785	0.724
Radix Bupleuri	4727	MOL004727	(1R,4aR,8aS)-1-isopropyl-7-methyl-4-methylene-2,3,4a,5,6,8a-hexahydro-1H-naphthalene	Prostaglandin G/H synthase 2	94	290		0.931882	0.752
Radix Bupleuri	4727	MOL004727	(1R,4aR,8aS)-1-isopropyl-7-methyl-4-methylene-2,3,4a,5,6,8a-hexahydro-1H-naphthalene	Retinoic acid receptor RXR-alpha	158	459		0.90163	0.722
Radix Bupleuri	4727	MOL004727	(1R,4aR,8aS)-1-isopropyl-7-methyl-4-methylene-2,3,4a,5,6,8a-hexahydro-1H-naphthalene	Sodium-dependent noradrenaline transporter	186	540		0.929829	0.722
Radix Bupleuri	4727	MOL004727	(1R,4aR,8aS)-1-isopropyl-7-methyl-4-methylene-2,3,4a,5,6,8a-hexahydro-1H-naphthalene	Alpha-1B adrenergic receptor	216	632		0.901689	0.706
Radix Bupleuri	4727	MOL004727	(1R,4aR,8aS)-1-isopropyl-7-methyl-4-methylene-2,3,4a,5,6,8a-hexahydro-1H-naphthalene	Gamma-aminobutyric acid receptor subunit alpha-1	309	872		0.966639	0.716
Radix Bupleuri	4727	MOL004727	(1R,4aR,8aS)-1-isopropyl-7-methyl-4-methylene-2,3,4a,5,6,8a-hexahydro-1H-naphthalene	Nuclear receptor coactivator 2	3276	6241		0.830469	0.738
Radix Bupleuri	4728	MOL004728	γ-patchoulene	Muscarinic acetylcholine receptor M3	16	51		0.96919	0.712
Radix Bupleuri	4728	MOL004728	γ-patchoulene	Prostaglandin G/H synthase 2	94	290		0.90405	0.706
Radix Bupleuri	4728	MOL004728	γ-patchoulene	Gamma-aminobutyric acid receptor subunit alpha-1	309	872		0.96664	0.71
Radix Bupleuri	479	MOL000479	Farnesene	Muscarinic acetylcholine receptor M3	16	51		0.8013	0.73
Radix Bupleuri	479	MOL000479	Farnesene	Muscarinic acetylcholine receptor M1	38	103		0.802718	0.708
Radix Bupleuri	479	MOL000479	Farnesene	Muscarinic acetylcholine receptor M2	210	617		0.852951	0.716
Radix Bupleuri	479	MOL000479	Farnesene	Gamma-aminobutyric acid receptor subunit alpha-1	309	872		0.874598	0.706
Radix Bupleuri	479	MOL000479	Farnesene	Prostaglandin G/H synthase 2	94	290		0.9519	0.714
Radix Bupleuri	479	MOL000479	Farnesene	Amine oxidase [flavin-containing] B	565	3939		0.90276	0.71
Radix Bupleuri	490	MOL000490	petunidin	Nitric oxide synthase, inducible	3	7		0.85627	0.744
Radix Bupleuri	490	MOL000490	petunidin	Prostaglandin G/H synthase 1	6	20		0.86621	0.704
Radix Bupleuri	490	MOL000490	petunidin	Prostaglandin G/H synthase 2	94	290		0.92136	0.808
Radix Bupleuri	490	MOL000490	petunidin	Estrogen receptor beta	307	869		0.92965	0.756
Radix Bupleuri	490	MOL000490	petunidin	Mitogen-activated protein kinase 14	402	1540		0.94461	0.748
Radix Bupleuri	490	MOL000490	petunidin	Glycogen synthase kinase-3 beta	422	1721		0.92539	0.718
Radix Bupleuri	490	MOL000490	petunidin	Heat shock protein HSP 90	444	1939		0.96355	0.71
Radix Bupleuri	490	MOL000490	petunidin	Nuclear receptor coactivator 2	3276	6241		0.82553	0.764
Radix Bupleuri	57	MOL000057	DIBP	Muscarinic acetylcholine receptor M3	16	51		0.81001	0.724
Radix Bupleuri	57	MOL000057	DIBP	Muscarinic acetylcholine receptor M1	38	103		0.83242	0.732
Radix Bupleuri	57	MOL000057	DIBP	Sodium-dependent noradrenaline transporter	186	540		0.82573	0.726
Radix Bupleuri	57	MOL000057	DIBP	Sodium-dependent dopamine transporter	239	713		0.8184	0.728
Radix Bupleuri	57	MOL000057	DIBP	Beta-2 adrenergic receptor	261	766		0.83186	0.722
Radix Bupleuri	57	MOL000057	DIBP	Sodium-dependent serotonin transporter	290	824		0.83615	0.716
Radix Bupleuri	57	MOL000057	DIBP	Gamma-aminobutyric acid receptor subunit alpha-1	309	872		0.80016	0.708
Radix Bupleuri	57	MOL000057	DIBP	Muscarinic acetylcholine receptor M2	210	617		0.85528	0.708
Radix Bupleuri	57	MOL000057	DIBP	5-hydroxytryptamine 2A receptor	175	502		0.80221	0.702
Radix Bupleuri	57	MOL000057	DIBP	Progesterone receptor	209	614		0.911793	0.728
Radix Bupleuri	57	MOL000057	DIBP	Mineralocorticoid receptor	252	737		0.939881	0.702
Radix Bupleuri	57	MOL000057	DIBP	Glucocorticoid receptor	308	871		0.921913	0.706
Radix Bupleuri	57	MOL000057	DIBP	Nuclear receptor coactivator 2	3276	6241		0.811622	0.71
Radix Bupleuri	57	MOL000057	DIBP	Retinoic acid receptor RXR-alpha	158	459		0.835641	0.702
Radix Bupleuri	609	MOL000609	(1R,5S)-7,7-dimethyl-4-bicyclo[3.1.1]hept-3-enecarboxaldehyde	Cytochrome P450-cam	1143	2298		0.86476	0.774
Radix Bupleuri	635	MOL000635	vanillin	Amine oxidase [flavin-containing] B	565	3939		0.835161	0.752
Radix Bupleuri	635	MOL000635	vanillin	Amine oxidase [flavin-containing] A	566	3941		0.848149	0.732
Radix Bupleuri	635	MOL000635	vanillin	Lysozyme	1172	2300		0.861297	0.744
Radix Bupleuri	635	MOL000635	vanillin	Nicotinate-nucleotide--dimethylbenzimidazole phosphoribosyltransferase	2262	2264		0.888764	0.7
Radix Bupleuri	635	MOL000635	vanillin	Prostaglandin G/H synthase 2	94	290		0.859492	0.71
Radix Bupleuri	635	MOL000635	vanillin	Gamma-aminobutyric acid receptor subunit alpha-1	309	872		0.963302	0.7
Radix Bupleuri	635	MOL000635	vanillin	Alcohol dehydrogenase 1C	727	517		0.827399	0.726
Radix Bupleuri	635	MOL000635	vanillin	Cytochrome P450-cam	1143	2298		0.884621	0.704
Radix Bupleuri	635	MOL000635	vanillin	Matrix metalloproteinase-9	4334	h001	validated	null	null
Radix Bupleuri	635	MOL000635	vanillin	Mitogen-activated protein kinase 1	354	1176	validated	null	null
Radix Bupleuri	635	MOL000635	vanillin	Transcription factor AP-1	414	1629	validated	null	null
Radix Bupleuri	666	MOL000666	hexanal	Tumor necrosis factor	265	777	validated	null	null
Radix Bupleuri	666	MOL000666	hexanal	Transcription factor AP-1	414	1629	validated	null	null
Radix Bupleuri	666	MOL000666	hexanal	Tissue factor	466	2139	validated	null	null
Radix Bupleuri	666	MOL000666	hexanal	Mitogen-activated protein kinase 10	438	1836	validated	null	null
Radix Bupleuri	666	MOL000666	hexanal	Abl interactor 1	4004	h001	validated	null	null
Radix Bupleuri	666	MOL000666	hexanal	Platelet glycoprotein 4	4433	h001	validated	null	null
Radix Bupleuri	667	MOL000667	1-hexanol	Calponin-3	4078	h001	validated	null	null
Radix Bupleuri	668	MOL000668	PENTYLFURAN	Sodium-dependent noradrenaline transporter	186	540		0.817924	0.714
Radix Bupleuri	668	MOL000668	PENTYLFURAN	Alpha-1A adrenergic receptor	191	556		0.840761	0.706
Radix Bupleuri	675	MOL000675	oleic acid	Prostaglandin G/H synthase 1	6	20		0.825814	0.742
Radix Bupleuri	675	MOL000675	oleic acid	Nuclear receptor coactivator 2	3276	6241		0.847196	0.718
Radix Bupleuri	675	MOL000675	oleic acid	Prostaglandin G/H synthase 2	94	290		0.829692	0.756
Radix Bupleuri	675	MOL000675	oleic acid	Alcohol dehydrogenase 1B	726	444		0.978019	0.722
Radix Bupleuri	675	MOL000675	oleic acid	Alcohol dehydrogenase 1C	727	517		0.982371	0.752
Radix Bupleuri	675	MOL000675	oleic acid	Alcohol dehydrogenase 1A	729	251		0.982227	0.716
Radix Bupleuri	675	MOL000675	oleic acid	Lysozyme	1172	2300		0.910117	0.712
Radix Bupleuri	675	MOL000675	oleic acid	Nicotinate-nucleotide--dimethylbenzimidazole phosphoribosyltransferase	2262	2264		0.966749	0.756
Radix Bupleuri	675	MOL000675	oleic acid	Trypsin-3	3952	2886		0.879831	0.716
Radix Bupleuri	675	MOL000675	oleic acid	Retinoic acid receptor RXR-alpha	158	459		0.933336	0.71
Radix Bupleuri	675	MOL000675	oleic acid	Cytochrome P450-cam	1143	2298		0.862648	0.732
Radix Bupleuri	675	MOL000675	oleic acid	Urokinase-type plasminogen activator	346	1074	validated	null	null
Radix Bupleuri	675	MOL000675	oleic acid	Superoxide dismutase [Cu-Zn]	597	4152	validated	null	null
Radix Bupleuri	675	MOL000675	oleic acid	Catalase	735	2230	validated	null	null
Radix Bupleuri	675	MOL000675	oleic acid	Telomerase protein component 1	4549	h001	validated	null	null
Radix Bupleuri	675	MOL000675	oleic acid	Endothelin-1	4187	h001	validated	null	null
Radix Bupleuri	675	MOL000675	oleic acid	Receptor tyrosine-protein kinase erbB-2	4496	h001	validated	null	null
Radix Bupleuri	675	MOL000675	oleic acid	Peroxisome proliferator-activated receptor gamma	4422	h001	validated	null	null
Radix Bupleuri	675	MOL000675	oleic acid	Lipoprotein lipase	83	266	validated	null	null
Radix Bupleuri	675	MOL000675	oleic acid	Neuromodulin	4385	h001	validated	null	null
Radix Bupleuri	675	MOL000675	oleic acid	Plasminogen activator inhibitor 1	4429	h001	validated	null	null
Radix Bupleuri	675	MOL000675	oleic acid	Brain-derived neurotrophic factor	4068	h001	validated	null	null
Radix Bupleuri	675	MOL000675	oleic acid	3-hydroxy-3-methylglutaryl-coenzyme A reductase	1644	3387	validated	null	null
Radix Bupleuri	675	MOL000675	oleic acid	Myeloperoxidase	428	1757	validated	null	null
Radix Bupleuri	675	MOL000675	oleic acid	Peroxisome proliferator-activated receptor alpha	4420	h001	validated	null	null
Radix Bupleuri	675	MOL000675	oleic acid	Peroxisome proliferator-activated receptor delta	4421	h001	validated	null	null
Radix Bupleuri	675	MOL000675	oleic acid	C-reactive protein	4130	h001	validated	null	null
Radix Bupleuri	675	MOL000675	oleic acid	Serum paraoxonase/arylesterase 1	357	1198	validated	null	null
Radix Bupleuri	675	MOL000675	oleic acid	Insulin	2882	5961	validated	null	null
Radix Bupleuri	675	MOL000675	oleic acid	Plasminogen	76	234	validated	null	null
Radix Bupleuri	675	MOL000675	oleic acid	Fatty acid-binding protein, liver	4201	h001	validated	null	null
Radix Bupleuri	675	MOL000675	oleic acid	Retinol-binding protein 2	4499	h001	validated	null	null
Radix Bupleuri	675	MOL000675	oleic acid	Glucagon	4227	h001	validated	null	null
Radix Bupleuri	675	MOL000675	oleic acid	Glutamyl aminopeptidase	578	4020	validated	null	null
Radix Bupleuri	675	MOL000675	oleic acid	Mitochondrial uncoupling protein 2	4355	h001	validated	null	null
Radix Bupleuri	675	MOL000675	oleic acid	Sterol O-acyltransferase 1	3202	117	validated	null	null
Radix Bupleuri	675	MOL000675	oleic acid	Cholecystokinin	4118	h001	validated	null	null
Radix Bupleuri	675	MOL000675	oleic acid	Cbp/p300-interacting transactivator 1	4096	h001	validated	null	null
Radix Bupleuri	675	MOL000675	oleic acid	BDNF/NT-3 growth factors receptor	768	6100	validated	null	null
Radix Bupleuri	675	MOL000675	oleic acid	Pancreas/duodenum homeobox protein 1	4413	h001	validated	null	null
Radix Bupleuri	675	MOL000675	oleic acid	Solute carrier family 2, facilitated glucose transporter member 2	4534	h001	validated	null	null
Radix Bupleuri	675	MOL000675	oleic acid	Peptidyl-glycine alpha-amidating monooxygenase	3018	3943	validated	null	null
Radix Bupleuri	675	MOL000675	oleic acid	Acyl-CoA desaturase	4011	h001	validated	null	null
Radix Bupleuri	675	MOL000675	oleic acid	Mitochondrial uncoupling protein 3	4356	h001	validated	null	null
Radix Bupleuri	675	MOL000675	oleic acid	Cholesteryl ester transfer protein	4119	h001	validated	null	null
Radix Bupleuri	675	MOL000675	oleic acid	Peptide YY	4416	h001	validated	null	null
Radix Bupleuri	675	MOL000675	oleic acid	Aspartyl aminopeptidase	3754	4026	validated	null	null
Radix Bupleuri	675	MOL000675	oleic acid	Cell-death-related nuclease 7	4111	h001	validated	null	null
Radix Bupleuri	676	MOL000676	DBP	Muscarinic acetylcholine receptor M3	16	51		0.80329	0.73
Radix Bupleuri	676	MOL000676	DBP	Muscarinic acetylcholine receptor M1	38	103		0.82521	0.74
Radix Bupleuri	676	MOL000676	DBP	Sodium-dependent noradrenaline transporter	186	540		0.82861	0.734
Radix Bupleuri	676	MOL000676	DBP	Sodium-dependent dopamine transporter	239	713		0.84713	0.732
Radix Bupleuri	676	MOL000676	DBP	Beta-2 adrenergic receptor	261	766		0.84881	0.708
Radix Bupleuri	676	MOL000676	DBP	Sodium-dependent serotonin transporter	290	824		0.86104	0.714
Radix Bupleuri	676	MOL000676	DBP	Prostaglandin G/H synthase 1	6	20		0.839334	0.746
Radix Bupleuri	676	MOL000676	DBP	Prostaglandin G/H synthase 2	94	290		0.923774	0.804
Radix Bupleuri	676	MOL000676	DBP	Nitric-oxide synthase, endothelial	95	291		0.825449	0.73
Radix Bupleuri	676	MOL000676	DBP	Retinoic acid receptor RXR-alpha	158	459		0.898354	0.7
Radix Bupleuri	676	MOL000676	DBP	Glycogen synthase kinase-3 beta	422	1721		0.892078	0.702
Radix Bupleuri	676	MOL000676	DBP	Heat shock protein HSP 90	444	1939		0.970623	0.704
Radix Bupleuri	676	MOL000676	DBP	Beta-lactamase	499	2478		0.901195	0.734
Radix Bupleuri	676	MOL000676	DBP	mRNA of PKA Catalytic Subunit C-alpha	699	6263		0.921925	0.702
Radix Bupleuri	676	MOL000676	DBP	CGMP-inhibited 3',5'-cyclic phosphodiesterase A	172	485		0.817375	0.714
Radix Bupleuri	676	MOL000676	DBP	Alpha-1A adrenergic receptor	191	556		0.816174	0.712
Radix Bupleuri	676	MOL000676	DBP	Muscarinic acetylcholine receptor M2	210	617		0.902037	0.71
Radix Bupleuri	676	MOL000676	DBP	Ig gamma-1 chain C region	1201	4785		0.80891	0.714
Radix Bupleuri	676	MOL000676	DBP	5-hydroxytryptamine 2A receptor	175	502		0.826698	0.708
Radix Bupleuri	676	MOL000676	DBP	Gamma-aminobutyric acid receptor subunit alpha-1	309	872		0.808382	0.72
Radix Bupleuri	676	MOL000676	DBP	Neuronal acetylcholine receptor protein, alpha-7 chain	581	4095		0.853906	0.708
Radix Bupleuri	676	MOL000676	DBP	Gamma-aminobutyric-acid receptor subunit alpha-6	3284	841		0.912794	0.728
Radix Bupleuri	69	MOL000069	palmitic acid	Cathepsin D	363	1243		0.924308	0.72
Radix Bupleuri	69	MOL000069	palmitic acid	Alcohol dehydrogenase 1B	726	444		0.906377	0.71
Radix Bupleuri	69	MOL000069	palmitic acid	Alcohol dehydrogenase 1C	727	517		0.923102	0.74
Radix Bupleuri	69	MOL000069	palmitic acid	Prostaglandin G/H synthase 1	6	20		0.84976	0.73
Radix Bupleuri	69	MOL000069	palmitic acid	Prostaglandin G/H synthase 2	94	290		0.81267	0.756
Radix Bupleuri	69	MOL000069	palmitic acid	Rhodopsin	477	2207		0.94961	0.704
Radix Bupleuri	69	MOL000069	palmitic acid	Ig gamma-1 chain C region	1201	4785		0.97902	0.726
Radix Bupleuri	69	MOL000069	palmitic acid	Ferrichrome-iron receptor	1306	2427		0.94011	0.714
Radix Bupleuri	69	MOL000069	palmitic acid	Nuclear receptor coactivator 2	3276	6241		0.93012	0.734
Radix Bupleuri	69	MOL000069	palmitic acid	Apoptosis regulator Bcl-2	86	273	validated	null	null
Radix Bupleuri	69	MOL000069	palmitic acid	Interleukin-10	4292	h001	validated	null	null
Radix Bupleuri	69	MOL000069	palmitic acid	Tumor necrosis factor	265	777	validated	null	null
Radix Bupleuri	69	MOL000069	palmitic acid	Collagen alpha-1(I) chain	731	28	validated	null	null
Radix Bupleuri	69	MOL000069	palmitic acid	Phosphatidylinositol-3,4,5-trisphosphate 3-phosphatase and dual-specificity protein phosphatase PTEN	4620	h001	validated	null	null
Radix Bupleuri	69	MOL000069	palmitic acid	Putative beta-glucuronidase-like protein SMA3	4486	h001	validated	null	null
Radix Bupleuri	69	MOL000069	palmitic acid	Solute carrier family 22 member 5	4532	h001	validated	null	null
Radix Bupleuri	69	MOL000069	palmitic acid	Choline-phosphate cytidylyltransferase A	3542	677	validated	null	null
Radix Bupleuri	708	MOL000708	WLN: VHR	Alcohol dehydrogenase 1B	726	444		0.931288	0.714
Radix Bupleuri	708	MOL000708	WLN: VHR	Alcohol dehydrogenase 1C	727	517		0.943531	0.756
Radix Bupleuri	708	MOL000708	WLN: VHR	Alcohol dehydrogenase 1A	729	251		0.940021	0.702
Radix Bupleuri	708	MOL000708	WLN: VHR	Lysozyme	1172	2300		0.830678	0.796
Radix Bupleuri	708	MOL000708	WLN: VHR	Nicotinate-nucleotide--dimethylbenzimidazole phosphoribosyltransferase	2262	2264		0.920293	0.79
Radix Bupleuri	708	MOL000708	WLN: VHR	Trypsin-3	3952	2886		0.807824	0.728
Radix Bupleuri	715	MOL000715	l-Menthone	Gamma-aminobutyric-acid receptor alpha-2 subunit	141	423		0.9799	0.712
Radix Bupleuri	715	MOL000715	l-Menthone	Gamma-aminobutyric-acid receptor alpha-5 subunit	181	523		0.969194	0.702
Radix Bupleuri	715	MOL000715	l-Menthone	Muscarinic acetylcholine receptor M2	210	617		0.951049	0.722
Radix Bupleuri	715	MOL000715	l-Menthone	Gamma-aminobutyric acid receptor subunit alpha-1	309	872		0.952399	0.736
Radix Bupleuri	715	MOL000715	l-Menthone	Cytochrome P450-cam	1143	2298		0.924018	0.708
Radix Bupleuri	715	MOL000715	l-Menthone	Ig gamma-1 chain C region	1201	4785		0.953715	0.708
Radix Bupleuri	715	MOL000715	l-Menthone	Cholinesterase	559	3923		0.94152	0.702
Radix Bupleuri	715	MOL000715	l-Menthone	Muscarinic acetylcholine receptor M3	16	51		0.955209	0.732
Radix Bupleuri	715	MOL000715	l-Menthone	Muscarinic acetylcholine receptor M1	38	103		0.959908	0.742
Radix Bupleuri	715	MOL000715	l-Menthone	Gamma-aminobutyric-acid receptor alpha-3 subunit	200	580		0.948764	0.7
Radix Bupleuri	715	MOL000715	l-Menthone	Alpha-1B adrenergic receptor	216	632		0.886145	0.718
Radix Bupleuri	715	MOL000715	l-Menthone	Neuronal acetylcholine receptor subunit alpha-2	284	813		0.941844	0.7
Radix Bupleuri	716	MOL000716	trans-2-nonenal	Alcohol dehydrogenase 1B	726	444		0.83217	0.742
Radix Bupleuri	716	MOL000716	trans-2-nonenal	Alcohol dehydrogenase 1C	727	517		0.8748	0.732
Radix Bupleuri	716	MOL000716	trans-2-nonenal	Trypsin-3	3952	2886		0.84551	0.702
Radix Bupleuri	716	MOL000716	trans-2-nonenal	Neutrophil elastase	4392	h001	validated	null	null
Radix Bupleuri	716	MOL000716	trans-2-nonenal	Lithostathine-1-alpha	4324	h001	validated	null	null
Radix Bupleuri	716	MOL000716	trans-2-nonenal	Membrane-associated guanylate kinase, WW and PDZ domain-containing protein 2	4337	h001	validated	null	null
Radix Bupleuri	723	MOL000723	trans-2,4-decadienal	Gamma-aminobutyric-acid receptor alpha-2 subunit	141	423		0.915377	0.712
Radix Bupleuri	723	MOL000723	trans-2,4-decadienal	Gamma-aminobutyric acid receptor subunit alpha-1	309	872		0.833194	0.736
Radix Bupleuri	723	MOL000723	trans-2,4-decadienal	Cytochrome P450-cam	1143	2298		0.816004	0.71
Radix Bupleuri	723	MOL000723	trans-2,4-decadienal	Alcohol dehydrogenase 1C	727	517		0.821001	0.706
Radix Bupleuri	723	MOL000723	trans-2,4-decadienal	G1/S-specific cyclin-D1	4214	h001	validated	null	null
Radix Bupleuri	723	MOL000723	trans-2,4-decadienal	Eukaryotic translation initiation factor 6	4197	h001	validated	null	null
Radix Bupleuri	723	MOL000723	trans-2,4-decadienal	Retinoblastoma-associated protein	2915	3846	validated	null	null
Radix Bupleuri	723	MOL000723	trans-2,4-decadienal	Cell division protein kinase 4	573	3959	validated	null	null
Radix Bupleuri	860	MOL000860	stearic acid	Prostaglandin G/H synthase 1	6	20		0.888509	0.772
Radix Bupleuri	860	MOL000860	stearic acid	Prostaglandin G/H synthase 2	94	290		0.882215	0.776
Radix Bupleuri	860	MOL000860	stearic acid	Retinoic acid receptor RXR-alpha	158	459		0.93637	0.716
Radix Bupleuri	860	MOL000860	stearic acid	Nuclear receptor coactivator 2	3276	6241		0.820418	0.728
Radix Bupleuri	860	MOL000860	stearic acid	Ig gamma-1 chain C region	1201	4785		0.97116	0.702
Radix Bupleuri	860	MOL000860	stearic acid	Transcription factor Sp1	4567	h001	validated	null	null
Radix Bupleuri	860	MOL000860	stearic acid	Ectonucleotide pyrophosphatase/phosphodiesterase family member 7	4183	h001	validated	null	null
Radix Bupleuri	873	MOL000873	CYH	Cytochrome P450-cam	1143	2298		0.91063	0.736
Radix Bupleuri	873	MOL000873	CYH	Bacillolysin	1961	2457		0.84632	0.706
Radix Bupleuri	873	MOL000873	CYH	Gamma-aminobutyric-acid receptor alpha-2 subunit	141	423		0.877271	0.726
Radix Bupleuri	878	MOL000878	Farnesylacetone	Prostaglandin G/H synthase 2	94	290		0.95581	0.72
Radix Bupleuri	878	MOL000878	Farnesylacetone	Nuclear receptor coactivator 2	3276	6241		0.94109	0.706
Radix Bupleuri	878	MOL000878	Farnesylacetone	Prostaglandin G/H synthase 1	6	20		0.932027	0.71
Radix Bupleuri	878	MOL000878	Farnesylacetone	Muscarinic acetylcholine receptor M1	38	103		0.836923	0.704
Radix Bupleuri	878	MOL000878	Farnesylacetone	Muscarinic acetylcholine receptor M2	210	617		0.868117	0.702
Radix Bupleuri	886	MOL000886	tetradecane	Tumor necrosis factor	265	777	validated	null	null
Radix Bupleuri	922	MOL000922	(R)-p-Menth-1-en-4-ol	Muscarinic acetylcholine receptor M3	16	51		0.939302	0.704
Radix Bupleuri	922	MOL000922	(R)-p-Menth-1-en-4-ol	Muscarinic acetylcholine receptor M1	38	103		0.93519	0.716
Radix Bupleuri	922	MOL000922	(R)-p-Menth-1-en-4-ol	Gamma-aminobutyric-acid receptor alpha-2 subunit	141	423		0.984875	0.738
Radix Bupleuri	922	MOL000922	(R)-p-Menth-1-en-4-ol	Gamma-aminobutyric-acid receptor alpha-5 subunit	181	523		0.977888	0.718
Radix Bupleuri	922	MOL000922	(R)-p-Menth-1-en-4-ol	Sodium-dependent noradrenaline transporter	186	540		0.935539	0.7
Radix Bupleuri	922	MOL000922	(R)-p-Menth-1-en-4-ol	Gamma-aminobutyric-acid receptor alpha-3 subunit	200	580		0.958215	0.732
Radix Bupleuri	922	MOL000922	(R)-p-Menth-1-en-4-ol	Muscarinic acetylcholine receptor M2	210	617		0.935071	0.724
Radix Bupleuri	922	MOL000922	(R)-p-Menth-1-en-4-ol	Neuronal acetylcholine receptor subunit alpha-2	284	813		0.918495	0.702
Radix Bupleuri	922	MOL000922	(R)-p-Menth-1-en-4-ol	Gamma-aminobutyric acid receptor subunit alpha-1	309	872		0.95719	0.764
Radix Bupleuri	922	MOL000922	(R)-p-Menth-1-en-4-ol	Cytochrome P450-cam	1143	2298		0.871716	0.7
Radix Bupleuri	922	MOL000922	(R)-p-Menth-1-en-4-ol	Gamma-aminobutyric-acid receptor subunit alpha-6	3284	841		0.96463	0.712
Radix Bupleuri	922	MOL000922	(R)-p-Menth-1-en-4-ol	Ig gamma-1 chain C region	1201	4785		0.96061	0.716
Radix Bupleuri	922	MOL000922	(R)-p-Menth-1-en-4-ol	Retinoic acid receptor RXR-alpha	158	459		0.87283	0.7
Radix Bupleuri	922	MOL000922	(R)-p-Menth-1-en-4-ol	Progesterone receptor	209	614		0.932522	0.746
Radix Bupleuri	922	MOL000922	(R)-p-Menth-1-en-4-ol	Mineralocorticoid receptor	252	737		0.910947	0.716
Radix Bupleuri	922	MOL000922	(R)-p-Menth-1-en-4-ol	Nuclear receptor coactivator 2	3276	6241		0.823058	0.774
Radix Bupleuri	922	MOL000922	(R)-p-Menth-1-en-4-ol	Nuclear receptor coactivator 1	3279	6228		0.863063	0.74
Radix Bupleuri	922	MOL000922	(R)-p-Menth-1-en-4-ol	Alpha-1B adrenergic receptor	216	632		0.891249	0.7
Radix Bupleuri	922	MOL000922	(R)-p-Menth-1-en-4-ol	Prostaglandin G/H synthase 1	6	20		0.93885	0.734
Radix Bupleuri	922	MOL000922	(R)-p-Menth-1-en-4-ol	Potassium voltage-gated channel subfamily H member 2	37	101		0.932679	0.728
Radix Bupleuri	922	MOL000922	(R)-p-Menth-1-en-4-ol	Sodium channel protein type 5 subunit alpha	70	220		0.958497	0.732
Radix Bupleuri	922	MOL000922	(R)-p-Menth-1-en-4-ol	Coagulation factor Xa	79	239		0.849076	0.716
Radix Bupleuri	922	MOL000922	(R)-p-Menth-1-en-4-ol	Prostaglandin G/H synthase 2	94	290		0.949443	0.81
Radix Bupleuri	922	MOL000922	(R)-p-Menth-1-en-4-ol	5-hydroxytryptamine receptor 3A	113	341		0.917521	0.704
Radix Bupleuri	922	MOL000922	(R)-p-Menth-1-en-4-ol	CGMP-inhibited 3',5'-cyclic phosphodiesterase A	172	485		0.948491	0.712
Radix Bupleuri	922	MOL000922	(R)-p-Menth-1-en-4-ol	Beta-2 adrenergic receptor	261	766		0.957568	0.732
Radix Bupleuri	922	MOL000922	(R)-p-Menth-1-en-4-ol	Alpha-1D adrenergic receptor	272	789		0.832176	0.72
Radix Bupleuri	922	MOL000922	(R)-p-Menth-1-en-4-ol	Heat shock protein HSP 90	444	1939		0.963674	0.716
Radix Bupleuri	922	MOL000922	(R)-p-Menth-1-en-4-ol	Calmodulin	3907	465		0.819226	0.764
Radix Bupleuri	924	MOL000924	Mnk	Alcohol dehydrogenase 1C	727	517		0.906193	0.704
Radix Bupleuri	924	MOL000924	Mnk	Ig gamma-1 chain C region	1201	4785		0.877348	0.7
Radix Bupleuri	974	MOL000974	cuminal	Amine oxidase [flavin-containing] B	565	3939		0.82731	0.726
Radix Bupleuri	974	MOL000974	cuminal	Amine oxidase [flavin-containing] A	566	3941		0.81426	0.71
Radix Bupleuri	974	MOL000974	cuminal	Glucocorticoid receptor	308	871		0.910715	0.712
Radix Bupleuri	98	MOL000098	quercetin	Prostaglandin G/H synthase 1	6	20	validated	0.901555	0.716
Radix Bupleuri	98	MOL000098	quercetin	Androgen receptor	48	146	validated	0.857042	0.77
Radix Bupleuri	98	MOL000098	quercetin	Peroxisome proliferator activated receptor gamma	78	238		0.884196	0.708
Radix Bupleuri	98	MOL000098	quercetin	Prostaglandin G/H synthase 2	94	290	validated	0.940132	0.82
Radix Bupleuri	98	MOL000098	quercetin	Heat shock protein HSP 90	444	1939		0.963059	0.722
Radix Bupleuri	98	MOL000098	quercetin	Phosphatidylinositol-4,5-bisphosphate 3-kinase catalytic subunit, gamma isoform	491	2404		0.928716	0.74
Radix Bupleuri	98	MOL000098	quercetin	Nuclear receptor coactivator 2	3276	6241		0.802254	0.788
Radix Bupleuri	98	MOL000098	quercetin	Dipeptidyl peptidase IV	332	952		0.868838	0.702
Radix Bupleuri	98	MOL000098	quercetin	Aldose reductase	288	822		0.889035	0.712
Radix Bupleuri	98	MOL000098	quercetin	Trypsin-1	2928	3176		0.87955	0.796
Radix Bupleuri	98	MOL000098	quercetin	DNA topoisomerase II	287	817		0.84204	0.714
Radix Bupleuri	98	MOL000098	quercetin	Thrombin	17	54		0.935714	0.806
Radix Bupleuri	98	MOL000098	quercetin	Potassium voltage-gated channel subfamily H member 2	37	101		0.859815	0.702
Radix Bupleuri	98	MOL000098	quercetin	Sodium channel protein type 5 subunit alpha	70	220		0.821585	0.714
Radix Bupleuri	98	MOL000098	quercetin	Coagulation factor Xa	79	239		0.837799	0.708
Radix Bupleuri	98	MOL000098	quercetin	Beta-2 adrenergic receptor	261	766		0.864494	0.708
Radix Bupleuri	98	MOL000098	quercetin	Stromelysin-1	441	1926		0.840368	0.712
Radix Bupleuri	98	MOL000098	quercetin	mRNA of PKA Catalytic Subunit C-alpha	699	6263		0.812877	0.766
Radix Bupleuri	98	MOL000098	quercetin	Coagulation factor VII	123	369		0.801392	0.708
Radix Bupleuri	98	MOL000098	quercetin	Nitric-oxide synthase, endothelial	95	291		0.87242	0.754
Radix Bupleuri	98	MOL000098	quercetin	Retinoic acid receptor RXR-alpha	158	459		0.93284	0.704
Radix Bupleuri	98	MOL000098	quercetin	Acetylcholinesterase	165	474		0.87927	0.7
Radix Bupleuri	98	MOL000098	quercetin	Gamma-aminobutyric acid receptor subunit alpha-1	309	872		0.913357	0.706
Radix Bupleuri	98	MOL000098	quercetin	Amine oxidase [flavin-containing] B	565	3939		0.801801	0.706
Radix Bupleuri	98	MOL000098	quercetin	Transcription factor p65	4565	h001	validated	null	null
Radix Bupleuri	98	MOL000098	quercetin	Epidermal growth factor receptor	298	844	validated	null	null
Radix Bupleuri	98	MOL000098	quercetin	RAC-alpha serine/threonine-protein kinase	4490	h001	validated	null	null
Radix Bupleuri	98	MOL000098	quercetin	Vascular endothelial growth factor A	740	183	validated	null	null
Radix Bupleuri	98	MOL000098	quercetin	G1/S-specific cyclin-D1	4214	h001	validated	null	null
Radix Bupleuri	98	MOL000098	quercetin	Apoptosis regulator Bcl-2	86	273	validated	null	null
Radix Bupleuri	98	MOL000098	quercetin	Bcl-2-like protein 1	4054	h001	validated	null	null
Radix Bupleuri	98	MOL000098	quercetin	Proto-oncogene c-Fos	4478	h001	validated	null	null
Radix Bupleuri	98	MOL000098	quercetin	Cyclin-dependent kinase inhibitor 1	4141	h001	validated	null	null
Radix Bupleuri	98	MOL000098	quercetin	Eukaryotic translation initiation factor 6	4197	h001	validated	null	null
Radix Bupleuri	98	MOL000098	quercetin	Apoptosis regulator BAX	4033	h001	validated	null	null
Radix Bupleuri	98	MOL000098	quercetin	Caspase-9	4090	h001	validated	null	null
Radix Bupleuri	98	MOL000098	quercetin	Urokinase-type plasminogen activator	346	1074	validated	null	null
Radix Bupleuri	98	MOL000098	quercetin	72 kDa type IV collagenase	238	707	validated	null	null
Radix Bupleuri	98	MOL000098	quercetin	Matrix metalloproteinase-9	4334	h001	validated	null	null
Radix Bupleuri	98	MOL000098	quercetin	Mitogen-activated protein kinase 1	354	1176	validated	null	null
Radix Bupleuri	98	MOL000098	quercetin	Interleukin-10	4292	h001	validated	null	null
Radix Bupleuri	98	MOL000098	quercetin	Pro-epidermal growth factor	734	1278	validated	null	null
Radix Bupleuri	98	MOL000098	quercetin	Retinoblastoma-associated protein	2915	3846	validated	null	null
Radix Bupleuri	98	MOL000098	quercetin	Tumor necrosis factor	265	777	validated	null	null
Radix Bupleuri	98	MOL000098	quercetin	Transcription factor AP-1	414	1629	validated	null	null
Radix Bupleuri	98	MOL000098	quercetin	Interleukin-6	351	1159	validated	null	null
Radix Bupleuri	98	MOL000098	quercetin	Cyclin-dependent kinase inhibitor 2A, isoforms 1/2/3	4144	h001	validated	null	null
Radix Bupleuri	98	MOL000098	quercetin	Activator of 90 kDa heat shock protein ATPase homolog 1	4007	h001	validated	null	null
Radix Bupleuri	98	MOL000098	quercetin	Caspase-3	4087	h001	validated	null	null
Radix Bupleuri	98	MOL000098	quercetin	Cellular tumor antigen p53	646	5788	validated	null	null
Radix Bupleuri	98	MOL000098	quercetin	ETS domain-containing protein Elk-1	4194	h001	validated	null	null
Radix Bupleuri	98	MOL000098	quercetin	NF-kappa-B inhibitor alpha	4394	h001	validated	null	null
Radix Bupleuri	98	MOL000098	quercetin	NADPH--cytochrome P450 reductase	744	4120	validated	null	null
Radix Bupleuri	98	MOL000098	quercetin	Ornithine decarboxylase	153	449	validated	null	null
Radix Bupleuri	98	MOL000098	quercetin	Xanthine dehydrogenase/oxidase	568	3947	validated	null	null
Radix Bupleuri	98	MOL000098	quercetin	Caspase-8	4089	h001	validated	null	null
Radix Bupleuri	98	MOL000098	quercetin	DNA topoisomerase 1	1293	3552	validated	null	null
Radix Bupleuri	98	MOL000098	quercetin	RAF proto-oncogene serine/threonine-protein kinase	4491	h001	validated	null	null
Radix Bupleuri	98	MOL000098	quercetin	Superoxide dismutase [Cu-Zn]	597	4152	validated	null	null
Radix Bupleuri	98	MOL000098	quercetin	Protein kinase C alpha type	4469	h001	validated	null	null
Radix Bupleuri	98	MOL000098	quercetin	Interstitial collagenase	353	1167	validated	null	null
Radix Bupleuri	98	MOL000098	quercetin	Hypoxia-inducible factor 1-alpha	4263	h001	validated	null	null
Radix Bupleuri	98	MOL000098	quercetin	Signal transducer and activator of transcription 1-alpha/beta	4525	h001	validated	null	null
Radix Bupleuri	98	MOL000098	quercetin	Protein CBFA2T1	4464	h001	validated	null	null
Radix Bupleuri	98	MOL000098	quercetin	Probable E3 ubiquitin-protein ligase HERC5	4441	h001	validated	null	null
Radix Bupleuri	98	MOL000098	quercetin	Cell division control protein 2 homolog	431	1771	validated	null	null
Radix Bupleuri	98	MOL000098	quercetin	78 kDa glucose-regulated protein	2963	1847	validated	null	null
Radix Bupleuri	98	MOL000098	quercetin	Receptor tyrosine-protein kinase erbB-2	4496	h001	validated	null	null
Radix Bupleuri	98	MOL000098	quercetin	Peroxisome proliferator-activated receptor gamma	4422	h001	validated	null	null
Radix Bupleuri	98	MOL000098	quercetin	Acetyl-CoA carboxylase 1	231	690	validated	null	null
Radix Bupleuri	98	MOL000098	quercetin	Heme oxygenase 1	2132	3391	validated	null	null
Radix Bupleuri	98	MOL000098	quercetin	Cytochrome P450 3A4	621	4512	validated	null	null
Radix Bupleuri	98	MOL000098	quercetin	Cytochrome P450 1A2	724	4200	validated	null	null
Radix Bupleuri	98	MOL000098	quercetin	Caveolin-1	4095	h001	validated	null	null
Radix Bupleuri	98	MOL000098	quercetin	Myc proto-oncogene protein	4372	h001	validated	null	null
Radix Bupleuri	98	MOL000098	quercetin	Tissue factor	466	2139	validated	null	null
Radix Bupleuri	98	MOL000098	quercetin	Gap junction alpha-1 protein	436	1827	validated	null	null
Radix Bupleuri	98	MOL000098	quercetin	Cytochrome P450 1A1	4149	h001	validated	null	null
Radix Bupleuri	98	MOL000098	quercetin	Intercellular adhesion molecule 1	4287	h001	validated	null	null
Radix Bupleuri	98	MOL000098	quercetin	Interleukin-1 beta	418	1654	validated	null	null
Radix Bupleuri	98	MOL000098	quercetin	C-C motif chemokine 2	417	1649	validated	null	null
Radix Bupleuri	98	MOL000098	quercetin	E-selectin	427	1756	validated	null	null
Radix Bupleuri	98	MOL000098	quercetin	Vascular cell adhesion protein 1	440	1908	validated	null	null
Radix Bupleuri	98	MOL000098	quercetin	Prostaglandin E2 receptor EP3 subtype	593	4131	validated	null	null
Radix Bupleuri	98	MOL000098	quercetin	Interleukin-8	4303	h001	validated	null	null
Radix Bupleuri	98	MOL000098	quercetin	Protein kinase C beta type	4470	h001	validated	null	null
Radix Bupleuri	98	MOL000098	quercetin	Baculoviral IAP repeat-containing protein 5	4044	h001	validated	null	null
Radix Bupleuri	98	MOL000098	quercetin	Dual oxidase 2	4174	h001	validated	null	null
Radix Bupleuri	98	MOL000098	quercetin	Nitric oxide synthase, endothelial	4395	h001	validated	null	null
Radix Bupleuri	98	MOL000098	quercetin	Heat shock protein beta-1	4247	h001	validated	null	null
Radix Bupleuri	98	MOL000098	quercetin	Transforming growth factor beta-1	4568	h001	validated	null	null
Radix Bupleuri	98	MOL000098	quercetin	Estrogen sulfotransferase	781	1275	validated	null	null
Radix Bupleuri	98	MOL000098	quercetin	Maltase-glucoamylase, intestinal	318	929	validated	null	null
Radix Bupleuri	98	MOL000098	quercetin	Interleukin-2	3978	1575	validated	null	null
Radix Bupleuri	98	MOL000098	quercetin	Nuclear receptor subfamily 1 group I member 2	4403	h001	validated	null	null
Radix Bupleuri	98	MOL000098	quercetin	Cytochrome P450 1B1	4150	h001	validated	null	null
Radix Bupleuri	98	MOL000098	quercetin	G2/mitotic-specific cyclin-B1	4219	h001	validated	null	null
Radix Bupleuri	98	MOL000098	quercetin	Tissue-type plasminogen activator	434	1792	validated	null	null
Radix Bupleuri	98	MOL000098	quercetin	Thrombomodulin	457	2021	validated	null	null
Radix Bupleuri	98	MOL000098	quercetin	Plasminogen activator inhibitor 1	4429	h001	validated	null	null
Radix Bupleuri	98	MOL000098	quercetin	Collagen alpha-1(I) chain	731	28	validated	null	null
Radix Bupleuri	98	MOL000098	quercetin	Interferon gamma	365	1253	validated	null	null
Radix Bupleuri	98	MOL000098	quercetin	Arachidonate 5-lipoxygenase	88	275	validated	null	null
Radix Bupleuri	98	MOL000098	quercetin	Phosphatidylinositol-3,4,5-trisphosphate 3-phosphatase and dual-specificity protein phosphatase PTEN	4620	h001	validated	null	null
Radix Bupleuri	98	MOL000098	quercetin	Interleukin-1 alpha	4297	h001	validated	null	null
Radix Bupleuri	98	MOL000098	quercetin	Myeloperoxidase	428	1757	validated	null	null
Radix Bupleuri	98	MOL000098	quercetin	DNA topoisomerase 2-alpha	4172	h001	validated	null	null
Radix Bupleuri	98	MOL000098	quercetin	Neutrophil cytosol factor 1	4391	h001	validated	null	null
Radix Bupleuri	98	MOL000098	quercetin	ATP-binding cassette sub-family G member 2	4038	h001	validated	null	null
Radix Bupleuri	98	MOL000098	quercetin	Hyaluronan synthase 2	4262	h001	validated	null	null
Radix Bupleuri	98	MOL000098	quercetin	Glutathione S-transferase P	733	904	validated	null	null
Radix Bupleuri	98	MOL000098	quercetin	Nuclear factor erythroid 2-related factor 2	4398	h001	validated	null	null
Radix Bupleuri	98	MOL000098	quercetin	NAD(P)H dehydrogenase [quinone] 1	470	2157	validated	null	null
Radix Bupleuri	98	MOL000098	quercetin	Poly [ADP-ribose] polymerase 1	4435	h001	validated	null	null
Radix Bupleuri	98	MOL000098	quercetin	Aryl hydrocarbon receptor	3204	6220	validated	null	null
Radix Bupleuri	98	MOL000098	quercetin	26S proteasome non-ATPase regulatory subunit 3	3993	h001	validated	null	null
Radix Bupleuri	98	MOL000098	quercetin	Solute carrier family 2, facilitated glucose transporter member 4	4535	h001	validated	null	null
Radix Bupleuri	98	MOL000098	quercetin	Collagen alpha-1(III) chain	2885	3853	validated	null	null
Radix Bupleuri	98	MOL000098	quercetin	DNA gyrase subunit B	1366	4150	validated	null	null
Radix Bupleuri	98	MOL000098	quercetin	C-X-C motif chemokine 11	4137	h001	validated	null	null
Radix Bupleuri	98	MOL000098	quercetin	C-X-C motif chemokine 2	4138	h001	validated	null	null
Radix Bupleuri	98	MOL000098	quercetin	DDB1- and CUL4-associated factor 5	4159	h001	validated	null	null
Radix Bupleuri	98	MOL000098	quercetin	Nuclear receptor subfamily 1 group I member 3	4404	h001	validated	null	null
Radix Bupleuri	98	MOL000098	quercetin	Serine/threonine-protein kinase Chk2	4513	h001	validated	null	null
Radix Bupleuri	98	MOL000098	quercetin	Insulin receptor	11	36	validated	null	null
Radix Bupleuri	98	MOL000098	quercetin	Claudin-4	4125	h001	validated	null	null
Radix Bupleuri	98	MOL000098	quercetin	Peroxisome proliferator-activated receptor alpha	4420	h001	validated	null	null
Radix Bupleuri	98	MOL000098	quercetin	Peroxisome proliferator-activated receptor delta	4421	h001	validated	null	null
Radix Bupleuri	98	MOL000098	quercetin	Heat shock factor protein 1	4246	h001	validated	null	null
Radix Bupleuri	98	MOL000098	quercetin	C-reactive protein	4130	h001	validated	null	null
Radix Bupleuri	98	MOL000098	quercetin	C-X-C motif chemokine 10	4136	h001	validated	null	null
Radix Bupleuri	98	MOL000098	quercetin	Inhibitor of nuclear factor kappa-B kinase subunit alpha	4270	h001	validated	null	null
Radix Bupleuri	98	MOL000098	quercetin	Osteopontin	4411	h001	validated	null	null
Radix Bupleuri	98	MOL000098	quercetin	Runt-related transcription factor 2	4505	h001	validated	null	null
Radix Bupleuri	98	MOL000098	quercetin	Ras association domain-containing protein 1	4492	h001	validated	null	null
Radix Bupleuri	98	MOL000098	quercetin	Transcription factor E2F1	4560	h001	validated	null	null
Radix Bupleuri	98	MOL000098	quercetin	Transcription factor E2F2	4561	h001	validated	null	null
Radix Bupleuri	98	MOL000098	quercetin	Prostatic acid phosphatase	2998	1859	validated	null	null
Radix Bupleuri	98	MOL000098	quercetin	Cathepsin D	363	1243	validated	null	null
Radix Bupleuri	98	MOL000098	quercetin	Insulin-like growth factor-binding protein 3	4276	h001	validated	null	null
Radix Bupleuri	98	MOL000098	quercetin	Insulin-like growth factor II	4279	h001	validated	null	null
Radix Bupleuri	98	MOL000098	quercetin	CD40 ligand	4107	h001	validated	null	null
Radix Bupleuri	98	MOL000098	quercetin	Interferon regulatory factor 1	4290	h001	validated	null	null
Radix Bupleuri	98	MOL000098	quercetin	Receptor tyrosine-protein kinase erbB-3	4497	h001	validated	null	null
Radix Bupleuri	98	MOL000098	quercetin	Serum paraoxonase/arylesterase 1	357	1198	validated	null	null
Radix Bupleuri	98	MOL000098	quercetin	Type I iodothyronine deiodinase	4589	h001	validated	null	null
Radix Bupleuri	98	MOL000098	quercetin	Procollagen C-endopeptidase enhancer 1	4443	h001	validated	null	null
Radix Bupleuri	98	MOL000098	quercetin	Puromycin-sensitive aminopeptidase	4484	h001	validated	null	null
Radix Bupleuri	98	MOL000098	quercetin	Hexokinase-2	4252	h001	validated	null	null
Radix Bupleuri	98	MOL000098	quercetin	Homeobox protein Nkx-3.1	4259	h001	validated	null	null
Radix Bupleuri	98	MOL000098	quercetin	Ras GTPase-activating protein 1	4493	h001	validated	null	null
Radix Bupleuri	98	MOL000098	quercetin	Peroxidase C1A	4418	h001	validated	null	null
Radix Bupleuri	98	MOL000098	quercetin	Glutathione S-transferase Mu 1	2952	896	validated	null	null
Radix Bupleuri	98	MOL000098	quercetin	Glutathione S-transferase Mu 2	3688	2165	validated	null	null
Radix Bupleuri	116	MOL000116	Nonanal	Alcohol dehydrogenase 1B	726	444		0.87665	0.746
Radix Bupleuri	116	MOL000116	Nonanal	Alcohol dehydrogenase 1C	727	517		0.912223	0.74
Radix Bupleuri	116	MOL000116	Nonanal	Gamma-aminobutyric-acid receptor alpha-2 subunit	141	423		0.972663	0.706
Radix Bupleuri	116	MOL000116	Nonanal	Gamma-aminobutyric acid receptor subunit alpha-1	309	872		0.927279	0.706
Radix Bupleuri	116	MOL000116	Nonanal	Cytochrome P450-cam	1143	2298		0.903211	0.808
Radix Bupleuri	121	MOL000121	Decanal	Alcohol dehydrogenase 1B	726	444		0.861349	0.708
Radix Bupleuri	121	MOL000121	Decanal	Alcohol dehydrogenase 1C	727	517		0.904081	0.714
Radix Bupleuri	125	MOL000125	(-)-alpha-Pinene	Gamma-aminobutyric-acid receptor alpha-2 subunit	141	423		0.97691	0.706
Radix Bupleuri	125	MOL000125	(-)-alpha-Pinene	Gamma-aminobutyric acid receptor subunit alpha-1	309	872		0.93792	0.704
Radix Bupleuri	125	MOL000125	(-)-alpha-Pinene	Cytochrome P450-cam	1143	2298		0.92748	0.826
Radix Bupleuri	172	MOL000172	Furol	Alcohol dehydrogenase 1B	726	444		0.84816	0.722
Radix Bupleuri	172	MOL000172	Furol	Alcohol dehydrogenase 1C	727	517		0.86014	0.77
Radix Bupleuri	172	MOL000172	Furol	Alcohol dehydrogenase 1A	729	251		0.83765	0.71
Radix Bupleuri	172	MOL000172	Furol	Lysozyme	1172	2300		0.81981	0.72
Radix Bupleuri	172	MOL000172	Furol	Nicotinate-nucleotide--dimethylbenzimidazole phosphoribosyltransferase	2262	2264		0.82224	0.758
Radix Bupleuri	263	MOL000263	oleanolic acid	Caspase-9	4090	h001	validated	null	null
Radix Bupleuri	263	MOL000263	oleanolic acid	Caspase-3	4087	h001	validated	null	null
Radix Bupleuri	263	MOL000263	oleanolic acid	Heme oxygenase 1	2132	3391	validated	null	null
Radix Bupleuri	263	MOL000263	oleanolic acid	Intercellular adhesion molecule 1	4287	h001	validated	null	null
Radix Bupleuri	263	MOL000263	oleanolic acid	NAD(P)H dehydrogenase [quinone] 1	470	2157	validated	null	null
Radix Bupleuri	263	MOL000263	oleanolic acid	Pancreatic alpha-amylase	622	4513	validated	null	null
Radix Bupleuri	474	MOL000474	(-)-Epoxycaryophyllene	Muscarinic acetylcholine receptor M3	16	51		0.89887	0.738
Radix Bupleuri	474	MOL000474	(-)-Epoxycaryophyllene	Thrombin	17	54		0.895331	0.722
Radix Bupleuri	474	MOL000474	(-)-Epoxycaryophyllene	Muscarinic acetylcholine receptor M1	38	103		0.900819	0.73
Radix Bupleuri	474	MOL000474	(-)-Epoxycaryophyllene	Prostaglandin G/H synthase 2	94	290		0.826095	0.702
Radix Bupleuri	474	MOL000474	(-)-Epoxycaryophyllene	Acetylcholinesterase	165	474		0.897179	0.752
Radix Bupleuri	474	MOL000474	(-)-Epoxycaryophyllene	Muscarinic acetylcholine receptor M2	210	617		0.919878	0.756
Radix Bupleuri	474	MOL000474	(-)-Epoxycaryophyllene	Alpha-1B adrenergic receptor	216	632		0.810011	0.75
Radix Bupleuri	474	MOL000474	(-)-Epoxycaryophyllene	Gamma-aminobutyric acid receptor subunit alpha-1	309	872		0.945901	0.722
Radix Bupleuri	474	MOL000474	(-)-Epoxycaryophyllene	Dipeptidyl peptidase IV	332	952		0.904865	0.724
Radix Bupleuri	474	MOL000474	(-)-Epoxycaryophyllene	Gamma-aminobutyric-acid receptor subunit alpha-6	3284	841		0.920058	0.702
Radix Bupleuri	601	MOL000601	O-Methylthymol	Muscarinic acetylcholine receptor M3	16	51		0.928936	0.71
Radix Bupleuri	601	MOL000601	O-Methylthymol	Muscarinic acetylcholine receptor M1	38	103		0.950139	0.722
Radix Bupleuri	601	MOL000601	O-Methylthymol	Beta-1 adrenergic receptor	63	193		0.880857	0.722
Radix Bupleuri	601	MOL000601	O-Methylthymol	Sodium channel protein type 5 subunit alpha	70	220		0.844536	0.71
Radix Bupleuri	601	MOL000601	O-Methylthymol	Alpha-2C adrenergic receptor	126	378		0.896777	0.714
Radix Bupleuri	601	MOL000601	O-Methylthymol	Sodium-dependent noradrenaline transporter	186	540		0.919266	0.73
Radix Bupleuri	601	MOL000601	O-Methylthymol	Alpha-1A adrenergic receptor	191	556		0.896579	0.734
Radix Bupleuri	601	MOL000601	O-Methylthymol	Muscarinic acetylcholine receptor M2	210	617		0.944926	0.702
Radix Bupleuri	601	MOL000601	O-Methylthymol	Alpha-1B adrenergic receptor	216	632		0.922899	0.71
Radix Bupleuri	601	MOL000601	O-Methylthymol	Beta-2 adrenergic receptor	261	766		0.895992	0.718
Radix Bupleuri	601	MOL000601	O-Methylthymol	Alpha-1D adrenergic receptor	272	789		0.856451	0.7
Radix Bupleuri	601	MOL000601	O-Methylthymol	Alpha-2B adrenergic receptor	214	629		0.939077	0.712
Radix Bupleuri	601	MOL000601	O-Methylthymol	Sodium-dependent dopamine transporter	239	713		0.891666	0.712
Radix Bupleuri	608	MOL000608	()-Terpinen-4-ol	Muscarinic acetylcholine receptor M3	16	51		0.92877	0.71
Radix Bupleuri	608	MOL000608	()-Terpinen-4-ol	Muscarinic acetylcholine receptor M1	38	103		0.93241	0.724
Radix Bupleuri	608	MOL000608	()-Terpinen-4-ol	Gamma-aminobutyric-acid receptor alpha-2 subunit	141	423		0.97985	0.724
Radix Bupleuri	608	MOL000608	()-Terpinen-4-ol	Gamma-aminobutyric-acid receptor alpha-5 subunit	181	523		0.97046	0.71
Radix Bupleuri	608	MOL000608	()-Terpinen-4-ol	Gamma-aminobutyric-acid receptor alpha-3 subunit	200	580		0.94747	0.728
Radix Bupleuri	608	MOL000608	()-Terpinen-4-ol	Muscarinic acetylcholine receptor M2	210	617		0.92768	0.73
Radix Bupleuri	608	MOL000608	()-Terpinen-4-ol	Gamma-aminobutyric acid receptor subunit alpha-1	309	872		0.94711	0.76
Radix Bupleuri	608	MOL000608	()-Terpinen-4-ol	Cytochrome P450-cam	1143	2298		0.85579	0.7
Radix Bupleuri	608	MOL000608	()-Terpinen-4-ol	Ig gamma-1 chain C region	1201	4785		0.9589	0.716
Radix Bupleuri	608	MOL000608	()-Terpinen-4-ol	Alpha-1B adrenergic receptor	216	632		0.886811	0.7
Radix Bupleuri	608	MOL000608	()-Terpinen-4-ol	Sodium-dependent noradrenaline transporter	186	540		0.932907	0.702
Radix Bupleuri	608	MOL000608	()-Terpinen-4-ol	Neuronal acetylcholine receptor subunit alpha-2	284	813		0.912564	0.702
Radix Bupleuri	608	MOL000608	()-Terpinen-4-ol	Gamma-aminobutyric-acid receptor subunit alpha-6	3284	841		0.955867	0.7
Radix Bupleuri	615	MOL000615	delta-amorphene	Prostaglandin G/H synthase 2	94	290		0.82964	0.71
Radix Bupleuri	615	MOL000615	delta-amorphene	Gamma-aminobutyric acid receptor subunit alpha-1	309	872		0.952981	0.706
Radix Bupleuri	615	MOL000615	delta-amorphene	Cytochrome P450-cam	1143	2298		0.858784	0.738
Radix Bupleuri	615	MOL000615	delta-amorphene	Prostaglandin G/H synthase 1	6	20		0.92271	0.716
Radix Bupleuri	615	MOL000615	delta-amorphene	Muscarinic acetylcholine receptor M1	38	103		0.94815	0.7
Radix Bupleuri	615	MOL000615	delta-amorphene	Retinoic acid receptor RXR-alpha	158	459		0.90595	0.702
Radix Bupleuri	615	MOL000615	delta-amorphene	Sodium-dependent noradrenaline transporter	186	540		0.93229	0.728
Radix Bupleuri	615	MOL000615	delta-amorphene	Amine oxidase [flavin-containing] B	565	3939		0.82474	0.702
Radix Bupleuri	615	MOL000615	delta-amorphene	Nuclear receptor coactivator 2	3276	6241		0.85857	0.724
Radix Bupleuri	703	MOL000703	2-heptanone	Arachidonate 5-lipoxygenase	88	275	validated	null	null
Radix Bupleuri	709	MOL000709	(S)-Matsutake alcohol	Alcohol dehydrogenase 1C	727	517		0.84159	0.752
[truncated: 3,231 more rows]
