# Supplementary material for: Uncovering the Pharmacological Mechanism of Chaibei Zhixian Decoction on Epilepsy by Network Pharmacology Analysis
Source: Evid Based Complement Alternat Med. 2019 May 12;2019:3104741. doi: 10.1155/2019/3104741 (PMC6535852; doi:10.1155/2019/3104741)
Supplement: Supplementary 2 — Supplemental Table 2: nonrepetitive 941 protein targets from the TCMSP database. [file 3104741.f2.xlsx]

## Sheet: Sheet1
target_name
Gamma-aminobutyric-acid receptor alpha-2 subunit
Gamma-aminobutyric acid receptor subunit alpha-1
Cytochrome P450-cam
Progesterone receptor
Nuclear receptor coactivator 2
Sodium-dependent noradrenaline transporter
Lysozyme
Muscarinic acetylcholine receptor M3
Muscarinic acetylcholine receptor M1
Muscarinic acetylcholine receptor M2
Alpha-1B adrenergic receptor
Neuronal acetylcholine receptor subunit alpha-2
Dopamine D1 receptor
Beta-1 adrenergic receptor
Retinoic acid receptor RXR-alpha
5-hydroxytryptamine 2A receptor
Alpha-1A adrenergic receptor
Gamma-aminobutyric-acid receptor alpha-3 subunit
Sodium-dependent dopamine transporter
Beta-2 adrenergic receptor
Neuronal acetylcholine receptor protein, alpha-7 chain
Gamma-aminobutyric-acid receptor alpha-5 subunit
Gamma-aminobutyric-acid receptor subunit alpha-6
Prostaglandin G/H synthase 1
Sodium channel protein type 5 subunit alpha
Coagulation factor Xa
Prostaglandin G/H synthase 2
DNA topoisomerase II
Heat shock protein HSP 90
Calcium-activated potassium channel subunit alpha 1
Ig gamma-1 chain C region
Alcohol dehydrogenase 1B
Alcohol dehydrogenase 1C
Nitric-oxide synthase, endothelial
Proline dehydrogenase, mitochondrial
G1/S-specific cyclin-D1
Mitogen-activated protein kinase 3
Cell division protein kinase 4
Bcl-2 homologous antagonist/killer
Probable E3 ubiquitin-protein ligase HERC5
Protein kinase C beta type
3-hydroxy-3-methylglutaryl-coenzyme A reductase
Cytochrome P450 2B6
Sucrase-isomaltase, intestinal
Lactase-phlorizin hydrolase
Alpha-2C adrenergic receptor
Amine oxidase [flavin-containing] A
Nicotinate-nucleotide--dimethylbenzimidazole phosphoribosyltransferase
Transient receptor potential cation channel subfamily V member 1
Cholinesterase
Phospholipase A2
Rhinovirus coat protein
Ferrichrome-iron receptor
3-oxoacyl-[acyl-carrier-protein] synthase 1
Nuclear receptor coactivator 1
Phosphatidylcholine-sterol acyltransferase
Rhodopsin
Trypsin-3
Amine oxidase [flavin-containing] B
CGMP-inhibited 3',5'-cyclic phosphodiesterase A
Sodium-dependent serotonin transporter
Nitric-oxide synthase, brain
Glutamate [NMDA] receptor subunit epsilon 1
Glycogen phosphorylase, muscle form
Cathepsin D
Pancreatic alpha-amylase
Beta-galactosidase
Ig gamma-2 chain C region
Neuraminidase
Cyclomaltodextrin glucanotransferase
Mannosyl-oligosaccharide alpha-1,2-mannosidase
Endoglucanase F
Endoglucanase G
Bacillolysin
Mannan endo-1,4-beta-mannosidase
Chondroitinase AC
Prostatic acid phosphatase
Glutamate receptor 2
Endoplasmic reticulum mannosyl-oligosaccharide 1,2-alpha-mannosidase
Alpha-mannosidase 2
Beta-amylase
Hyaluronate lyase
BH0236 protein
Estrogen receptor
Peroxisome proliferator activated receptor gamma
Carbonic anhydrase II
Estrogen receptor beta
Mitogen-activated protein kinase 14
Glycogen synthase kinase-3 beta
Cell division protein kinase 2
mRNA of PKA Catalytic Subunit C-alpha
cAMP-dependent protein kinase inhibitor alpha
Nitric oxide synthase, inducible
Androgen receptor
Phosphatidylinositol-4,5-bisphosphate 3-kinase catalytic subunit, gamma isoform
Beta-lactamase
Proto-oncogene serine/threonine-protein kinase Pim-1
Cyclin-A2
Proto-oncogene c-Fos
Apoptosis regulator BAX
E-selectin
Vascular cell adhesion protein 1
Gamma-aminobutyric acid type B receptor subunit 1
Tyrosinase
Junctional adhesion molecule A
Tyrosine-protein kinase JAK2
Metallothionein-2
Solute carrier family 2, facilitated glucose transporter member 1
Potassium voltage-gated channel subfamily H member 2
Calmodulin
Gamma-aminobutyric-acid receptor subunit alpha-4
Alpha-2A adrenergic receptor
Vascular endothelial growth factor receptor 2
Thrombin
Leukotriene A-4 hydrolase
Transcription factor p65
NF-kappa-B inhibitor alpha
C-C motif chemokine 2
Interleukin-8
5,6-dihydroxyindole-2-carboxylic acid oxidase
L-dopachrome tautomerase
Acetylcholinesterase
Dipeptidyl peptidase IV
Alpha-1D adrenergic receptor
Neutrophil elastase
Inositol-3-phosphate synthase 1
Alpha-2B adrenergic receptor
Urokinase-type plasminogen activator
Glutathione S-transferase P
Glutathione reductase, mitochondrial
Chymotrypsinogen B
Thermolysin
Cytochrome P450 1A1
Cytochrome P450 1B1
Arachidonate 5-lipoxygenase
Aryl hydrocarbon receptor
Canalicular multispecific organic anion transporter 1
T-lymphocyte activation antigen CD86
Serine/threonine-protein phosphatase 2B catalytic subunit alpha isoform
Pepsin A
Mucin-1
Quinone oxidoreductase
Calcium-transporting ATPase type 2C member 1
Short transient receptor potential channel 3
Transient receptor potential cation channel subfamily V member 3
Ecto-NOX disulfide-thiol exchanger 2
RAC-alpha serine/threonine-protein kinase
Vascular endothelial growth factor A
Apoptosis regulator Bcl-2
Mitogen-activated protein kinase 1
Caspase-3
Interstitial collagenase
Transcription factor jun-B
Heme oxygenase 1
Cyclic AMP-responsive element-binding protein 1
Neuromodulin
Multidrug resistance protein 1
Nuclear factor erythroid 2-related factor 2
Glial fibrillary acidic protein
Proteinase-activated receptor 2
Erythroid transcription factor
Glutamine synthetase
Protransforming growth factor alpha
Prostate-specific antigen
Chymotrypsin-C
3 beta-hydroxysteroid dehydrogenase/Delta 5-->4-isomerase type 2
Ras-related C3 botulinum toxin substrate 1
Pro-opiomelanocortin
Mitochondrial brown fat uncoupling protein 1
Voltage-dependent T-type calcium channel subunit alpha-1H
Phosphoglycolate phosphatase
Hemoglobin subunit beta
Glycophorin-A
Transcription factor PU.1
Protachykinin-1
Substance-P receptor
Muscarinic acetylcholine receptor M4
Progonadoliberin-1
mRNA of Protein-tyrosine phosphatase, non-receptor type 1
Alcohol dehydrogenase 1A
2-hydroxy-6-oxo-7-methylocta-2,4-dienoate hydrolase
Glycine amidinotransferase, mitochondrial
Coagulation factor VII
Peroxisome proliferator activated receptor delta
Serine/threonine-protein kinase Chk1
Trypsin-1
Acyl-CoA thioesterase I precursor
Peroxisome proliferator-activated receptor alpha
Histone acetyltransferase p300
Fatty acid-binding protein, liver
Retinol-binding protein 2
Haloalkane dehalogenase
Interleukin-6
Dual oxidase 2
T-lymphocyte activation antigen CD80
Tumor necrosis factor receptor superfamily member 5
Mineralocorticoid receptor
Aldose reductase
Eukaryotic translation initiation factor 6
Transcription factor AP-1
RAF proto-oncogene serine/threonine-protein kinase
Myeloperoxidase
Ubiquitin carboxyl-terminal hydrolase isozyme L1
Peroxiredoxin-5, mitochondrial
RNA-binding protein FUS
Xanthine dehydrogenase/oxidase
Neutrophil cytosol factor 1
Oxidized low-density lipoprotein receptor 1
Cyclin-dependent kinase inhibitor 1
Retinoblastoma-associated protein
Stromelysin-1
Transcription factor E2F1
NRH dehydrogenase [quinone] 2
Carbonic anhydrase I
Queuine tRNA-ribosyltransferase
Inhibitor of nuclear factor kappa-B kinase subunit beta
Tumor necrosis factor
Activator of 90 kDa heat shock protein ATPase homolog 1
Mitogen-activated protein kinase 8
Signal transducer and activator of transcription 1-alpha/beta
Cell division control protein 2 homolog
Peroxisome proliferator-activated receptor gamma
Cytochrome P450 3A4
Cytochrome P450 1A2
Intercellular adhesion molecule 1
Nuclear receptor subfamily 1 group I member 2
Hyaluronan synthase 2
26S proteasome non-ATPase regulatory subunit 3
Solute carrier family 2, facilitated glucose transporter member 4
Nuclear receptor subfamily 1 group I member 3
Insulin receptor
Type I iodothyronine deiodinase
Peroxidase C1A
Glutathione S-transferase Mu 1
Glutathione S-transferase Mu 2
Aldo-keto reductase family 1 member C3
Antileukoproteinase
Gamma-glutamyltransferase 5
Glutamate--cysteine ligase catalytic subunit
Glutathione S-transferase A2
Aldo-keto reductase family 1 member C1
Antizyme inhibitor 1
Cytochrome P450 2A6
Renin, renal
Glucocorticoid receptor
5-hydroxytryptamine 2C receptor
Mu-type opioid receptor
Muscarinic acetylcholine receptor M5
Signal transducer and activator of transcription 3
Caspase-9
72 kDa type IV collagenase
Matrix metalloproteinase-9
Caspase-8
Bcl2 antagonist of cell death
Superoxide dismutase [Cu-Zn]
Protein kinase C alpha type
Metalloproteinase inhibitor 2
Hypoxia-inducible factor 1-alpha
Tumor necrosis factor receptor superfamily member 6
Mitogen-activated protein kinase 9
Baculoviral IAP repeat-containing protein 5
Nitric oxide synthase, endothelial
Tissue-type plasminogen activator
Cytochrome P450 19A1
Serine/threonine-protein kinase Chk2
P-selectin
Type-1 angiotensin II receptor
Interferon beta
Platelet-derived growth factor subunit A
Angiotensin-converting enzyme 2
Alanine aminotransferase 1
Tyrosine-protein kinase JAK3
Cyclin-dependent kinase inhibitor 1B
CDKN2A-interacting protein
Interferon alpha-1/13
Integrin beta-5
Leptin receptor
Perilipin-2
Proteinase-activated receptor 1
Cyclin-dependent kinase inhibitor 2A, isoforms 1/2/3
Myc proto-oncogene protein
NTF2-related export protein 1
Carbonic anhydrase IV
Fatty acid synthase
Bone morphogenetic protein 4
Lactotransferrin
Glycogen phosphorylase, liver form
NADPH--cytochrome P450 reductase
Catalase
Interleukin-1 beta
C5a anaphylatoxin chemotactic receptor
Insulin
Low affinity immunoglobulin epsilon Fc receptor
Integrin beta-2
Thromboxane A2 receptor
Tissue factor
Mitogen-activated protein kinase 10
Abl interactor 1
Platelet glycoprotein 4
Calponin-3
Telomerase protein component 1
Endothelin-1
Receptor tyrosine-protein kinase erbB-2
Lipoprotein lipase
Plasminogen activator inhibitor 1
Brain-derived neurotrophic factor
Peroxisome proliferator-activated receptor delta
C-reactive protein
Serum paraoxonase/arylesterase 1
Plasminogen
Glucagon
Glutamyl aminopeptidase
Mitochondrial uncoupling protein 2
Sterol O-acyltransferase 1
Cholecystokinin
Cbp/p300-interacting transactivator 1
BDNF/NT-3 growth factors receptor
Pancreas/duodenum homeobox protein 1
Solute carrier family 2, facilitated glucose transporter member 2
Peptidyl-glycine alpha-amidating monooxygenase
Acyl-CoA desaturase
Mitochondrial uncoupling protein 3
Cholesteryl ester transfer protein
Peptide YY
Aspartyl aminopeptidase
Cell-death-related nuclease 7
Interleukin-10
Collagen alpha-1(I) chain
Phosphatidylinositol-3,4,5-trisphosphate 3-phosphatase and dual-specificity protein phosphatase PTEN
Putative beta-glucuronidase-like protein SMA3
Solute carrier family 22 member 5
Choline-phosphate cytidylyltransferase A
Lithostathine-1-alpha
Membrane-associated guanylate kinase, WW and PDZ domain-containing protein 2
Transcription factor Sp1
Ectonucleotide pyrophosphatase/phosphodiesterase family member 7
5-hydroxytryptamine receptor 3A
Epidermal growth factor receptor
Bcl-2-like protein 1
Pro-epidermal growth factor
Cellular tumor antigen p53
ETS domain-containing protein Elk-1
Ornithine decarboxylase
DNA topoisomerase 1
Protein CBFA2T1
78 kDa glucose-regulated protein
Acetyl-CoA carboxylase 1
Caveolin-1
Gap junction alpha-1 protein
Prostaglandin E2 receptor EP3 subtype
Heat shock protein beta-1
Transforming growth factor beta-1
Estrogen sulfotransferase
Maltase-glucoamylase, intestinal
Interleukin-2
G2/mitotic-specific cyclin-B1
Thrombomodulin
Interferon gamma
Interleukin-1 alpha
DNA topoisomerase 2-alpha
ATP-binding cassette sub-family G member 2
NAD(P)H dehydrogenase [quinone] 1
Poly [ADP-ribose] polymerase 1
Collagen alpha-1(III) chain
DNA gyrase subunit B
C-X-C motif chemokine 11
C-X-C motif chemokine 2
DDB1- and CUL4-associated factor 5
Claudin-4
Heat shock factor protein 1
C-X-C motif chemokine 10
Inhibitor of nuclear factor kappa-B kinase subunit alpha
Osteopontin
Runt-related transcription factor 2
Ras association domain-containing protein 1
Transcription factor E2F2
Insulin-like growth factor-binding protein 3
Insulin-like growth factor II
CD40 ligand
Interferon regulatory factor 1
Receptor tyrosine-protein kinase erbB-3
Procollagen C-endopeptidase enhancer 1
Puromycin-sensitive aminopeptidase
Hexokinase-2
Homeobox protein Nkx-3.1
Ras GTPase-activating protein 1
4-aminobutyrate aminotransferase, mitochondrial
Glycine receptor alpha-1 chain
Proto-oncogene tyrosine-protein kinase SRC
Aspartate aminotransferase
Histidinol dehydrogenase
Formate acetyltransferase 1
Adenylosuccinate synthetase
Beta-lactamase SHV-2 precursor
Beta-lactamase SHV-1 precursor
Beta-lactamase SHV-1
C4-dicarboxylate transport transcriptional regulatory protein dctD
D-alanyl-D-alanine carboxypeptidase
A/G-specific adenine glycosylase
Monomeric sarcosine oxidase
Dihydroxyacetone kinase
1-aminocyclopropane-1-carboxylate deaminase
Serine--pyruvate aminotransferase
Alanine--glyoxylate aminotransferase 2, mitochondrial
Group IIE secretory phospholipase A2
ADP-ribosylation factor 1
NAD-dependent malic enzyme, mitochondrial
Gephyrin
Alanine racemase
Glucose--fructose oxidoreductase
Triosephosphate isomerase
Histidine decarboxylase
S-adenosylmethionine decarboxylase proenzyme
Aldehyde dehydrogenase, mitochondrial
Succinate semialdehyde dehydrogenase, mitochondrial
Estradiol 17 beta-dehydrogenase 1
Plasminogen activator inhibitor-1
Purine nucleoside phosphorylase
Pyridoxal phosphate phosphatase
Serine hydroxymethyltransferase, mitochondrial
DNA polymerase (HSV)
Cystathionine beta-synthase
Glutamate [NMDA] receptor subunit zeta-1
Kynureninase
Ornithine aminotransferase, mitochondrial
Glutamate--cysteine ligase regulatory subunit
Branched chain amino acid-dependent aminotransferase
Arginase II, mitochondrial
Cathepsin B
Alpha-1-antitrypsin
Inositol-1(or 4)-monophosphatase
Beta-catenin
Tumor necrosis factor ligand superfamily member 13B
Peptidyl-prolyl cis-trans isomerase A
mRNA of H-ras
Inhibitor of nuclear factor kappa B kinase beta subunit
Neutrophil collagenase
Macrophage metalloelastase
Triosephosphate isomerase (bacterial)
NH(3)-dependent NAD(+) synthetase
Dihydroorotase
UDP-glucose 4-epimerase
Methionine aminopeptidase 2
Phospholipase A2, membrane associated
Adenosylhomocysteinase
M-phase inducer phosphatase 2
Thioredoxin reductase, cytoplasmic
Elastase 1
Retinal dehydrogenase 1
Arginase-1
Carbonyl reductase [NADPH] 1
Glycine dehydrogenase [decarboxylating], mitochondrial
Ribonucleoside-diphosphate reductase large subunit
Dihydroorotate dehydrogenase, mitochondrial
Glutathione S-transferase A1
Alcohol dehydrogenase class 4 mu/sigma chain
Maleylacetoacetate isomerase
Carboxylesterase 2
Streptavidin
Riboflavin synthase alpha chain
6-phosphofructo-2-kinase/fructose-2,6-biphosphatase 4
Holliday junction ATP-dependent DNA helicase ruvB
Probable chorismate mutase
NADPH-ferredoxin reductase fprA
Citrate lyase beta subunit-like protein
Formyl-coenzyme A transferase
Sigma factor sigB regulation protein rsbQ
Phosphoribosylformylglycinamidine synthase
Phosphonoacetaldehyde hydrolase
Non-heme chloroperoxidase
Glutaminase 1
Glycine oxidase
Probable polysaccharide deacetylase pdaA
Glucosamine-6-phosphate deaminase 1
Endoxylanase
4-chlorobenzoyl CoA dehalogenase
6-phosphofructokinase
Subtilisin Carlsberg
Subtilisin BPN'
Tryptophanyl-tRNA synthetase
Methionyl-tRNA synthetase
Protein ninB
Bacterial hemoglobin
Ornithine carbamoyltransferase chain I
Meso-diaminopimelate D-dehydrogenase
Fumarate hydratase class II
DNA-3-methyladenine glycosylase 1
2,5-diketo-D-gluconic acid reductase A
Pyruvate decarboxylase
Glutathione reductase
Histidinol-phosphate aminotransferase
Pyruvate dehydrogenase [cytochrome]
Acetyl-CoA acetyltransferase
Benzoate 1,2-dioxygenase electron transfer component
Catechol 1,2-dioxygenase
Arsenical pump-driving ATPase
Galactose-1-phosphate uridylyltransferase
Carboxymethylenebutenolidase
Beta-lactamase OXA-2
Glycogen synthase 1
Parathion hydrolase
Cytochrome P450 121
3-oxoacyl-[acyl-carrier-protein] synthase 3
Cyclopropane-fatty-acyl-phospholipid synthase 2
Pantoate--beta-alanine ligase
Quinate/shikimate dehydrogenase
N-acetylneuraminate lyase
Thiosulfate sulfurtransferase glpE
Dihydroorotate dehydrogenase
UPF0189 protein ymdB
Arabinose operon regulatory protein
Ribokinase
Fructose-bisphosphate aldolase class 2
Phospho-2-dehydro-3-deoxyheptonate aldolase, Phe-sensitive
ATP-dependent Clp protease ATP-binding subunit clpA
Succinate dehydrogenase flavoprotein subunit
Fumarate reductase iron-sulfur subunit
Glucarate dehydratase
Glucose-6-phosphate 1-dehydrogenase
GDP-mannose 6-dehydrogenase
Gag-Pol polyprotein
Uridine phosphorylase
Adenosylmethionine-8-amino-7-oxononanoate aminotransferase
Carboxylesterase bioH
Methionine synthase
NADP-dependent alcohol dehydrogenase
L-lactate dehydrogenase
Putative ketoacyl reductase
2,2-dialkylglycine decarboxylase
Glyceraldehyde-3-phosphate dehydrogenase
Deacetoxycephalosporin C synthetase
L(+)-mandelate dehydrogenase
4-aminobutyrate aminotransferase
Esterase
Glyceraldehyde-3-phosphate dehydrogenase, glycosomal
Sensor protein fixL
Indole-3-pyruvate decarboxylase
Ecotin
Cytosine deaminase
Lactaldehyde dehydrogenase
Siroheme synthase
Orotidine 5'-phosphate decarboxylase
dTDP-4-dehydrorhamnose reductase
Aliphatic amidase expression-regulating protein
Acetolactate synthase, catabolic
3-ketoacyl-CoA thiolase
O-succinylbenzoate synthase
Alpha,alpha-trehalose-phosphate synthase [UDP-forming]
Rhamnulose-1-phosphate aldolase
L-rhamnose isomerase
Molybdopterin-guanine dinucleotide biosynthesis protein A
Diphtheria toxin repressor
Phosphoribosylglycinamide formyltransferase 2
UPF0124 protein yfiH
HTH-type transcriptional regulator treR
Alpha-ketoglutarate-dependent taurine dioxygenase
2,3-diketo-L-gulonate reductase
Proclavaminate amidinohydrolase
Oxygen-insensitive NAD(P)H nitroreductase
Isoaspartyl dipeptidase
FMN-dependent NADH-azoreductase
Nitrogen regulation protein NR(I)
Aspartate-semialdehyde dehydrogenase
Xanthosine phosphorylase
1-deoxy-D-xylulose 5-phosphate reductoisomerase
RNA 3'-terminal phosphate cyclase
Biphenyl-2,3-diol 1,2-dioxygenase
Triosephosphate isomerase, glycosomal
Multidrug resistance protein mexA
Probable pyruvate-flavodoxin oxidoreductase
Beta-lactamase IMP-1
Arginase
Ribonuclease Z
N-carbamoyl-D-amino acid hydrolase
Histidyl-tRNA synthetase
UDP-N-acetylenolpyruvoylglucosamine reductase
Beta-lactamase TEM
Probable L-lysine-epsilon aminotransferase
Glutamate decarboxylase alpha
Pyridoxamine kinase
Bifunctional polymyxin resistance protein arnA
Cysteine desulfurase
Gamma-aminobutyraldehyde dehydrogenase
1-pyrroline-5-carboxylate dehydrogenase
Epoxide hydrolase
Aromatic-amino-acid aminotransferase
2-isopropylmalate synthase
Glycosyltransferase GtfA
Extradiol ring-cleavage dioxygenase
Hydroxylamine reductase
Clavaminate synthase 1
Bifunctional adenosylcobalamin biosynthesis protein cobU
Carboxylesterase
Acyl-CoA dehydrogenase, short-chain specific
Peroxidase/catalase T
Isopentenyl-diphosphate Delta-isomerase
Protein ygbM
2-C-methyl-D-erythritol 4-phosphate cytidylyltransferase
Acetoin(diacetyl) reductase
Prenyltransferase
Pyrroline 5-carboxylate reductase isoform
Phenazine biosynthesis protein phzF
Ferredoxin reductase
Replication protein
Serine hydroxymethyltransferase 2
Serine hydroxymethyltransferase 1
Capsule biosynthesis protein
Benzyl alcohol dehydrogenase
Delta-aminolevulinic acid dehydratase
2,3-diketo-5-methylthiopentyl-1-phosphate enolase
Hydroxyquinol 1,2-dioxygenase
3-isopropylmalate dehydrogenase
Methylmalonyl-CoA carboxyltransferase 5S subunit
5'-fluoro-5'-deoxyadenosine synthase
Histone deacetylase-like amidohydrolase
GAF domain/HD domain protein
METHOXY MYCOLIC ACID SYNTHASE 4 MMAA4 (METHYL MYCOLIC ACID SYNTHASE 4) (MMA4) (HYDROXY MYCOLIC ACID SYNTHASE)
Bla-imp protein
Phosphatase yniC
Mycolic acid synthase
Phenazine biosynthesis protein PhzD
Hydrolase
1-deoxypentalenic acid 11-beta hydroxylase
D-alanine--D-alanine ligase B
R-specific alcohol dehydrogenase
4-chlorobenzoyl CoA ligase
Uridine phosphorylase, putative
DNA protection during starvation protein
Anthranilate phosphoribosyltransferase
Putative ABC transport protein, solute-binding component
Phosphotriesterase
Putative cytochrome P450
Alanine racemase, catabolic
Hypothetical protein VC1899
Esterase EstB
Tryptophanyl-tRNA synthetase 2
NimA-related protein
Agmatinase, putative
Putative alkylsulfatase
Phospho-2-dehydro-3-deoxyheptonate aldolase
Oxidoreductase, short chain dehydrogenase/reductase family
Aminotransferase, putative
6-phosphogluconolactonase
3-oxoacyl-(Acyl carrier protein) reductase
Oligopeptide ABC transporter, periplasmic oligopeptide-binding protein
3alpha-hydroxysteroid dehydrogenase/carbonyl reductase
TDP-glucose-4,6-dehydratase
L-cysteine/cystine lyase C-DES
Malonamidase E2
Glutamate dehydrogenase 1, mitochondrial
Coagulation factor XIII A chain
Aspartate aminotransferase, mitochondrial
Fructose-bisphosphate aldolase A
Uroporphyrinogen decarboxylase
Creatine kinase M-type
Adenine phosphoribosyltransferase
Ribonuclease pancreatic
Alcohol dehydrogenase 4
Phenylethanolamine N-methyltransferase
Pyruvate carboxylase, mitochondrial
Annexin A3
Pyruvate kinase isozymes M1/M2
D-amino-acid oxidase
Carboxypeptidase A1
Ganglioside GM2 activator
Gamma-aminobutyric-acid receptor subunit beta-1
NADH dehydrogenase [ubiquinone] iron-sulfur protein 8, mitochondrial
Oxidoreductase
Leucine carboxyl methyltransferase 2
NADH dehydrogenase [ubiquinone] iron-sulfur protein 3, mitochondrial
Calcium-binding mitochondrial carrier protein Aralar1
NG,NG-dimethylarginine dimethylaminohydrolase 2
NADH-ubiquinone oxidoreductase 75 kDa subunit, mitochondrial
Gamma-aminobutyric-acid receptor subunit beta-3
Aldehyde dehydrogenase X, mitochondrial
Succinate dehydrogenase [ubiquinone] flavoprotein subunit, mitochondrial
S-adenosylmethionine synthetase isoform type-2
Cystathionine gamma-lyase
Serine hydroxymethyltransferase, cytosolic
Myotonin-protein kinase
Bile acid CoA:amino acid N-acyltransferase
Glycine N-methyltransferase
Platelet-activating factor acetylhydrolase IB subunit gamma
Hydroxyacylglutathione hydrolase
Probable alanyl-tRNA synthetase, mitochondrial
Glycine N-acyltransferase
Dehydrogenase/reductase SDR family member 11
Glutathione S-transferase A5
L-xylulose reductase
N-acetylglutamate synthase, mitochondrial
Choline dehydrogenase, mitochondrial
Phosphoethanolamine/phosphocholine phosphatase
Glutamate [NMDA] receptor subunit 3A
Alanine aminotransferase 2
11-cis retinol dehydrogenase
Betaine--homocysteine S-methyltransferase 1
Glycine N-acyltransferase-like protein 1
Protein-glutamine gamma-glutamyltransferase Z
Egl nine homolog 1
Betaine--homocysteine S-methyltransferase 2
5'(3')-deoxyribonucleotidase, mitochondrial
NAD-dependent deacetylase sirtuin-5
Peroxisomal sarcosine oxidase
Mitochondrial dicarboxylate carrier
Trafficking protein particle complex subunit 4
NADP-dependent malic enzyme
Glutamate dehydrogenase 2, mitochondrial
Alanyl-tRNA synthetase, cytoplasmic
S-adenosylmethionine synthetase isoform type-1
Glutathione S-transferase Mu 4
Aminoacylase-1
Cysteine desulfurase, mitochondrial
Alanine--glyoxylate aminotransferase 2-like 2
Retinol dehydrogenase 13
Malonyl CoA-acyl carrier protein transacylase, mitochondrial
Proton-coupled amino acid transporter 1
Adenylosuccinate synthetase isozyme 1
L-lactate dehydrogenase A chain
Glycine receptor subunit alpha-2
Histone deacetylase 8
Pyrroline-5-carboxylate reductase 1
Short/branched chain specific acyl-CoA dehydrogenase, mitochondrial
2-amino-3-ketobutyrate coenzyme A ligase, mitochondrial
Pyruvate dehydrogenase E1 component subunit beta, mitochondrial
Peptidyl-prolyl cis-trans isomerase H
Peroxiredoxin-2
Glucose-6-phosphate isomerase
5-aminolevulinate synthase, erythroid-specific, mitochondrial
Glycine receptor subunit alpha-3
SHMT2 protein
Hypothetical protein DKFZp686P09201
Calcium-binding mitochondrial carrier protein Aralar2
NADP-dependent malic enzyme, mitochondrial
Ornithine decarboxylase antizyme 3
L-serine dehydratase
Choline/ethanolamine kinase [Includes: Choline kinase beta
Hydroxyacid oxidase 1
FK506-binding protein 1A
Guanidinoacetate N-methyltransferase
L-lactate dehydrogenase B chain
Proteasome subunit alpha type-1
Kynurenine--oxoglutarate transaminase 1
Urease
HCMV DNA polymerase
Glutamate carboxypeptidase II
Methylmalonyl-CoA mutase
GTP cyclohydrolase I
Phosphomannomutase/phosphoglucomutase
Enoyl-ACP reductase
Antiapoptotic protein BCL-XL
6-phosphogluconate dehydrogenase, decarboxylating
Pyruvate kinase isozymes R/L
3-methylaspartate ammonia-lyase
Exopolyphosphatase
Azurin
Lactaldehyde reductase
2-amino-3-ketobutyrate coenzyme A ligase
L-fuculose phosphate aldolase
Osmolarity sensor protein envZ
Penicillin acylase
Tyrosine phenol-lyase
GDP-L-fucose synthetase
Protoporphyrinogen oxidase
Deoxyribodipyrimidine photo-lyase
L-fucose isomerase
N-acylamino acid racemase
Ornithine aminotransferase variant
Serine hydroxymethyltransferase
Medium-chain-fatty-acid--CoA ligase
METHOXY MYCOLIC ACID SYNTHASE 2 MMAA2
Mercaptopyruvate sulfurtransferase
Methylmalonyl-CoA carboxyltransferase 12S subunit
Quinohemoprotein alcohol dehydrogenase ADH IIB
Aminolevulinate, delta-, synthase 2
N,N-dimethylglycine oxidase
Argininosuccinate lyase
Beta-glucuronidase
Carboxypeptidase B
Proline synthetase co-transcribed bacterial homolog protein
ATP synthase subunit alpha, mitochondrial
Ubiquinol-cytochrome-c reductase complex core protein 1, mitochondrial
Glycyl-tRNA synthetase
Pyrroline-5-carboxylate reductase 2
Chromosome 14 open reading frame 149
NADH dehydrogenase [ubiquinone] flavoprotein 1, mitochondrial
Delta 1-pyrroline-5-carboxylate synthetase
Propionyl-CoA carboxylase alpha chain, mitochondrial
4-trimethylaminobutyraldehyde dehydrogenase
Delta-1-pyrroline-5-carboxylate dehydrogenase, mitochondrial
Probable glutamyl-tRNA(Gln) amidotransferase subunit B, mitochondrial
Kynurenine/alpha-aminoadipate aminotransferase mitochondrial
5-aminolevulinate synthase, nonspecific, mitochondrial
Migration-inducing protein 4
Methylated-DNA--protein-cysteine methyltransferase
Sulfotransferase family cytosolic 2B member 1
Enoyl-[acyl-carrier-protein] reductase [NADH]
Alkaline phosphatase
Outer membrane protein A precursor
Glutathione S-transferase
Aminodeoxychorismate lyase
Pur operon repressor
Lantibiotic mersacidin
Major NAD(P)H-flavin oxidoreductase
Glucose-1-phosphate thymidylyltransferase 2
Probable thiol peroxidase
Allantoate amidohydrolase
Arginine N-succinyltransferase subunit alpha
Glutaconyl-CoA decarboxylase subunit alpha
Cytochrome c4
Glutathione S-transferase (BphK)
Selenocysteine lyase variant
CCA-adding enzyme
Acetyl transferase
Complement component C8 gamma chain
6-phosphofructo-2-kinase/fructose-2,6-biphosphatase 1
ADP-ribosylation factor 4
Cytochrome c oxidase subunit 5A, mitochondrial
Sepiapterin reductase
Retinol dehydrogenase 11
Estradiol 17-beta-dehydrogenase 8
Photoreceptor outer segment all-trans retinol dehydrogenase
Mitochondrial ornithine transporter 1
Putative cytochrome P450 130
Glutamate [NMDA] receptor subunit epsilon-3
Aminomethyltransferase, mitochondrial
5-oxoprolinase
Chondroitinase
Angiotensin-converting enzyme
Heparan sulfate glucosamine 3-O-sulfotransferase 3A1
Lysine-specific demethylase NO66
Renin
6-phosphofructokinase, muscle type
Non-lysosomal glucosylceramidase
Trehalase
Microtubule-associated protein 2
Protein kinase C gamma type
Protein kinase C zeta type
P-hydroxybenzoate hydroxylase
Y+L amino acid transporter 1
Purine nucleoside phosphorylase deoD-type
Putative adenosylhomocysteinase 2
Tyrosine-protein kinase BTK
Tumor necrosis factor ligand superfamily member 6
DNA damage-inducible transcript 3 protein
Delta-type opioid receptor
Retinoic acid receptor RXR-beta
cAMP and cAMP-inhibited cGMP 3',5'-cyclic phosphodiesterase 10A
Fos-related antigen 1
Fos-related antigen 2
Cytochrome c
Arachidonate 12-lipoxygenase, 12S-type
Nuclear factor of activated T-cells, cytoplasmic 1
Tudor domain-containing protein 7
NADPH oxidase 5
Fatty acid-binding protein, epidermal
Apolipoprotein D
Aspartate aminotransferase, cytoplasmic
Growth-inhibiting protein 18
Malate dehydrogenase
Fumarate reductase flavoprotein subunit
Ornithine carbamoyltransferase, mitochondrial
Prolyl 3-hydroxylase 1
Prolyl 3-hydroxylase 3
Succinyl-CoA:3-ketoacid-coenzyme A transferase 2, mitochondrial
Prolyl 4-hydroxylase subunit alpha-2
Succinyl-CoA ligase [ADP-forming] beta-chain, mitochondrial
Transitional endoplasmic reticulum ATPase
Sodium- and chloride-dependent GABA transporter 1
Seryl-tRNA synthetase, cytoplasmic
Formate dehydrogenase H
Threonyl-tRNA synthetase, cytoplasmic
Retinoic acid receptor RXR-gamma
Proliferating cell nuclear antigen
Serum albumin
Hepatocyte nuclear factor 4-alpha
Hepatocyte nuclear factor 1-alpha
Actin, cytoplasmic 1
Tripartite motif-containing protein 26
Glutamate [NMDA] receptor subunit epsilon 2
Sodium- and chloride-dependent glycine transporter 1
Arylsulfatase
Ferredoxin-dependent glutamate synthase 2
Asparagine synthetase [glutamine-hydrolyzing]
Carnitine O-palmitoyltransferase 2, mitochondrial
Tyrosyl-tRNA synthetase, mitochondrial
Glutamate receptor 1
Benzoylformate decarboxylase
Pyruvate-ferredoxin oxidoreductase
Vacuolar ATP synthase catalytic subunit A
Glutamate receptor, ionotropic kainate 2
Microsomal glutathione S-transferase 1
Cytochrome P450 3A43
High-affinity cationic amino acid transporter-1
Cationic amino acid transporter 4
Mitochondrial aspartate-glutamate carrier protein
Penicillin G acylase
Branched-chain-amino-acid aminotransferase, cytosolic
Catechol O-methyltransferase
Transcriptional activator Myb
Transforming protein RhoA
Glutamate decarboxylase 2
5-hydroxytryptamine 1A receptor
Hemoglobin subunit alpha
D(2) dopamine receptor
Beta-secretase
M-phase inducer phosphatase 3
Apoptotic protease-activating factor 1
Serine/threonine-protein kinase PLK1
14-3-3 protein sigma
Carnitine O-acetyltransferase
CAMP-specific 3',5'-cyclic phosphodiesterase 4A
Cytochrome P450 2B10
Vascular endothelial growth factor receptor 1
Protein kinase C epsilon type
Protein kinase C delta type
Granulocyte-macrophage colony-stimulating factor
Actin, aortic smooth muscle
Vascular endothelial growth factor receptor 3
Polyphenol oxidase I, chloroplastic
C-C motif chemokine 16
Cell division protein kinase 6
Eukaryotic translation elongation factor 1 epsilon-1
E3 ubiquitin-protein ligase Mdm2
Insulin-like growth factor 1 receptor
Induced myeloid leukemia cell differentiation protein Mcl-1
G1/S-specific cyclin-D2
Interleukin-4
NF-kappa-B essential modulator
Baculoviral IAP repeat-containing protein 4
CASP8 and FADD-like apoptosis regulator
Alpha- and gamma-adaptin-binding protein p34
Interleukin-13
High affinity immunoglobulin epsilon receptor subunit beta
Intestinal-type alkaline phosphatase
Proteasome activator complex subunit 3
Glucose-6-phosphatase
Adenomatous polyposis coli protein
Transient receptor potential cation channel subfamily M member 2
Sodium/iodide cotransporter
Sodium/potassium-transporting ATPase subunit gamma
Dolichyl-phosphate beta-glucosyltransferase
