# Supplementary material for: Uncovering the Pharmacological Mechanism of Chaibei Zhixian Decoction on Epilepsy by Network Pharmacology Analysis
Source: Evid Based Complement Alternat Med. 2019 May 12;2019:3104741. doi: 10.1155/2019/3104741 (PMC6535852; doi:10.1155/2019/3104741)
Supplement: Supplementary 3 — Supplemental Table 3: 26 protein targets of CZD associated with epilepsy through scanning TCMSP database. [file 3104741.f3.xlsx]

## Sheet: Sheet1
target_name
4-aminobutyrate aminotransferase, mitochondrial
5-hydroxytryptamine 2A receptor
5-hydroxytryptamine 2C receptor
Acetylcholinesterase
Amine oxidase [flavin-containing] B
BDNF/NT-3 growth factors receptor
Cholinesterase
Cytochrome P450 1A2
D(2) dopamine receptor
Estrogen receptor
Estrogen receptor beta
Gamma-aminobutyric-acid receptor alpha-5 subunit
Glutamate [NMDA] receptor subunit epsilon 2
Glutamate receptor 1
Glycogen synthase kinase-3 beta
Mitogen-activated protein kinase 1
Mitogen-activated protein kinase 3
Muscarinic acetylcholine receptor M1
Muscarinic acetylcholine receptor M4
Muscarinic acetylcholine receptor M5
Neuronal acetylcholine receptor protein, alpha-7 chain
Nitric-oxide synthase, brain
Nitric-oxide synthase, endothelial
Sodium- and chloride-dependent GABA transporter 1
Sodium channel protein type 5 subunit alpha
Sodium-dependent serotonin transporter
